1 Submit to bioRxiv as pre-print and PeerJ as publication March 2021. Word count: 7403

2 **Tick hazard in the South Downs National Park (UK):**  
3 **species, distribution, key locations for future**  
4 **interventions, site density, habitats**

5  
6 Jo Middleton<sup>1,2,3</sup>, Ian Cooper<sup>2</sup>, Anja S. Rott<sup>2</sup>

7  
8 <sup>1</sup> Department of Primary Care and Public Health, and NIHR Global Health Research Unit on  
9 Neglected Tropical Diseases, Brighton and Sussex Medical School, Falmer, UK

10 <sup>2</sup> School of Pharmacy and Biomolecular Sciences, University of Brighton, Brighton, UK

11 <sup>3</sup> Evolution, Behaviour and Environment, School of Life Sciences, University of Sussex, Falmer,  
12 UK

13  
14

15 Corresponding Author:

16 Jo Middleton

17 318a, Primary Care and Public Health, Brighton and Sussex Medical School, Watson Building,  
18 Falmer, BN1 9PH UK

19 Email address: [bsms6156@sussex.ac.uk](mailto:bsms6156@sussex.ac.uk)

20 Twitter: @MedVetAcarology

21 ORCID iD: 0000-0001-5951-6608

22 **Abstract** [500/500]

23 **Background.** The South Downs National Park (SDNP) is the UK's most visited National Park,  
24 and a foci of tick-borne Lyme disease. A range of human pathogens have been detected in UK  
25 ticks and related hosts, and the first presumed autochthonous cases of tick-borne encephalitis and  
26 babesiosis were recorded in 2019–20. SDNP's key objectives include conserving wildlife and  
27 encouraging enjoyment of the countryside, so interventions are needed that reduce hazard without  
28 negatively affecting ecosystem health. To be successful these require knowledge of site hazards,  
29 and we aimed to provide this to enable action.

30 **Methods.** British Deer Society volunteers submitted ticks removed from deer. Key potential  
31 intervention sites were selected and ticks collected by drag-sampling six 50 m<sup>2</sup> transects per site,  
32 in most cases twice yearly for two years. Ticks were identified in-lab (sex, life stage, species),  
33 hazard measured as tick presence, Density of Ticks (all life stages, DOT), and Density of  
34 Nymphs (DON). Sites and habitat types were analysed for association with hazard. Distribution  
35 across SDNP was mapped in a Geographic Information System (GIS), by combining and  
36 comparing our fieldwork results with records from five other data sources (recent and historic).

37 **Results.** 87 *Ixodes ricinus* (all but one adults, 82%F) were removed from 14 deer (*Dama dama*  
38 n=10; *Capreolus capreolus* n=3; 1 not recorded; tick burden, 1–35) at 12 locations (commonly  
39 woodland). Five potential key intervention sites were identified and drag-sampled 2015–16,  
40 collecting 623 ticks (238 on-transects): 53.8% nymphs, 42.5% larvae, 3.7% adults (13M, 10F).  
41 Ticks were present on-transects at all sites drag-sampled (*I. ricinus* at three, *Haemaphysalis*  
42 *punctata* at two). The Mens (TM, the quietist site for human visitors) had the highest DOT at  
43 30/300 m<sup>2</sup> (DON=30/300 m<sup>2</sup>), followed by Queen Elizabeth Country Park (QECP, the busiest) at  
44 22/300 m<sup>2</sup> (12/300 m<sup>2</sup>), Cowdray Estate (CE) at 8/300 m<sup>2</sup> (6/300 m<sup>2</sup>), and Seven Sisters Country

45 Park (SSCP) at 1/300 m<sup>2</sup> (1/300 m<sup>2</sup>). Ditchling Beacon Nature Reserve (DBNR) was sampled  
46 2016 only (one adult *H.punctata* collected). Woodland had significantly higher hazard than  
47 grazed downland, but ticks were present at all downland sites drag-sampled. GIS mapping  
48 showed *I.ricinus* identified in 33/37 of SDNPs 10 km<sup>2</sup> grid squares, *Ixodes hexagonus* 10/37,  
49 *H.punctata* 7/37, *Dermacentor reticulatus* 1/37.

50 **Conclusions.** Mapping shows tick hazard is broadly distributed across SDNP. *Ixodes ricinus* was  
51 most common, though the seeming range expansion of *H.punctata* is concerning, particularly as  
52 it seems to thrive better on grazed downland than *I.ricinus*. Site specific recommendations  
53 include: management of small high hazard plots with heavy visitor numbers (QECP); signage on  
54 post-visit precautions (all sites); repellent impregnated clothing for deerstalkers (CE); flock trials  
55 to control *H.punctata* (SSCP, DBNR). Further research at TM, which has high tick density, may  
56 contribute to knowledge on ecological dynamics underlying infection density, and the potential  
57 use of predator re-introduction/protection as a public health intervention. Ecological research on  
58 *H.punctata* would aid control. The SDNP Authority is ideally placed to link and champion site-  
59 based and regional policies to reduce hazard, whilst avoiding or reducing conflict between public  
60 health and ecosystem health.

## 61 INTRODUCTION

62 The South Downs National Park (SDNP) covers 1,627 km<sup>2</sup> of the south-east of the British Isles,  
63 across Hampshire, West Sussex, and East Sussex. It encompasses two bioregions, the 140 km  
64 long chalk ridge of the South Downs, and the wooded lowland Weald. Though much of the Park  
65 is subject to industrial agriculture, substantive fragments of rare and species rich semi-natural  
66 chalk grassland can be found on its windy hills, whilst some of its woodlands are truly ancient  
67 (>1000 y) and harbor biodiverse ecological communities (Crane & Williams, 2013). It is the most  
68 visited national park in the UK, with an estimated 39 million visitor days per year (NPUK, 2014),  
69 c.120,000 people live and/or work within its borders, two million live within 5 km (SDNPA,  
70 2020). A substantial part of the national park is private land with limited or no public access  
71 (Bangs, 2008). However, the area is crisscrossed by 3218 km of public rights-of-way (TTC,  
72 2018), and there is sizable local authority owned country parks and myriad nature reserves. Some  
73 stretches of downland are legally classed as ‘Access Land’ (SDS, 2021) and some landowners  
74 also allow permissive paths. The South Downs Way is one of 15 UK national trails and is very  
75 popular with walkers, cyclists, and horse-riders. Over one year 61,191 people were counted  
76 passing one point of the trail (ESCC, 2016), locations closer to carparks can be far busier still  
77 (HCC, 2020).

78 Ticks (Ixodida) are second only to mosquitoes globally as vectors of human pathogens (Lawrie *et*  
79 *al.*, 2004). Twenty species of tick are native to Great Britain (Jameson & Medlock, 2011), 26 to  
80 northwestern Europe as a whole (Hillyard, 1996). Most are relatively host specific and primarily  
81 nidicolous (i.e. living in or near shelters used by their hosts), and therefore of minimal risk to  
82 humans (Gray, Estrada-Pena & Vial, 2014). (Throughout this article we use ‘tick hazard’ to refer  
83 to tick species that parasitise humans, and ‘tick risk’ as tick hazard x chance of human exposure).

84 In contrast to nidicolous species, some ticks feed on diverse host communities, climbing  
85 undergrowth or litter and attaching to passing potential vertebrate hosts, including humans. In  
86 three regions in England and Wales, patients consulted General Practitioners about tick-bites at a  
87 rate of 54–204 per 100 000 inhabitants in 2011, 72.5% of respondents in Cumbria had removed  
88 ticks from patients 2011–13 (101/100 000 population) (Gillingham *et al.*, 2020). This is only a  
89 partial glimpse of the full extent of bites; an estimated  $\frac{1}{3}$ – $\frac{2}{3}$  of those fed upon remain unaware  
90 (Hofhuis *et al.*, 2015), particularly if bitten by smaller instars, and even if noticed many don't  
91 seek medical advice. For example, a 2007 population survey in the Netherlands found a tick bite  
92 incidence of 7198/100 000, c.1.1 million bites were reported. This equates to approximately  
93 fifteen times the number of tick-bite related general practice consultations (Hofhuis *et al.*, 2015).  
94 Lyme disease is the primary human tick-borne disease of concern in the UK. Cairns *et al.* (2019)  
95 used general practice data to estimate a 1-year Lyme disease incidence of 12/100 000 (cautious  
96 interpretation is warranted, 59% of these clinical diagnoses lacked documented laboratory  
97 confirmation). The causative pathogen of Lyme disease, *Borrelia burgdorferi* s.l., was only  
98 identified in 1983 (Sood, O'Connell & Weber, 2011), and over the last decade other human  
99 pathogens have been detected in ticks and related hosts in the British Isles, including: spotted  
100 fever group rickettsia (Tijssse-Klasen *et al.*, 2011; 2013), *Borrelia miyamotoi* (Hansford *et al.*,  
101 2015), tick-borne encephalitis virus (Holding, Dowall, Hewson, 2020), and *Babesia venatorum*  
102 (Gray *et al.*, 2019; Weir *et al.*, 2020). In 2019–20 the first presumed autochthonous human cases  
103 of tick-borne encephalitis and babesiosis were recorded in the UK (PHE, 2020a). Some of these  
104 recently detected health threats may result from emerging foci of imported pathogens. However,  
105 it is also possible that in addition to Lyme disease, there may be considerable levels of  
106 undiagnosed tick-borne infections affecting persons in the British Isles.

107 Public Health England have mapped UK tick distributions at 10 km<sup>2</sup> resolution by combining  
108 historical records (Pietzsch *et al.*, 2005) with samples sent by the public, who in most cases found  
109 them attached to themselves or their pets (Jameson & Medlock, 2011). It should be noted that UK  
110 general practice records of arthropod bites do not identify by species (Newitt *et al.*, 2016).  
111 Hospital Episode Statistics (HES) have been used to map Lyme disease distribution across  
112 England (Cooper *et al.*, 2017). However, HES uses residential postcodes of patients, not where  
113 they were bitten. Thus, whilst HES is valuable to understanding disease burden given that UK  
114 tick-borne infections are very often linked to recreational exposure (Dobson, Taylor & Randolph,  
115 2011), the use of this to map differing geographic tick hazard is limited. This is especially true in  
116 places such as the SDNP, with high numbers of regional, national, and international visitors.  
117 Knowledge on tick density, the most reliable metric of site tick hazard (Ostfeld, 2011), is  
118 therefore restricted to the relatively small number of places in Britain actively field-sampled.

119 The SDNP is a priority area for interventions that reduce tick-borne disease hazard whilst  
120 preserving ecosystem health. Prior to our study its downland section had been highlighted by the  
121 Health Protection Agency (part-precursor to Public Health England) as a ‘regional foci of Lyme  
122 borreliosis’ (HPA, 2012), whilst West Sussex was listed alongside the South Downs as one of 10  
123 areas in England and Wales where Lyme disease infection was most frequent (HPA, 2010). Yet  
124 despite this and the Park’s very large visitor numbers, prior to our study no multi-site field  
125 sampling of tick hazard in the SDNP, or comparison of hazard between its key habitats, had been  
126 published. Elsewhere woodland has been linked to increased tick-borne disease hazard,  
127 specifically Lyme disease (Gray *et al.*, 1998; Killilea *et al.*, 2008), though controversy remains  
128 over causal pathways (Levy, 2013). For example, research linking forest fragmentation to  
129 increased Lyme disease hazard (summarised best in Ostfeld (2011)) has been criticized by UK

130 researchers (Randolph & Dobson, 2012). Sheep grazing supports vector populations in some UK  
131 grass uplands, and though not host competent for *Borrelia burgdorferi* s.l., sheep can support  
132 transmission cycles via tick co-feeding (Ogden, Nuttall & Randolph, 1997), and also host  
133 *Babesia venatorum* (Gray *et al.*, 2019). However, compared to wildlife, the role of livestock in  
134 propagation of tick-borne diseases of human concern is under-researched (Stanek *et al.*, 2012).  
135 Increased wildlife populations have been implicated elsewhere in rising incidence of tick-borne  
136 disease (e.g. Crimean-Congo hemorrhagic fever in Turkey (Randolph, 2009a); tick-borne  
137 encephalitis in East Europe (Randolph, 2009b)) setting up a potential conflict between  
138 biodiversity and human health. Given UK National Parks aim to enhance wildlife and encourage  
139 public enjoyment of the countryside (NPUK, 2017), such conflict would be problematic for the  
140 South Downs National Park Authority (SDNPA) and the local governments from which most of  
141 its members are drawn. However, its joint remit, bioregional framing, and coalition of  
142 stakeholder members makes it the ideal body to link and champion site-based and regional  
143 policies to reduce hazard, whilst avoiding or reducing conflict between public health and  
144 ecosystem health.

#### 145 **Aims**

146 Our overall project (*Tick-borne hazards in the SDNP and the potential for Planetary Health*  
147 *based interventions*) includes (1) mapping and fieldwork to better understand tick hazard across  
148 the SDNP, including crucially at key potential locations for future interventions, (2) a systematic  
149 review of proposed interventions to reduce site hazard of the most common tick-borne disease in  
150 Britain, Lyme disease, with a focus on those actions not expected to negatively affect ecosystem  
151 health. Here we report on our mapping and fieldwork, information on our systematic review can  
152 be found in Middleton, Cooper & Rott (2016).

153 Study objectives:

- 154 • identify and describe potential key locations for future interventions;
- 155 • map distribution of tick hazard across the SDNP;
- 156 • determine tick hazard (species and density) at potential intervention sites; and
- 157 • analyse habitat associations with tick hazard in the SDNP.

## 158 **MATERIALS AND METHODS**

### 159 **Sites selection for drag-sampling and potential future interventions**

160 Five sites were selected: three prospectively, and two responsively after submission of ticks  
161 obtained by deerstalkers from sentinel deer. The three prospectively chosen sites were located  
162 one in each of the SDNP's three counties. We took this approach so as to sample from along the  
163 National Park's length, and because one of our project's primary audiences is county authorities  
164 which manage countryside sites within the SDNP with high numbers of recreational visitors (e.g.  
165 UK accredited country parks as defined by NE & DEFRA (2014)). These authorities are key to  
166 implementing potential interventions to reduce tick-borne disease risks in the SDNP as they elect  
167 governing members to SDNPA (responsible for strategic action across SDNP), and directly  
168 manage downland and woodland sites with high visitor numbers where interventions could be  
169 trialed. Of the three counties within SDNP's borders, two county councils manage such sites in  
170 the National Park: Hampshire County Council (SDNP's western section), and East Sussex  
171 County Council (SDNP's eastern section). West Sussex County Council (SDNP's central section)  
172 does not perform this function within the National Park. The SDNP's ranger service was  
173 consulted about which Hampshire County Council and East Sussex County Council sites had the  
174 highest visitor numbers (subsequently confirmed by councils themselves). Given West Sussex  
175 County Council do not manage an appropriate site for sampling, a third site was chosen at



176 SDNP's center which represented a sizeable wealden woodland owned by a key Park stakeholder  
177 (Sussex Wildlife Trust).

### 178 **Tick collection from Deer**

179 Deerstalkers were recruited through the British Deer Society (bds.org.uk) newsletter and website,  
180 sent kits, and asked to collect ticks from deer culled for reasons unrelated to this project.

181 Participants were instructed to inspect the whole animal, collect every visible tick, place them in  
182 pre-coded 1ml cryovials (pre-filled with 0.5ml 70% ethanol) and return by post (safety measures,

183 Supplementary Material p. 2). On receipt cryovials were deposited in a laboratory fridge (approx.

184 5 °C), and after identification transferred to a freezer (approx. -20 °C). Deerstalkers recorded:

185 habitat type; deer species; six-figure grid reference (using 'OS Locate' (Ordnance Survey,

186 London, 2014)); body sites ticks found at; and whether ticks were attached or not.

### 187 **Tick collection by drag-sampling**

188 Sites were sampled April to November inclusive. To collect questing ticks, sampling was not

189 carried out when air temperature was <7 °C 50 cm above the ground or when vegetation was wet

190 from recent rain/dew, as per James *et al.* (2013). Four sites were sampled in both 2015 and 2016,

191 with an additional site sampled in 2016. At each, six 1m x 50m transects were sampled as per

192 Dobson, Taylor & Randolph (2011). The first two transects chosen were those suspected to have

193 the highest potential exposure of humans to ticks (e.g. vegetation alongside a footpath). Where

194 sites included grassland and woodland, one chosen transect was selected from each. All others

195 were selected using dice and a random number table. To reduce spurious conclusions from single

196 sampling, each transect was planned to be sampled twice yearly, for two years. However, at one

197 private site used for game shooting, it was not possible to visit twice in year-2 due to a

198 requirement to be accompanied by a deerstalker with restricted availability. To improve chances

199 of picking up disease signals in planned follow-up research (usually only a minority of ticks at  
200 any site are infected (Vollmer *et al.*, 2011)), extras were acquired by drag-sampling between  
201 transects, and at follow up visits where possible. Tick sampling techniques differ in efficacy and  
202 are affected by habitat/vegetation type (Dantas-Torres *et al.*, 2013). To reduce bias ticks were  
203 collected simultaneously along transects using woollen blanket, flags, and chaps (*Fig. 1*). Wools  
204 were examined after each transect, ticks placed individually in 70% ethanol filled micro-  
205 centrifuge tubes, deposited same day in a laboratory freezer (approx. -20°C).

206 At each transect, at each sampling, photos were taken along with field notes including: ticks  
207 collected; date/time; weather; habitat; visitors observed; dominant vegetation; vegetation height;  
208 main litter constituents; relative humidity and temperature (both at 50cm and in litter, measured  
209 with a Fisher Scientific Traceable Hygrometer). Locations were recorded (10-figure OS grid  
210 references, bearings) using 'OS Locate' and 'OS Mapfinder' (Ordnance Survey, London, 2014)  
211 on a Samsung Galaxy Note II phone. (Researcher safety and inter-site contamination control,  
212 Supplementary Material p. 2.)

### 213 **Tick identification**

214 Identification was conducted in-lab with a hand lens (Hilkinson Ruper x20 15mm achromatic),  
215 and where necessary a dissecting microscope (Leica EZ4). A species key was used (Hillyard,  
216 1996), and identification aided by reference to Baker (1999) and Beati, Needham & Klompen  
217 (2016). Species and life stage was recorded, adult ticks sexed. Larvae were not fully keyed as  
218 clearing for slide mounting would have reduced the sample pool available for future pathogen  
219 detection. However, each larva was inspected for characters which identified them to genus, and  
220 indicated likely species. If nymphs/adults of more than one species were identified at any site,  
221 10% of larvae from that site (to a maximum of 50) would have been slide mounted and keyed. A

222 limitation of many similar studies has been not enabling retrospective evaluation of species  
223 identification (Estrada-Pena *et al.*, 2013). To corroborate identification, voucher specimens  
224 (including all life stages/sexes) are stored at approx. -20 °C at the University of Brighton, to be  
225 deposited into the Natural History Museum acarology collection on publication.

## 226 **Mapping distribution of tick hazard**

227 Using ArcMap 10.7 (ESRI, Redlands USA) sites where ticks had been submitted by deerstalkers  
228 or drag-sampled by JM were mapped, indicated by points at 100 m<sup>2</sup> resolution. In addition, to  
229 map recorded presence of tick hazard at 10 km<sup>2</sup> resolution by species, data from the following  
230 sources were compared and combined as layers: (1) the most recent published Public Health  
231 England/Health Protection Agency tick maps for England and Wales (Cull *et al.*, 2018; PHE,  
232 2016; HPA, 2013a, b, c, d), (2) National Biodiversity Network Atlas (NBN, 2020) (which  
233 includes historic data 1890 onwards, and into which Public Health England now submits tick  
234 records (PHE, 2020b)), (3) a single site drag-sample in 2014 by Layzell *et al.* (2018), (4) point  
235 locations of ticks submitted from culled deer or collected by drag-sampling in this project 2015-  
236 16, (5) point locations drag-sampled for *Haemaphysalis punctata* by Public Health England and  
237 the Animal and Plant Health Agency, primarily 2015-18 (Medlock *et al.*, 2018), (6) records from  
238 pan-species surveying at Sussex Wildlife Trust reserves, mainly 2016-17 (previously unpublished  
239 data). Digital basemaps were obtained from OS OpenData (2020) and Natural England (2020).  
240 (Layer generation detailed in Supplementary Material, p. 3.)

## 241 **Analysis**

242 As well as site vector presence/absence, for sites drag-sampled both years tick hazard was  
243 assessed as (1) questing Density of Ticks, all life stages (DOT), and (2) questing Density of  
244 Nymphs (DON). These were calculated as means of totals of four site samplings: six 1m x 50m

245 transects, sampled twice yearly for two years. To determine significance of difference of tick (all  
246 life stages) and nymph counts between the four sites sampled in both years, Kruskal-Wallis Tests  
247 with follow-on Dunn's Tests were carried out on counts from all individual transect samplings  
248 (i.e. 90 50m x 1m drag-samplings). A further Kruskal-Wallis Test with follow-on Dunn's Test  
249 examined habitat types determining tick hazard. Statistical analysis was carried out in Mintab17  
250 (Minitab Inc, State College, Pennsylvania). Drag-sampling results from the additional site  
251 sampled in 2016 are reported as presence/absence, and in distribution mapping, but were not  
252 included otherwise in analysis. (Justification of analysis, Supplementary Material p.3.)

### 253 **Data availability**

254 All relevant data are included in this article or Supplementary Material (machine readable data  
255 deposited at <https://sussex.figshare.com/bsms>). On publication all novel tick records will be  
256 uploaded to NBN Atlas.

257

## 258 **RESULTS**

259 *Figure 2* maps the locations where ticks were submitted from by deerstalkers, and the five  
260 potential future intervention sites drag-sampled across the SDNP by the first author. The tick  
261 species collected at each site and the locations of nearby towns are also given.

### 262 **Sites selected for drag-sampling and potential future interventions**

#### 263 *Prospectively selected*

264 East Sussex County Council's site with the highest annual visits (est. 350,000 (ESCC & SDCB,  
265 2004)), was the 280 ha Seven Sisters Country Park ([sevensisters.org.uk](http://sevensisters.org.uk)) in the SDNP's eastern  
266 section. Its visitors centre had 52,124 visitors Jan–Dec 2019 (ESCC, 2020), and only a minority

267 of trips to Seven Sisters Country Park are expected to include a visit to the centre. Unlike the  
268 other sites it attracts a large number of international tourists, its white cliffs having featured in  
269 major films and as a default Microsoft Windows wallpaper (BBC, 2017; Tsang, 2018; Baddeley,  
270 2020). Seven Sisters Country Park is easily reachable by day-visitors from Eastbourne (8 km  
271 away; est. 2019 pop. 114,809 (ONS, 2020)) and Brighton and Hove (24 km away; est. 2019 pop.  
272 244,917 (ONS, 2020)). It is composed of chalk grassland, saltmarsh, shingle seashore, woodland,  
273 and a meandering river. Conservation designations include Site of Special Scientific Interest  
274 (SSSI), Area of Outstanding Natural Beauty (AONB), Heritage Coast, and Marine Conservation  
275 Area. Transects (*Fig. 3A–F*) consisted of sheep grazed chalk downland and woodland, primarily  
276 beech (*Fagus sylvatica*) and sycamore (*Acer pseudoplatanus*) (Supplementary Material *Table*  
277 *S1*). Hampshire County Council’s site with the highest annual visits (est. 327,000 (Speller *et al.*,  
278 2010)) was the 564 ha Queen Elizabeth Country Park  
279 ([hants.gov.uk/thingstodo/countryparks/qecp](https://hants.gov.uk/thingstodo/countryparks/qecp)) in the SDNP’s western section. In March 2019–  
280 April 20 Queen Elizabeth Country Park’s number plate recognition system recorded 202,559  
281 vehicle entries (HCC, 2020). It is 19 km from Portsmouth (est. 2019 pop. 229,851 (ONS, 2020)),  
282 popular with walkers, mountain bikers and picnickers, and hosts outdoor events such as  
283 marathons. It consists of downland and wooded hills, designations include: SSSI, National  
284 Nature Reserve, Special Area for Conservation, Scheduled Ancient Monuments. All transects  
285 (*Fig. 3G–L*) were in woodland (beech, conifer, or hazel (*Corylus avellana*)). Some had sparse  
286 undergrowth with dense beech or conifer litter, others nettle patches (*Urtica dioica*) or bramble  
287 thickets (*Rubus fruticosus* agg.) (Supplementary Material, *Table S2*).

288 The third site selected prospectively was woodland at The Mens in West Sussex, a 166 ha nature  
289 reserve owned by Sussex Wildlife Trust in the central section of the SDNP

290 ([sussexwildlifetrust.org.uk/visit/the-mens](http://sussexwildlifetrust.org.uk/visit/the-mens)). There are less major conurbations close to this section  
291 of the SDNP compared to its eastern and western parts. The nearest mid-sized town is Horsham  
292 (18 km away; 2011 pop. 49,000 (Horsham District Council, 2016)). The Mens has a small  
293 carpark and a network of paths, but is otherwise largely unmanaged wealden forest with  
294 relatively few visitors. The site is especially rich in plants, saproxylic invertebrates, and fungi  
295 (c.600 species). The sampled transects (*Fig. 4A–F*) followed footpath borders tufted with grass,  
296 and cut across ground with sparse undergrowth under high canopies of predominantly beech, and  
297 sections with dense waist-high brambles (Supplementary Material, *Table S3*).

#### 298 *Responsively selected*

299 The 6677 ha Cowdray Estate ([cowdray.co.uk](http://cowdray.co.uk)) is owned by Viscount Cowdray in the SDNP's  
300 central section in West Sussex, 9 km from Chichester (2011 pop. 26,795 (ONS, 2015)). It is a  
301 large private landholding with commercial deerstalking and mostly consists of forestry,  
302 downland, arable, and dairy/livestock farming. Cowdray Estate has visitor attractions (golf  
303 course, holiday cottages, conference/wedding venue, farm shop and café), and is crossed by well-  
304 used public paths. Transects (*Fig. 4G–L*) sampled conifer plantation and sheep-grazed downland  
305 (Supplementary Material, *Table S4*). The final site (sampled 2016 only) was the 24 ha Ditching  
306 Beacon Nature Reserve in East Sussex ([sussexwildlifetrust.org.uk/visit/ditchling-beacon](http://sussexwildlifetrust.org.uk/visit/ditchling-beacon)),  
307 managed by Sussex Wildlife Trust in the SDNP's eastern section. Ditching Beacon Nature  
308 Reserve is 4 km from Brighton and consists of downland plateau and steep scarp slopes of chalk  
309 grassland and woods. The plateau is next to a busy National Trust carpark and is popular with  
310 walkers, mountain bikers, and picnickers. Parts of Ditching Beacon Nature Reserve are under  
311 conservation grazing with sheep/cattle. The escarpment is an SSSI harboring flower rich chalk  
312 grassland, rare orchids, and butterflies. Transects ran through grazed downland, some bordering

313 hawthorn (*Crataegus monogyna*) and ash (*Fraxinus excelsior*) scrub, and along verges of  
314 footpaths leading from car parks (Supplementary Material, *Table S5*).

### 315 **Extent of tick hazard across the SDNP**

#### 316 *Distribution and species*

317 Ticks collected by drag-sampling or submitted by deerstalkers confirmed presence across much  
318 of SDNP (*Fig. 2*). Ticks were present in both of its characteristic habitats: sheep grazed  
319 downland, and the wealden woods. Ticks were found at all sites drag-sampled (though not on all  
320 transects, *Figs. 3* and *4*; Supplementary Material, *Tables S1–4*). All ticks submitted from deer  
321 were *Ixodes ricinus* (*Fig. 5A*), also the only species collected at three of the four sites drag-  
322 sampled in both 2015 and 2016 (Queen Elizabeth Country Park, The Mens, Cowdray Estate).  
323 The nationally rare *H.punctata* (*Fig. 5B*) was the sole tick collected from the remaining site  
324 sampled in both years (Seven Sisters Country Park), and was also found at Ditchling Beacon  
325 Nature Reserve in 2016.

326 *Figure 6* maps distribution of tick records at 10 km<sup>2</sup> resolution. The first report for *I.ricinus* is  
327 from 1964, 33/37 of the Parks grid squares have had at least one record (often multiple) in the  
328 last 15 years (*Fig. 6A*). In contrast, *Ixodes hexagonus* has been recorded far less, most squares  
329 where presence has been recorded represent historic records only (*Fig. 6B*). The earliest  
330 *H.punctata* report is from 1920, but all related grid squares have had recorded presence in the last  
331 decade, mostly in its known foci in the far east of the Park (*Fig. 6C*). Locations included from  
332 recent drag-sampling by Public Health England and Animal and Plant Health Agency suggests it  
333 has spread westwards somewhat, and this observation by Medlock *et al.* (2018) is confirmed by  
334 drag-sampling in our study at Ditchling Beacon Nature Reserve which extends its known range  
335 further still, as does a previously unpublished isolated recording by Sussex Wildlife Trust 44 km

336 further west. A second rare species in the UK, *Dermacentor reticulatus*, was recorded by Sussex  
337 Wildlife Trust at one of its West Sussex reserves in 2004 (Fig. 6D). To our knowledge  
338 *D. reticulatus* has not otherwise been recorded in the SDNP or its constituent counties; this record  
339 was not previously included in National Biodiversity Network Atlas or Public Health  
340 England/Health Protection Agency published mapping. There are a few records of *Ixodes*  
341 *frontalis* and *Ixodes trianguliceps*. These have not been mapped as they are highly host type  
342 specific and not routinely hazardous for humans (Mysterud *et al.*, 2015; Drehmann *et al.*, 2019).

#### 343 *Ticks collected from Deer*

344 Eighty-seven ticks were submitted (Table 1) obtained from 14 deer at 12 locations (Fig. 2). All  
345 but one were adult ticks, and 82% were females. The majority of males were attached in mating;  
346 the majority of females were engorged (73%, n=71, two not recorded by collectors), as was the  
347 sole nymph. The commonest habitat ticks were collected off deer at was 'wood' (59%, n=87).  
348 Most of the remaining were from deer shot at mixed edge-habitats involving wood (28%, n=87),  
349 e.g. 'wood-heath'. The majority of hosts were fallow deer (*Dama dama*) (10, 71%), followed by  
350 roe (*Capreolus capreolus*) (3, 21%) (n=14, one host species not recorded by collector). Tick  
351 burden was 1–35 per deer. The most common attachment sites were abdomen and sternum, and  
352 posterior and frontal axillae (Fig. 7).

#### 353 *Ticks collected by drag-sampling*

354 Drag-sampling four sites in both 2015 and 2016 collected 622 ticks (Table 2). Of these, 237 were  
355 along transects and are included in calculations of vector densities and analysed statistically. 385  
356 extras were stockpiled to aid future pathogen detection. Ticks were present at all four sites and  
357 the additional site sampled twice in 2016 (1 adult only). Of ticks collected by drag-sampling at all  
358 sites (n=623), most were nymphs (53.8%), followed by larvae (42.5%), and a small number of



359 adults (3.7%, 13 males, 10 females (Supplementary Material, *Tables S1–4*). 93.3% (222) of ticks  
360 gathered along transects (n=238) had attached to woollen blankets, 6.7% (16) to woollen chaps,  
361 and none were attached to flags (*Table 2*). *Figure 8* shows a breakdown of tick data from  
362 transects by collection month, and by tick life stage (all sites for y1 and y2, n=238).

### 363 **Tick hazard at potential sites for interventions**

#### 364 *Site-by-site*

365 Seven Sisters Country Park: *Figures 3A–F* show the number of ticks obtained at each transect, at  
366 each sampling (Supplementary Material, *Table S1*). 78 *H.punctata* ticks were collected, four  
367 along transects, 74 off-transect, representing all life stages, attached to both blanket (76) and  
368 chaps (2) (*Table 2*). On-transect ticks were nymphs (2) and adults (2). All ticks were collected on  
369 downland, none having been collected on the wooded transects (Supplementary Material, *Table*  
370 *S1*). Tick hazard ranged 0–2 ticks per 50 m<sup>2</sup> individual sampling, site DON and DOT were both 1  
371 per 300 m<sup>2</sup> (*Table 3*). There were hundreds of visitors observed every day. The area which  
372 provided most off-transect ticks is in the background of the photo of transect 3 (*Fig. 3C*), hosting  
373 a school picnic.

374 Queen Elizabeth Country Park: *Figures 3G–L* show the number of ticks obtained at each  
375 transect, at each sampling (Supplementary Material, *Table S2*). 183 *I.ricinus* ticks were collected,  
376 89 on-transect, 94 off-transect, from all life stages, attached to both blanket (175) and chaps (8)  
377 (*Table 2*). On-transect ticks were larvae (37), nymphs (47), and adults (5). Ticks were found on  
378 five of the six transects, all of which were wooded or on paths verging woodland (Supplementary  
379 Material, *Table S2*), range 0–25 per 50 m<sup>2</sup> sampling, DON=12 per 300 m<sup>2</sup>, DOT=22 per 300 m<sup>2</sup>  
380 (*Table 3*). A very large number of visitors were present during all site visits, and though some

381 transects were especially busy (e.g. *Fig. 2G*, running from the visitor centre) people were  
382 observed during sampling at all transects, even far from carparks.

383 The Mens: *Figures 4A–F* show the number of ticks obtained at each transect, at each sampling  
384 (Supplementary Material, *Table S3*). 330 *I. ricinus* ticks were collected, 121 on-transect, 209 off-  
385 transect, representing all life stages, attached to both blanket (296) and chaps (4) (*Table 2*). On-  
386 transect ticks were larvae (35), nymphs (82) and adults (4). Ticks were obtained from all six  
387 transects (Supplementary Material, *Table S3*), range 0–21 per 50 m<sup>2</sup> sampling, DON=21 per 300  
388 m<sup>2</sup>, DOT=30 per 300 m<sup>2</sup> (*Table 3*). Few visitors were met during sampling visits and, unlike any  
389 of the other sites, sometimes none were encountered.

390 Cowdray Estate: *Figures 4G–L* show the number of ticks obtained at each transect, at each  
391 sampling (Supplementary Material, *Table S4*). 31 *I. ricinus* ticks were collected, 23 along  
392 transects, eight off-transect, from all life stages, attached to both blanket (29) and chaps (1)  
393 (*Table 2*). On-transect ticks were nymphs (22) and adult (1). Ticks were collected on five of six  
394 transects, on both woodland and downland (Supplementary Material, *Table S4*), range 0–7 per 50  
395 m<sup>2</sup> sampling, DON=6 per 300 m<sup>2</sup>, DOT=8 per 300 m<sup>2</sup> (*Table 3*). Public footpaths along transects  
396 (*Fig. 4H* and *L*) were in use by walkers during all visits. One of two downland transects on which  
397 a tick was found ran along the South Downs Way.

398 Ditchling Beacon Nature Reserve: One single *H. punctata* tick was collected on-transect on semi-  
399 grazed downland adjacent to scrub woodland, none on the other five transects at either set of  
400 samplings in 2016. The adult male tick had attached to the blanket (*Table 2*). Densities were not  
401 calculated due to 1-year only sampling (Supplementary Material, p. 3). Every day during

402 sampling large numbers of visitors were observed crossing the high plateau, few on the lower  
403 scarp slope where the tick was collected.

#### 404 *Comparisons between sites*

405 Tick hazard was detected at all four sites surveyed in both 2015 and 2016, but levels (range per  
406 sampling, DON, DOT) differed between them, as outlined above and shown in *Table 3*. Kruskal-  
407 Wallis Tests showed average ranks for (i) nymphs, and (ii) ticks (all life stages) differed  
408 significantly ( $<0.05$ ) for at least one of the four sites (nymphs:  $H=31.59$  (DF 3,  $n=90$ ),  $p=0.000$   
409 (adjusted for ties); ticks (all life stages):  $H=31.93$  (DF 3,  $n=90$ ),  $p=0.000$  (adjusted for ties)).  
410 Post-hoc Dunn's Tests were used to carry out pairwise site comparisons (magnitudes and  
411 directions of differences, Supplementary Material *Fig. S1*). The Mens had significantly more  
412 nymphs than Cowdray Estate ( $Z=2.128$ ,  $p=0.0000$ ), Seven Sisters Country Park ( $p=0.0005$ ), and  
413 Queen Elizabeth Country Park ( $p=0.0121$ ). Seven Sisters Country Park had significantly less than  
414 Queen Elizabeth Country Park ( $p=0.0029$ ). For ticks (all life stages) The Mens had significantly  
415 more ticks than Cowdray Estate ( $Z=2.128$ ,  $p=0.0013$ ) and Seven Sisters Country Park ( $p=0.000$ )  
416 which in turn had significantly less ticks than Queen Elizabeth Country Park ( $p=0.006$ ).  
417 However, unlike for nymphs, The Mens did not have significantly more ticks (all life stages) than  
418 Queen Elizabeth Country Park.

#### 419 **Habitat associations with tick hazard in the SDNP**

420 Of the four sites drag-sampled in both years, sites with transects entirely in woodland (Queen  
421 Elizabeth Country Park, The Mens) had the highest tick hazards (*Tables 2 and 3*; Supplementary  
422 Material, *Tables S2 and S3*). However, tick hazard was present at all sites, including on the  
423 grazed downland sections of the two sites (Seven Sisters Country Park and Cowdray Estate)  
424 which had transects in downland and woodland (Supplementary Material, *Tables S1 and S4*). The

425 tick hazard present was not universal in wooded sections of sites; no ticks were found in the  
426 forested part of Seven Sisters Country Park (Supplementary Material, *Table S1*). A Kruskal-  
427 Wallis Test performed on multiyear means of ticks collected (all life stages) on each habitat  
428 coded transect showed average ranks differed significantly ( $<0.05$ ) for at least one of the three  
429 coded habitat types ( $H=6.39$  (DF 2,  $n=24$ ),  $p=0.041$  (adjusted for ties)). A post-hoc Dunn's Test  
430 was used to carry out pairwise habitat type comparisons (magnitudes and directions of  
431 differences, Supplementary Material *Fig. S2*). There was not a statistically significant difference  
432 in the number of ticks (all life stages) between deciduous woodland and conifer  
433 woodland/planting. However, both these habitats had significantly more ticks than downland  
434 ( $Z=1.834$ ,  $p=0.0226$ , and  $p=0.0390$  respectively).

## 435 **DISCUSSION**

436 *Ixodes ricinus* or *H.punctata* ticks were recorded at all sites drag-sampled, on some transects in  
437 high numbers (*Fig. 3* and *4*). The extent of tick hazard differed between sites, and was  
438 significantly higher in woodland compared to grazed downland. Although it must be noted that  
439 tick hazard was still present at all downland sites. The mapping presented in this paper indicates  
440 that tick hazard is widely distributed across the SDNP, as confirmed by the deerstalker  
441 submission of ticks from sites across the National Park.

442 *Ixodes ricinus* (*Fig. 5A*) is the tick most often affecting humans and pets in the UK (Jameson &  
443 Medlock, 2011; Abdullah *et al.*, 2016; Davies *et al.*, 2017). It is therefore unsurprising it was the  
444 species most frequently recovered in the drag-sampling and deerstalker submissions, and the  
445 most spatially reported (*Fig. 6*). The larvae and nymphs of this species feed primarily on rodents  
446 and small birds, while the adults mainly parasitise larger mammals. Transovarial transmission of  
447 some pathogens can sometimes cause larvae to hatch as infectious (Hauck *et al.*, 2020). However,

448 a nymph feeding on a human will also have had opportunity to become infected when feeding as  
449 larva, and an adult will have had two blood meals, potentially from very different animals. Thus  
450 *I. ricinus* can act as a vector for the transmission of pathogens to humans from diverse taxa  
451 (Hillyard, 1996; Randolph, 2009b; Mannelli *et al.*, 2012). It is the UK's most common Lyme  
452 disease vector, followed by *I. hexagonus* (Jameson & Medlock, 2011; Medlock & Leach, 2015),  
453 and based upon the data presented here from the drag-sampling and GIS mapping, it is likely to  
454 be responsible for the majority of Lyme disease cases contracted in the SDNP. *Ixodes ricinus* has  
455 also been reported to be Europe's major tick borne encephalitis vector (Brugger *et al.*, 2017).  
456 Tick borne encephalitis virus has been detected in one of the Park's host counties, but to our  
457 knowledge no ticks within the SDNP have been tested. Layzell *et al.* (2018) drag-sampled a  
458 single site within the National Park in 2014 (West Dene, West Sussex) and isolated *Borellia*  
459 *miyamotoi* in *I. ricinus* ticks from that site. Like Lyme disease, *Borellia miyamotoi* disease is  
460 caused by *Borrelia* species, but signs and symptoms markedly differ so that it is classed  
461 separately (Telford *et al.*, 2015). In the USA, a case series of 94 individuals (identified by  
462 retrospectively testing stored patient samples) indicated a clinical presentation of chills,  
463 headache, generalised/joint pain, thrombocytopenia, and high fever. Of these people, 24% of  
464 cases required hospitalisation, and all responded well to antibiotics (Molloy *et al.*, 2015). *Borellia*  
465 *miyamotoi* disease was discovered far more recently than Lyme disease (the first confirmed  
466 Western European case was in 2013 (Fonville *et al.*, 2014)). A clear picture of disease burden in  
467 humans is, therefore, not yet available. *Borellia miyamotoi* detection in the SDNP, in what we  
468 found to be the Park's most well distributed tick vector, adds further weight to the need to  
469 conduct interventions.

470 UK countryside workers perceive spatial overlaps between widening deer abundance and  
471 *I. ricinus* (Scharlemann *et al.*, 2008), but wider ecological determinants such as host community  
472 compositions affect densities of infected ticks and thus actual disease hazard and determinants  
473 vary between site (Kurtenbach *et al.*, 1998; Keesing *et al.*, 2010). For instance, whilst deer likely  
474 have roles in most, but not all, UK Lyme disease systems (Ogden *et al.*, 1997; Gilbert *et al.*,  
475 2012) they are non-competent hosts for the pathogen; small mammals/birds are usually required  
476 as disease reservoirs (Franke, Hilebrandt & Dorn, 2013). *Ixodes ricinus* is often associated with  
477 forests (Ehrmann *et al.*, 2017), and in our fieldwork its presence and densities were highest in  
478 wooded areas. However, we also collected the species on sheep-grazed land (as elsewhere in the  
479 UK (Evans, Sheals & Macfarlane, 1968; Ogden *et al.*, 1997; Gilbert *et al.*, 2017)). Management  
480 strategies across the SDNP should take this into account, especially where downland is bounded  
481 by woods (Gilbert *et al.*, 2017).

482 *Haemaphysalis punctata*'s (Fig. 5B) continued and expanding presence in the SDNP is evident in  
483 our tick hazard mapping (Fig. 6C), raising concerns about pathogens it can vector, including  
484 *B. burgdorferi* s.l. (Tälleklint, 1996), tick-borne encephalitis virus (Estrada-Peña & Jongejan,  
485 1999), and spotted fever group rickettsiae. UK *H. punctata* testing has so far been negative for  
486 *B. burgdorferi* s.l. (Tijssse-Klasen *et al.*, 2013), to our knowledge un-conducted for tick-borne  
487 encephalitis virus (known ranges do not presently overlap), but positive for spotted fever group  
488 rickettsiae at some sites outside the Park (Tijssse-Klasen *et al.*, 2013). Spotted fever group  
489 rickettsiae are an emerging European disease threat (Lindblom *et al.*, 2013), but one that may  
490 have been present yet unidentified for some time (Vitale *et al.*, 2006). For example, *Rickettsia*  
491 *massiliae* was first identified as a human pathogen in 2005 after isolation from a clinical sample  
492 collected 20 years prior (Vitale *et al.*, 2006). Spotted fever group rickettsiae related misdiagnoses

493 and under-reporting still likely continue (Tijssse-Klasen *et al.*, 2013). *Haemaphysalis punctata* is  
494 known to parasitise humans (Hillyard, 1996) and tick submissions to Public Health England by  
495 the public show this is happening in the SDNP (Medlock *et al.*, 2018; Phipps, 2019). Sheep and  
496 cattle are its main adult hosts, others include horses, hedgehogs, rabbits, birds, goats, deer, and  
497 mustelids (Evans, Sheals & Macfarlane, 1968; Hillyard, 1996). Despite flock treatments, sheep  
498 infestation at Seven Sisters Country Park (one of the sites we collected it at) has been present for  
499 decades (personal communication with site sheep farmer, 2015; Medlock *et al.*, 2018). In 2020,  
500 11.5% of a sheep flock in the SDNP near Lewes suffered fatal tick pyaemia, the first such UK  
501 outbreak connected to *H.punctata* (Macrelli *et al.*, 2020). Also in 2020, on Brighton's downland  
502 outskirts (near the second site we collected *H.punctata*) sheep used for conservation grazing had  
503 to be removed on welfare grounds following heavy infestations with the tick (Phipps *et al.*,  
504 2020). Given these and related incidents Animal Plant Health Agency and Public Health England  
505 are investigating further in the Park and working with farmers.

506 Medlock *et al.* (2018) state that there does not generally seem to be habitat overlap in the UK  
507 between *H.punctata* and *I.ricinus*. Though Fig.6A and C show that in all 10 km<sup>2</sup> OS grid squares  
508 where *H.punctata* have been detected *I.ricinus* has also been recorded, this is not in fact in  
509 contradiction. On a finer scale of the individual sites JM drag-sampled, tick presence was either  
510 *H.punctata* or *I.ricinus*, not both. *I.ricinus* grassland preference in the UK for rough grazing is  
511 likely connected to the rapid desiccation it experiences in short grass lacking thick mats of  
512 vegetation and litter (Evans, Sheals & Macfarlane, 1968). In contrast, *H.punctata* can likely  
513 survive better in short grass, its traditional range includes deserts (Nosek, 1973). Outside the UK  
514 *H.punctata* is also found in forest (Borşan *et al.*, 2020). Whilst its established foci in the eastern  
515 Downs is relatively unwooded, if allowed to expand its range westward along the downland ridge

516 it will increasingly encounter patchworks of grazing, scrub, and woods. The two species site  
517 occupancy and host community may then begin to overlap, with implications for pathogen carry  
518 and thus hazard to humans.

### 519 **Recommendations for key locations for future interventions**

520 Queen Elizabeth Country Park: Given its high tick hazard and very high annual visitor numbers  
521 this site is the highest priority for interventions. It also lays in Hampshire where tick-borne  
522 encephalitis virus has been detected and would be a logistically simple trial setting for action  
523 which may be required elsewhere in the county. Basic measures, such as increased frequency of  
524 mowing verges (Medlock *et al.*, 2012; Del Fabbro, 2015) and leaf litter removal (Schulze, Jordan  
525 & Hung, 1995) would be implausible across the whole Country Park, but could reduce contact at  
526 small high risk plots: e.g. edges of marked picnic areas; such as along the path that goes past the  
527 visitor centre (*Fig. 3G*). It hosts large outdoor sports events, and elsewhere tick  
528 removal/submission from participants has been used to tick-sample (Hall *et al.*, 2017). Site  
529 sampling by this method would be inexpensive, and along with increased signage would raise  
530 awareness of tick presence and the value of carrying out post-activity tick-checks. These are  
531 important as early tick removal reduces transmission, and during-activity recommendations  
532 aimed at individuals to minimise exposure are unlikely to be heeded (Middleton, Cooper & Rott,  
533 2016).

534 The Mens: The site had the greatest DOT and DON, but fewest visitors. Thus though its DOT  
535 was thirty times Seven Sisters Country Park's (annual visitors, est. >300,000 (ESCC and SDCB,  
536 2004)), the tick risk to public health is far smaller. Nevertheless, signage in the carpark would be  
537 beneficial and the site could become a useful research/trial location. It's impressive beach masts  
538 (the dominant litter constituent of most of its transects) may support high rodent densities, which



539 can be very host-competent for ticks and pathogens, amplifying disease hazard (Keesing *et al.*,  
540 2009; Ostfeld *et al.*, 2014; Krawczyk *et al.*, 2020). Such a relationship has been observed in  
541 northeastern USA where high acorn masts cause subsequent year surges in rodents, followed by  
542 elevated Densities of Infected Nymphs (DIN) (Ostfeld *et al.*, 2006). Predator protection and  
543 reintroduction have been proposed as ecologically beneficial interventions (Nilsen *et al.* 2007;  
544 Levi *et al.*, 2012). For example, Hofmeester *et al.* (2017) observed an indirect negative  
545 correlation of red fox and stone marten activity with DON and DIN at forest plots across the  
546 Netherlands, and called for wider predator appreciation and protection. Tick pathogen testing  
547 could establish if the very high tick densities at The Mens are matched by high densities of  
548 infection. If so, measurement of vertebrate, especially rodent, tick and pathogen burden would  
549 determine if predator re-introduction (i.e. pine martens) and protection (i.e. foxes) should be  
550 trialed as health interventions at the site and environs. If successful, this could be extended  
551 further through the wooded wealden section of the SDNP of which it is a part. Given The Mens is  
552 a relatively large biodiverse reserve for South-East England (Whitbread, 2013), if infection  
553 densities are lower than expected based on tick densities, explanatory work could contribute to  
554 scientific debate on relationships between biodiversity and health (see: Randolph & Dobson,  
555 2012; Levy, 2013; Foley & Piovio-Scott, 2014; Civitello *et al.*, 2015).

556 Cowdray Estate and Deerstalkers: With comparably low tick hazard and fewer visitors than most  
557 other sites, the Estate itself does not need to carry out interventions to reduce site tick hazard.  
558 However, action aimed at walkers crossing Cowdray Estate and deerstalkers working in it (and  
559 by implication elsewhere under similar circumstances) is warranted. Publicly/NGO maintained  
560 car parks along the route of the South Downs Way in Cowdray Estate would benefit from tick  
561 related signage (absent during our visits). To our knowledge no study of *B.burgdorferi* s.l.

562 seropositivity or Lyme disease cases has been conducted for professional UK deerstalkers as has  
563 been for more commonly considered occupationally at risk groups such as foresters (e.g. De  
564 Keukeleire *et al.*, 2018). However, British Deer Society volunteers at multiple sites stated to the  
565 lead author of this paper that during stalking and butchery they regularly encounter ticks, often  
566 getting bitten. This statement is plausible given data presented in *Table 1* and *Fig. 7*. On a  
567 precautionary principle, professional deerstalkers would thus benefit from provision of  
568 permethrin-impregnated clothing which is effective against ticks (Faulde *et al.*, 2015), and  
569 targeted tick-related education. They would also be a priority group for future tick-related disease  
570 vaccination efforts. A vaccine against European *B.burgdorferi* s.l. strains is under development  
571 (Nayak *et al.*, 2020), and one for tick-borne encephalitis is available but only recommended at  
572 present for those doing outdoor activities in a country where tick-borne encephalitis virus is  
573 common (NHS, 2021).

574 Seven Sisters Country Park and Ditchling Beacon Nature Reserve: *Haemaphysalis punctata*'s  
575 original distribution at Cuckmere Haven and surroundings suggests importation via migratory  
576 birds (Tijssse-Klasen *et al.*, 2013), but how it is spreading westward is unclear. This may be  
577 facilitated by livestock movements (including conservation grazing (Medlock *et al.*, 2018)), birds  
578 (immature tick stages), or pets (Public Health England has received submissions taken off dogs  
579 locally (Phipps, 2019)). Public Health England and Animal Plant Health Authority are carrying  
580 out targeted surveys to determine its invasion boundary (*Fig. 6C*) and means of spread,  
581 knowledge required for effective region-level intervention. Additional work to understand its  
582 ecology and control is needed (Medlock *et al.*, 2018). Acaricide application to sheep on the  
583 Lewes site resolved the situation in-year (Phipps *et al.*, 2020). However, as the data from Seven  
584 Sisters Country Park indicates, livestock treatment alone may be insufficient, potentially because

585 *H.punctata* instars are supported by non-domestic hosts. Pasture spelling (i.e. temporary flock  
586 removal for c.6 months) is a traditional practice to reduce tick numbers (Hillyard, 1996), yet may  
587 be unsuccessful in clearing *H.punctata* from grazing land given unfed individuals can survive  
588 relatively long periods without blood meals: nymphs, 252 days; adults, 255 (Evans, Sheals &  
589 Macfarlane, 1968). Trials at Seven Sisters Country Park, Ditchling Beacon Nature Reserve, and  
590 related sites could evaluate approaches for control whilst reducing on-site tick hazards. No tick-  
591 related notices were seen during sampling or subsequent visits (up to January 2021) at either site.  
592 Instructive, but not alarming, signs could be placed in carparks at both, as has been done  
593 unobtrusively at another site, Mount Caburn, which is a less visited local site, but where  
594 *H.punctata* is also present. Notices should emphasize strongly the need for post visit checks,  
595 including vigilance over longer subsequent periods than normally recommended (*H.punctata*  
596 nymphs usually feed for one week, but may attach up to 33 days (Evans, Sheals & Macfarlane,  
597 1968)).

### 598 **Strengths and weaknesses**

599 This work is part of a regional intervention planning exercise, so findings are highly site specific  
600 limiting generalisation. However, this study may be useful as a model for intervention planning  
601 elsewhere, and the data is available for meta-analyses. One strength was deerstalker involvement,  
602 whose submissions enabled responsive site selection and contributed to SDNP wide tick hazard  
603 mapping. Another was our use of Density of Ticks, rather than only Density of Nymphs, which  
604 starting in the USA with Lyme disease is more common. *H.punctata* presence illustrates its  
605 reduced appropriateness for European work. Transovarial transmission of spotted fever group  
606 rickettsiae is established, so a hazard metric that excludes larvae (as Density of Nymphs does)  
607 will under-count vector density for spotted fever group rickettsiae and other pathogens (e.g.

608 *B.miyamotoi* (Hansford *et al.*, 2015)). Similarly, tick-borne encephalitis virus cycles require  
609 larvae-nymph co-feeding (PHE, 2019). The idea, based on US data, that transovarial transmission  
610 of *B.burgdorferi* s.l. is rare or non-existent (Ostfeld, 2011, p.43) is the main basis on which  
611 Density of Nymphs has been used for Lyme disease site hazard assessment. However, van  
612 Duijvendijk *et al.* (2016) showed a *Borellia* commonly causing Lyme disease in Europe can be  
613 transmitted by larvae, and in a UK study by Hall *et al.* (2017), 0.7% were *B.burgdorferi* s.l.  
614 positive. A study weakness concerns number and months of repeat sampling. Firstly, our first  
615 four sites were intended to be drag-sampled twice per year, for two years. However, this was not  
616 possible for one site, which was sampled three times only. Secondly, some species lifecycles  
617 cause seasonal differences in questing tick numbers/life-stage proportions. However, for  
618 logistical reasons the months' individual site samplings took place in varied. This reduces  
619 confidence in validity of site comparisons somewhat, though this is partially balanced by in-year  
620 and multiple-year repeat samplings. GIS tick hazard mapping successfully brought together all  
621 publicly available, and some unpublished, tick records from SDNP. However, to our knowledge  
622 vouchers are unavailable for the historic and pan-species records included, leaving some  
623 uncertainty regarding correct species identification. In contrast a strength of our fieldwork is our  
624 vouchers.

## 625 **Conclusions**

626 We set out to map tick hazard distribution across the SDNP, analyse habitat associations, identify  
627 and describe potential key locations for future interventions and determine their tick hazard  
628 (species and density). Against a background of increased concern about tick-borne pathogens in  
629 the UK (*B.burgdorferi* s.l., *B.miyamotoi*, *B.venatorum*, tick-borne encephalitis virus, spotted  
630 fever group rickettsiae), our mapping shows tick hazard is broadly distributed across SDNP.

631 *Ixodes ricinus* was the most common tick found, though the potential range expansion of  
632 *H.punctata* from its historic foci at SDNPs far east is concerning, not least as it seems better able  
633 to thrive on grazed downland than *I.ricinus*. Our study confirms woodland is the habitat in the  
634 SDNP most associated with tick hazard, but ticks (including *I.ricinus*) were collected on  
635 downland, and if *H.punctata* is allowed to expand its range westward, this is only likely to  
636 increase. Tick hazard does not reflect negatively on land managers, but should be a stimulus for  
637 action, especially at those sites with high tick risk: i.e. those with high DOT/DON and high  
638 visitor numbers. We identified key potential sites for interventions and based on measured tick-  
639 density, site description, and visitor levels have provided site specific recommendations for  
640 control measures (which should be evaluated in-situ during roll-out) and future research. These  
641 include targeted management at small high tick hazard plots with heavy visitor numbers (Queen  
642 Elizabeth Country Park), signage to increase awareness of post-visit precautions (all sites),  
643 repellent impregnated clothing for deerstalkers (Cowdray Estate), and flock-based experimental  
644 trials to control *H.punctata* (Seven Sisters Country Park, Ditchling Beacon Nature Reserve).  
645 Further research at one of the sites with very high tick density (The Mens) may valuably  
646 contribute to an understanding of ecological dynamics underlying infection density, and potential  
647 use of predator re-introduction and protection as a public health intervention. Ecological research  
648 on *H.punctata* would also contribute towards control strategies. Whilst interventions are  
649 necessarily site-specific, this does create the danger of implementation becoming fragmented.  
650 However, SDNPA is ideally placed to link and champion site-based and regional policies to  
651 reduce hazard, whilst avoiding or reducing conflict between public health and ecosystem health.

652

653

## 654 **Acknowledgements**

655 We thank the British Deer Society deerstalkers who submitted ticks, and organisations that  
656 enabled access to land they manage and associated data such as on visitor numbers (East Sussex  
657 County Council, Hampshire County Council, Sussex Wildlife Trust, and Cowdray Estate) and  
658 reserve pan-species records (Sussex Wildlife Trust). We are grateful to the British Deer Society  
659 grant board for methodological input, for lab support provided by technicians at Pharmacy and  
660 Biomolecular Sciences, University of Brighton, and to Jessica Stockdale who created *Fig. 7*.  
661 Finally, JM is thankful for invaluable taxonomic training and guidance provided by Professor  
662 Hans Klompen and team at Ohio State University Acarology Lab.

## 663 **Authors contributions**

664 Author contributions detailed using CRediT Contributor Taxonomy ([casrai.org/CRediT](https://casrai.org/CRediT)).  
665 Conceptualization, and funding acquisition: JM. Data curation: JM. Formal analysis: JM.  
666 Investigation: JM. Methodology: JM, IC, ASR. Supervision: IC, ASR. Writing – original draft:  
667 JM. Visualization: JM, ASR. Writing – review & editing: JM, IC, ASR.

## 668 **Funding**

669 *Tick-borne hazards in the SDNP and the potential for Planetary Health based interventions*,  
670 including this particular work, is made possible by funding from the British Deer Society,  
671 Nineveh Charitable Trust, British Ecological Society, Royal Society of Biology, and Robert  
672 Beevers Memorial Fund.

## 673 **Competing interests**

674 None declared.

675 **Ethical approval**

676 Not required.

677

678 **References**

679 Abdullah S, Helps C, Tasker S, Newbury H, Wall R. 2016. Ticks infesting domestic dogs in the  
680 UK: a large-scale surveillance programme. *Parasites & Vectors* 9:391. DOI: 10.1186/s13071-  
681 016-1673-4.

682 Andrae J. 2008. The Fallow Deer (image and license). Available at:  
683 [https://web.archive.org/web/20200930080151/https://commons.wikimedia.org/wiki/File:Fallow\\_](https://web.archive.org/web/20200930080151/https://commons.wikimedia.org/wiki/File:Fallow_deer_in_field_%28cropped%29.jpg)  
684 [deer\\_in\\_field\\_%28cropped%29.jpg](https://web.archive.org/web/20200930080151/https://commons.wikimedia.org/wiki/File:Fallow_deer_in_field_%28cropped%29.jpg) (accessed 8 October 2020).

685 Baddeley N. 2020. The biggest films ever shot in Sussex. The Argus, 25th July 2020. Available  
686 at: <https://www.theargus.co.uk/news/18594832.biggest-films-ever-shot-sussex/> (accessed 15  
687 October 2020).

688 Baker A. 1999. *Mites and ticks of domestic animals: an identification guide and information*  
689 *source*. London: Natural History Museum.

690 Bangs D. 2008. *A freedom to roam guide to the Brighton Downs*. Brighton: Dave Bangs. ISBN 0-  
691 9548638-1-X.

692 BBC. 2017. Seven Sisters cliff dangers spark foreign signage call. 17 July 2017. Available at:  
693 [https://web.archive.org/web/20201013210748/https://www.bbc.com/news/uk-england-sussex-](https://web.archive.org/web/20201013210748/https://www.bbc.com/news/uk-england-sussex-40633117)  
694 [40633117](https://web.archive.org/web/20201013210748/https://www.bbc.com/news/uk-england-sussex-40633117) (accessed 15 October 2020).

695 Beati L, Needham G, Klompen H. 2016. Ixididae: key to genera based on larvae. In: Beati L,  
696 Needham G, Klompen H, eds.. *Medical and Veterinary Acarology Tick Week 2016* [training  
697 manual]. Columbus: Ohio State University Acarology Lab.

698 Borşan SD, Toma-Naic A, Péter Á, Sándor AD, Peñatean C, Mihalca A-D. 2020. Impact of  
699 abiotic factors, habitat type and urban wildlife on the ecology of hard ticks (Acari: Ixodidae) in  
700 urban and peri-urban habitats. *Parasites & Vectors* 13:476. DOI: 10.1186/s13071-020-04352-3

701 Brugger K, Walter M, Chitimia-Dobler L, Dobler G, Rubel F. 2017. Seasonal cycles of the TBE  
702 and Lyme borreliosis vector *Ixodes ricinus* modelled with time-lagged and interval-averaged  
703 predictors. *Experimental and Applied Acarology* 73:439–450. DOI:10.1007/s10493-017-0197-8.

704 Civitello DJ, Cohen J, Fatima H, Halstead NT, Liriano J, McMahan TA, Ortega CN, Sauer ES,  
705 Sehgal T, Young S, Rohr JR. 2015. Biodiversity inhibits parasites: Broad evidence for the  
706 dilution effect. *Proceedings of the National Academy of Sciences* 112:8667–8671. DOI:  
707 10.1073/pnas.1506279112.

- 708 Cooper L, Branagan-Harris M, Tuson R, Nduka C. 2017. Lyme disease and Bell's palsy: an  
709 epidemiological study of diagnosis and risk in England. *British Journal of General Practice*  
710 67:e329–e335. DOI: 10.3399/bjgp17X690497.
- 711 Crane R, Williams R. 2013. *The natural history of the South Downs National Park*. Lewes:  
712 Sussex Archeological Society.
- 713 Cull B, Pietzsch ME, Hansford KM, Gillingham EL, Medlock JM. 2018. Surveillance of British  
714 ticks: An overview of species records, host associations, and new records of *Ixodes ricinus*  
715 distribution. *Ticks and Tick-borne Diseases* 9:605–614. DOI: 10.1016/j.ttbdis.2018.01.011.
- 716 Dantas-Torres F, Lia RP, Capelli G, Otranto D. 2013. Efficiency of flagging and dragging for  
717 tick collection. *Experimental and Applied Acarology* 61:119–27. DOI: 10.1007/s10493-013-  
718 9671-0 .
- 719 Davies S, Abdullah S, Helps C, Tasker S, Newbury H, Wall R. 2017. Prevalence of ticks and  
720 tick- borne pathogens: *Babesia* and *Borrelia* species in ticks infesting cats of Great Britain.  
721 *Veterinary Parasitology* 244:129–135. DOI: 10.1016/j.vetpar.2017.07.033.
- 722 De Keukeleire M, Robert A, Luyasu V, Kabamba B, Vanwambeke SO. 2018. Seroprevalence of  
723 *Borrelia burgdorferi* in Belgian forestry workers and associated risk factors. *Parasites & Vectors*  
724 11:277. DOI: 10.1186/s13071-018-2860-2.
- 725 Dobson ADM, Taylor JL, Randolph SE. 2011. Tick (*Ixodes ricinus*) abundance and seasonality  
726 at recreational sites in the UK: Hazards in relation to fine-scale habitat types revealed by  
727 complementary sampling methods. *Ticks and Tick-borne Diseases* 2:67–74. DOI:  
728 10.1016/j.ttbdis.2011.03.002 .
- 729 Drehmann M, Chitimia-Dobler L, Lindau A, Frank A, Mai S, Fachet K, Hauck D, Knoll S,  
730 Strube C, Lühken R, Fischer D, Ziegler L, Mackenstedt U. 2019. *Ixodes frontalis*: a neglected but  
731 ubiquitous tick species in Germany. *Experimental and Applied Acarology* 78: 79–91. DOI:  
732 10.1007/s10493-019-00375-3.
- 733 Ehrmann S, Liira J, Gärtner S, Hansen K, Brunet J, Cousins SAO, Deconchat M, Decocq G, De  
734 Frenne P, De Smedt P, Diekmann M, Gallet-Moron E, Kolb A, Lenoir J, Lindgren J, Naaf T,  
735 Taavi Paal, Valdés A, Verheyen K, Wulf M, Scherer-Lorenzen M. 2017. Environmental drivers  
736 of *Ixodes ricinus* abundance in forest fragments of rural European landscapes. *BMC Ecology*  
737 17:31. DOI: 10.1186/s12898-017-0141-0
- 738 ESCC. 2016. Countryside Access Strategy: East Sussex public rights of way and countryside  
739 sites 2016. Available at:  
740 [https://web.archive.org/web/20201014105323/https://www.eastsussex.gov.uk/media/12590/coun-](https://web.archive.org/web/20201014105323/https://www.eastsussex.gov.uk/media/12590/countryside-access-strategy.pdf)  
741 [tryside-access-strategy.pdf](https://web.archive.org/web/20201014105323/https://www.eastsussex.gov.uk/media/12590/countryside-access-strategy.pdf) (accessed 14 October 2020).
- 742 ESCC. 2020. Email to author JM from T Wallace, Communities, Economy & Transport, East  
743 Sussex County Council, Lewes, 7 October 2020.



- 744 ESCC, SDCB. 2004. *Seven Sisters Country Park Park Management Plan October 2004–March*  
745 *2007*. Lewes: East Sussex County Council.
- 746 Estrada-Peña A, Jongejan F. 1999. Ticks Feeding on Humans: A Review of Records on Human-  
747 Biting Ixodoidea with Special Reference to Pathogen Transmission. *Experimental and Applied*  
748 *Acarology* 23:685–715. DOI: 10.1023/A:1006241108739.
- 749 Estrada-Pena A, Farkas R, Jaenson TG, Koenen F, Madder M, Pascucci I, Salman M, Tarres-Call  
750 J, Jongejan F. 2013. Association of environmental traits with the geographic ranges of ticks  
751 (Acari: Ixodidae) of medical and veterinary importance in the western Palearctic. A digital data  
752 set. *Experimental and Applied Acarology* 59:351–366. DOI: 10.1007/s10493-012-9600-7.
- 753 Evans GE, Sheals JG, Macfarlane D. 1961. ‘Ticks (Metastigmata)’. In: *Terrestrial Acari of the*  
754 *British Isles: An Introduction to their Morphology, Biology and Classification, Vol. 1*. London:  
755 British Museum, 186–200.
- 756 Fonville M, Friesema IHM, Hengeveld PD, Docters Van Leeuwen A, Jahfari S, Harms MG, Van  
757 Vliet AJH, Hofhuis A, Van Pelt W, Sprong H, Van Den Wijngaard CC. 2014. Human Exposure  
758 to Tickborne Relapsing Fever Spirochete *Borrelia miyamotoi*, the Netherlands. *Emerging*  
759 *Infectious Diseases* 20:1244–1245. DOI: 10.3201/eid2007.131525.
- 760 Franke J, Hildebrandt A, Dorn W. 2013. Exploring gaps in our knowledge on Lyme borreliosis  
761 spirochaetes--updates on complex heterogeneity, ecology, and pathogenicity. *Ticks and Tick*  
762 *Borne Diseases* 4:11–25. DOI: 10.1016/j.ttbdis.2012.06.007.
- 763 Gilbert L, Bruncker K, Lande U, Klingen I, Grøva L. 2017. Environmental risk factors for Ixodes  
764 ricinus ticks and their infestation on lambs in a changing ecosystem: Implications for tick control  
765 and the impact of woodland encroachment on tick- borne disease in livestock. *Agriculture,*  
766 *Ecosystems & Environment* 237:265–273. DOI: 10.1016/j.agee.2016.12.041
- 767 Gilbert L, Maffey GL, Ramsay SL, Hester AJ. 2012. The effect of deer management on the  
768 abundance of Ixodes ricinus in Scotland. *Ecological Applications* 22:658–667. DOI: 10.1890/11-  
769 0458.1.
- 770 Gillingham EL, Hall JL, Birtles RJ, Bown KJ, Medlock JM, Smith R, Hansford KM, Warner JC,  
771 Dryden M, Pietzch ME. 2020. Study of general practitioner consultations for tick bites at high,  
772 medium and low incidence areas for Lyme borreliosis in England and Wales. *Zoonoses and*  
773 *Public Health* 67:591–599. DOI: 10.1111/zph.12694.
- 774 Gray A, Capewell P, Loney C, Katzer F, Shiels BR, Weir W. 2019. Sheep as Host Species for  
775 Zoonotic *Babesia venatorum*, United Kingdom. *Emerging Infectious Diseases* 25:2257–2260.  
776 DOI: 10.3201/eid2512.190459.
- 777 Gray JS, Estrada-Pena A, Vial L. 2014. Ecology of nidicolous ticks. In: Sonenshine DE, Roe  
778 RM, eds. *Biology of Ticks Vol. 2*. Oxford: Oxford University Press, 39–60.

- 779 Gray JS, Kahl O, Robertson JN, Daniel M, Estrada-Peña A, Gettinby G, Jaenson TGT, Jensen P,  
780 Jongejan F, Korenberg E, Kurtenbach K, Zeman P. 1998. Lyme Borreliosis Habitat Assessment.  
781 *Zentralblatt für Bakteriologie* 287:211–228. DOI: 10.1016/S0934-8840(98)80123-0.
- 782 Hall JL, Alpers K, Bown KJ, Martin SJ, Birtles RJ. 2017. Use of Mass- Participation Outdoor  
783 Events to Assess Human Exposure to Tickborne Pathogens. *Emerging Infectious Diseases*  
784 23:463–467. DOI: 10.3201/eid2303.161397.
- 785 Hansford KM, Fonville M, Jahari S, Sprong H, Medlock JM. 2015. *Borrelia miyamotoi* in host-  
786 seeking *Ixodes ricinus* ticks in England. *Epidemiology and Infection* 143:1079–87. DOI:  
787 10.1017/S0950268814001691.
- 788 Hansford KM, Gillingham EL, Cull B, McGinley L, Medlock JM, Phipps LP, Peaty M. 2019.  
789 Disease and ticks on horses. *Veterinary Record* 184:592. DOI: 10.1136/vr.l2056.
- 790 Hauck D, Jordan D, Springer A, Schunack B, Pachnicke S, Fingerle V, Strube C. 2020.  
791 Transovarial transmission of *Borrelia* spp., *Rickettsia* spp. and *Anaplasma phagocytophilum* in  
792 *Ixodes ricinus* under field conditions extrapolated from DNA detection in questing larvae.  
793 *Parasites & Vectors* 13:176. DOI: 10.1186/s13071-020-04049-7.
- 794 HCC. 2020. Email to author JM from J King, Culture, Communities and Business Services,  
795 Hampshire County Council, Winchester, 6 October 2020.
- 796 HDC. 2016. The Horsham District Economic Profile: Surveying the Current Economic Profile of  
797 Horsham District. Horsham: Horsham District Council. Available at:  
798 [https://web.archive.org/web/20201014202111/http://www.horshamblueprint.org/wp-](https://web.archive.org/web/20201014202111/http://www.horshamblueprint.org/wp-content/uploads/2017/05/Horsham-Economic-Profile-December-2016.pdf)  
799 [content/uploads/2017/05/Horsham-Economic-Profile-December-2016.pdf](https://web.archive.org/web/20201014202111/http://www.horshamblueprint.org/wp-content/uploads/2017/05/Horsham-Economic-Profile-December-2016.pdf) (accessed 14 October  
800 2020).
- 801 Hillyard PD. 1996. *Ticks of North-West Europe: keys and notes for identification of the species*.  
802 Shrewsbury: Field Studies Council.
- 803 Hofhuis A, Harms M, van den Wijngaard C, Sprong H, Pelt W. 2015. Continuing increase of tick  
804 bites and Lyme disease between 1994 and 2009. *Ticks and Tick-Borne Diseases* 6:69–74. DOI:  
805 10.1016/j.ttbdis.2014.09.006.
- 806 Hofmeester TR, Jansen PA, Wijnen HJ, Coipan EC, Fonville M, Prins HHT, Sprong H, van  
807 Wieren SE. 2017. Cascading effects of predator activity on tick-borne disease risk. *Proceedings*  
808 *of the Royal Society B* 284:20170453. DOI: 10.1098/rspb.2017.0453.
- 809 Holding M, Dowall S, Hewson R. 2020. Detection of tick-borne encephalitis virus in the UK. *The*  
810 *Lancet* 395:411. DOI: 10.1016/S0140-6736(20)30040-4.
- 811 HPA. 2010. *Epidemiology of Lyme borreliosis in the UK*. Available at:  
812 [http://webarchive.nationalarchives.gov.uk/20100415031348/http://www.hpa.nhs.uk/Topics/Infect](http://webarchive.nationalarchives.gov.uk/20100415031348/http://www.hpa.nhs.uk/Topics/InfectiousDiseases/InfectionsAZ/LymeDisease/EpidemiologicalData/lymEpidemiology/text/text/javasc)  
813 [iousDiseases/InfectionsAZ/LymeDisease/EpidemiologicalData/lymEpidemiology/text/text/javasc](http://webarchive.nationalarchives.gov.uk/20100415031348/http://www.hpa.nhs.uk/Topics/InfectiousDiseases/InfectionsAZ/LymeDisease/EpidemiologicalData/lymEpidemiology/text/text/javasc)  
814 [ript](http://webarchive.nationalarchives.gov.uk/20100415031348/http://www.hpa.nhs.uk/Topics/InfectiousDiseases/InfectionsAZ/LymeDisease/EpidemiologicalData/lymEpidemiology/text/text/javasc) (accessed 27 August 2017).

- 815 HPA. 2012. *Lyme borreliosis in England and Wales 2011*. Available at:  
816 <http://webarchive.nationalarchives.gov.uk/20120905162508/http://www.hpa.nhs.uk/Topics/InfectiousDiseases/InfectionsAZ/LymeDisease/EpidemiologicalData/lym010Lymeborreliosis2011/>  
817 (accessed 27 August 2017).  
818
- 819 HPA. 2013a. Tick distribution map: *Dermacentor reticulatus*. Available at:  
820 [https://webarchive.nationalarchives.gov.uk/20140714085900/http://www.hpa.org.uk/webw/HPAweb&HPAwebStandard/HPAweb\\_C/1317137966911](https://webarchive.nationalarchives.gov.uk/20140714085900/http://www.hpa.org.uk/webw/HPAweb&HPAwebStandard/HPAweb_C/1317137966911) (accessed 27 October 2020).  
821
- 822 HPA. 2013b. Tick distribution map: *Ixodes trianguliceps*. Available at:  
823 [https://webarchive.nationalarchives.gov.uk/20140714085905/http://www.hpa.org.uk/webw/HPAweb&HPAwebStandard/HPAweb\\_C/1317137967303](https://webarchive.nationalarchives.gov.uk/20140714085905/http://www.hpa.org.uk/webw/HPAweb&HPAwebStandard/HPAweb_C/1317137967303) (accessed 27 October 2020).  
824
- 825 HPA. 2013c. Tick distribution map: *Tick distribution map: Ixodes frontalis*. Available at:  
826 [https://webarchive.nationalarchives.gov.uk/20140714085901/http://www.hpa.org.uk/webw/HPAweb&HPAwebStandard/HPAweb\\_C/1317137966962](https://webarchive.nationalarchives.gov.uk/20140714085901/http://www.hpa.org.uk/webw/HPAweb&HPAwebStandard/HPAweb_C/1317137966962) (accessed 27 October 2020).  
827
- 828 HPA. 2013d. Tick distribution map: *Ixodes hexagonus*. Available at:  
829 [https://webarchive.nationalarchives.gov.uk/20140714085902/http://www.hpa.org.uk/webw/HPAweb&HPAwebStandard/HPAweb\\_C/1317137967012](https://webarchive.nationalarchives.gov.uk/20140714085902/http://www.hpa.org.uk/webw/HPAweb&HPAwebStandard/HPAweb_C/1317137967012) (accessed 27 October 2020).  
830
- 831 Jameson LJ, Medlock JM. 2011. Tick surveillance in Great Britain. *Vector Borne Zoonotic Diseases* 11:403–12. DOI: 10.1089/vbz.2010.0079.  
832
- 833 Keesing F, Belden L, Daszak P, Dobson A, Harvell CD, Holt R, Hudson P, Jolles A, Jones K,  
834 Mitchell C, Myers S, Bogich T, Ostfeld R. 2010. Impacts of biodiversity on the emergence and  
835 transmission of infectious diseases. *Nature* 468:647–652. DOI: 10.1038/nature09575.
- 836 Keesing F, Brunner J, Duerr S, Killilea M, Logiudice K, Schmidt K, Vuong H, Ostfeld RS. 2009.  
837 Hosts as ecological traps for the vector of Lyme disease. *Proceedings of the Royal Society B: Biological Sciences* 276:3911–3919. DOI: 10.1098/rspb.2009.1159.  
838
- 839 Killilea ME, Swei A., Lane RS, Briggs CJ, Ostfeld RS. 2008. Spatial Dynamics of Lyme  
840 Disease: A Review. *EcoHealth* 5:167–195. DOI: 10.1007/s10393-008-0171-3.
- 841 Krawczyk AI, van Duijvendijk GLA, Swart A, Heylen D, Jaarsma RI, Jacobs FHH, Fonville M,  
842 Sprong H, Takken W. 2020. Effect of rodent density on tick and tick-borne pathogen  
843 populations: consequences for infectious disease risk. *Parasites & Vectors* 13:34. DOI:  
844 10.1186/s13071-020-3902-0.
- 845 Kurtenbach K, Peacey M, Rijpkema SGT, Hoodless AN, Nuttall PA, Randolph SE. 1998.  
846 Differential Transmission of the Genospecies of *Borrelia burgdorferi* Sensu Lato by Game Birds  
847 and Small Rodents in England. *Applied Environmental Microbiology* 64:1169–1174. DOI:  
848 10.1128/AEM.64.4.1169-1174.1998.
- 849 Lawrie CH, Uzcátegui NY, Gould EA, Nuttall PA. 2004. Ixodid and Argasid Tick Species and  
850 West Nile Virus. *Emerging Infectious Diseases* 10:653–657. DOI: 10.3201/eid1004.030517.

- 851 Layzell S, Bailey D, Peacey M, Nuttall PA. 2018. Prevalence of *Borrelia burgdorferi* and *Borrelia*  
852 *miyamotoi* in questing *Ixodes ricinus* ticks from four sites in the UK. *Ticks and Tick-borne*  
853 *Diseases* 9:217–224. DOI:10.1016/j.ttbdis.2017.09.007.
- 854 Levi T, Kilpatrick AM, Mangel M, Wilmers CC. 2012. Deer, predators, and the emergence of  
855 Lyme disease. *Proceedings of the National Academy of Sciences* 109:10942–10947. DOI:  
856 10.1073/pnas.1204536109.
- 857 Levy S. 2013. The Lyme Disease Debate: Host Biodiversity and Human Disease Risk.  
858 *Environmental Health Perspectives* 121:A120–A125. DOI: 10.1289/ehp.121-a120.
- 859 Lindblom A, Wallménius K, Nordberg M, Forsberg P, Eliasson I, Pålsson C, Nilsson K. 2013.  
860 Seroreactivity for spotted fever rickettsiae and co-infections with other tick-borne agents among  
861 habitants in central and southern Sweden. *European Journal of Clinical Microbiology &*  
862 *Infectious Diseases* 32:317–323. DOI: 10.1007/s10096-012-1742-3.
- 863 Macaluso KR, Paddock CD. 2014. Tick-Borne Spotted Fever Group Rickettsioses and Rickettsia  
864 Species. In: Sonenshine DE, Roe RM, eds. *Biology of Ticks: volume 2*. Oxford: Oxford  
865 University Press, 211–250.
- 866 Macrelli M., Phipps P, McGinley L, Medlock J, Johnson N. 2020. First report of fatal tick  
867 pyaemia caused by heavy infestation with the red sheep tick, *Haemaphysalis punctata* and co-  
868 infection with *Babesia* and *Theileria* species. *Veterinary Record Case Reports* 8:e001267. DOI:  
869 10.1136/vetreccr-2020-001267.
- 870 Mannelli A, Bertolotti L, Gern L, Gray J. 2012. Ecology of *Borrelia burgdorferi* sensu lato in  
871 Europe: transmission dynamics in multi-host systems, influence of molecular processes and  
872 effects of climate change. *FEMS Microbiology Reviews* 36:837–61. DOI: 10.1111/j.1574-  
873 6976.2011.00312.x. 837-861.
- 874 Medlock JM, Handford KM, Vaux AGC, Cull B, Pietzsch ME, Gillingham EL, Johnson N, Phipp  
875 LP. 2018. Has the red sheep tick, *Haemaphysalis punctata*, recently expanded its range in  
876 England? *Medical and Veterinary Entomology* 32:473–480. DOI: 10.1111/mve.12335.
- 877 Medlock JM, Leach SA. 2015. Effect of climate change on vector-borne disease risk in the UK.  
878 *The Lancet Infectious Diseases* 15:721–730. DOI: 10.1016/S1473-3099(15)70091-5.
- 879 Middleton J, Cooper I, Rott AS. 2016. Can interventions that aim to decrease Lyme disease  
880 hazard at non-domestic sites be effective without negatively affecting ecosystem health? A  
881 systematic review protocol. *Environmental Evidence* 5:23. DOI: 10.1186/s13750-016-0074-7.
- 882 Molloy PJ, Telford SR, Chowdri HR, Lepore TJ, Gugliotta JL, Weeks KE, Hewins ME, Goethert  
883 HK, Berardi VP. 2015. *Borrelia miyamotoi* Disease in the Northeastern United States: A Case  
884 Series. *Annals of Internal Medicine* 163:91–98. DOI: 10.7326/M15-0333.
- 885 Mysterud A, Byrkjeland R, Qviller L, Viljugrein H. 2015. The generalist tick *Ixodes ricinus* and  
886 the specialist tick *Ixodes trianguliceps* on shrews and rodents in a northern forest ecosystem– a

- 887 role of body size even among small hosts. *Parasites & Vectors* 8:639. DOI: 10.1186/s13071-015-  
888 1258-7.
- 889 Natural England. 2020. Natural England Open Data – National Parks – South Downs. Available  
890 at: [https://naturalengland-defra.opendata.arcgis.com/datasets/national-parks-england?geometry=-](https://naturalengland-defra.opendata.arcgis.com/datasets/national-parks-england?geometry=-2.141%2C50.767%2C0.472%2C51.070&where=NAME%20%3D%20%27SOUTH%20DOWNS%27)  
891 [2.141%2C50.767%2C0.472%2C51.070&where=NAME%20%3D%20%27SOUTH%20DOWNS](https://naturalengland-defra.opendata.arcgis.com/datasets/national-parks-england?geometry=-2.141%2C50.767%2C0.472%2C51.070&where=NAME%20%3D%20%27SOUTH%20DOWNS%27)  
892 [%27](https://naturalengland-defra.opendata.arcgis.com/datasets/national-parks-england?geometry=-2.141%2C50.767%2C0.472%2C51.070&where=NAME%20%3D%20%27SOUTH%20DOWNS%27) (accessed 13 November 2020).
- 893 Nayak A, Schüler W, Seidel S, Gomez I, Meinke A, Comstedt P, Lundberg U. 2020. Broadly  
894 protective multivalent OspA vaccine against Lyme borreliosis, developed based on surface  
895 shaping of the C-terminal fragment. *Infection and Immunity* 88:e00917-19. DOI: 10  
896 .1128/IAI.00917-19.
- 897 NBN. 2020. National Biodiversity Network Atlas. Available at: <https://nbnatlas.org/> (accessed 15  
898 November 2020).
- 899 NE, DEFRA. 2014. Get accreditation for a country park you manage. Available at:  
900 [https://web.archive.org/web/20160630012456https://www.gov.uk/guidance/get-accreditation-for-](https://web.archive.org/web/20160630012456https://www.gov.uk/guidance/get-accreditation-for-your-country-park)  
901 [your-country-park](https://web.archive.org/web/20160630012456https://www.gov.uk/guidance/get-accreditation-for-your-country-park) (accessed 30 June 2016).
- 902 Newitt S, Elliot AJ, Morbey R, Durnall H, Pietzsch ME, Medlock JM, Leach S, Smith GE. 2016  
903 The use of syndromic surveillance to monitor the incidence of arthropod bites requiring  
904 healthcare in England, 2000–2013: a retrospective ecological study. *Epidemiology and Infection*  
905 144:2251–2259. DOI: 10.1017/S0950268816000686.
- 906 NHS. 2021. Tick-borne encephalitis (TBE). Available at:  
907 [https://web.archive.org/web/20210111061754https://www.nhs.uk/conditions/tick-borne-](https://web.archive.org/web/20210111061754https://www.nhs.uk/conditions/tick-borne-encephalitis)  
908 [encephalitis](https://web.archive.org/web/20210111061754https://www.nhs.uk/conditions/tick-borne-encephalitis) (accessed 14 January 2021).
- 909 Nilsen EB, Milner-Gulland EJ, Schofield L, Mysterud A, Stenseth NC, Coulson T. 2007. Wolf  
910 reintroduction to Scotland: public attitudes and consequences for red deer management.  
911 *Proceedings of the Royal Society B: Biological Sciences* 274:995–1003. DOI:  
912 10.1098/rspb.2006.0369.
- 913 Nosek J. 1973. Some Characteristic Features of the Life History, Ecology and Behaviour of the  
914 Ticks *Haemaphysalis Inermis*, *H. Concinna* and *H. Punctata*. In: Daniel M., Rosický B. (eds)  
915 *Proceedings of the 3rd International Congress of Acarology*. Dordrecht: Springer.  
916 [https://doi.org/10.1007/978-94-010-2709-0\\_90](https://doi.org/10.1007/978-94-010-2709-0_90).
- 917 NPUK. 2014. National Park facts and figures. Available at:  
918 [https://web.archive.org/web/20141108044959http://www.nationalparks.gov.uk/learningabout/w](https://web.archive.org/web/20141108044959http://www.nationalparks.gov.uk/learningabout/whatisanationalpark/factsandfigures)  
919 [hatisanationalpark/factsandfigures](https://web.archive.org/web/20141108044959http://www.nationalparks.gov.uk/learningabout/whatisanationalpark/factsandfigures) (accessed 8 November 2014).
- 920 NPUK. 2017. The aims and purposes of National Parks. Available at:  
921 [https://web.archive.org/web/20170827161926http://www.nationalparks.gov.uk/students/whatisa](https://web.archive.org/web/20170827161926http://www.nationalparks.gov.uk/students/whatisanationalpark/aimsandpurposesofnationalparks)  
922 [nationalpark/aimsandpurposesofnationalparks](https://web.archive.org/web/20170827161926http://www.nationalparks.gov.uk/students/whatisanationalpark/aimsandpurposesofnationalparks) (accessed 27 August 2017).

- 923 Ogden NH, Nuttall PA, Randolph SE. 1997. Natural Lyme disease cycles maintained via sheep  
924 by co-feeding ticks. *Parasitology* 115:591–599. DOI: 10.1017/s0031182097001868.
- 925 ONS. 2015. 2011 Census: Chichester (Parish). Available at:  
926 <https://web.archive.org/web/20150402154130/http://www.neighbourhood.statistics.gov.uk/dissemination/LeadKeyFigures.do?a=7&b=11121894&c=Chichester&d=16&e=62&g=6473578&i=1001x1003x1032x1004&m=0&r=1&s=1426288313078&enc=1> (accessed 14 October 2020).  
927  
928
- 929 ONS. 2020. NOMIS official labour market statistics Population estimates - small area based by  
930 single year of age - England and Wales. Available at: <http://www.nomisweb.co.uk> (accessed 14  
931 October 2020).
- 932 OS OpenData. 2020. OS OpenData Downloads. Available from:  
933 <https://osdatahub.os.uk/downloads/open> (accessed 13 November 2020).
- 934 Ostfeld RS. 2011. *Lyme Disease: The ecology of a complex system*. New York: Oxford  
935 University Press.
- 936 Ostfeld RS, Canham CD, Oggenfuss K, Winchcombe RJ, Keesing F. 2006. Climate, Deer,  
937 Rodents, and Acorns as Determinants of Variation in Lyme-Disease Risk. *PLoS Biology* 4:e145.  
938 DOI: 10.1371/journal.pbio.0040145.
- 939 Ostfeld RS, Levi T, Jolles AE, Martin LB, Hosseini PR, Keesing F. 2014. Life History and  
940 Demographic Drivers of Reservoir Competence for Three Tick-Borne Zoonotic Pathogens. *PLoS*  
941 *ONE* 9:e107387. DOI: 10.1371/journal.pone.0107387.
- 942 Pacilly FC, Benning ME, Jacobs F, Leidekker J, Sprong H, Van Wieren SE, Takken W. 2014.  
943 Blood feeding on large grazers affects the transmission of *Borrelia burgdorferi sensu lato* by  
944 *Ixodes ricinus*. *Ticks and Tick-borne Diseases* 5:810–817. DOI: 10.1016/j.ttbdis.2014.06.004.
- 945 PHE. 2016. *Ixodes ricinus* [Distribution mapping for England, Wales and Scotland, up to end of  
946 2015]. Available at:  
947 [https://web.archive.org/web/20200906091724/https://assets.publishing.service.gov.uk/government/uploads/system/uploads/attachment\\_data/file/493971/Ricinus\\_map.pdf](https://web.archive.org/web/20200906091724/https://assets.publishing.service.gov.uk/government/uploads/system/uploads/attachment_data/file/493971/Ricinus_map.pdf) (accessed 6 September  
948 2020).  
949
- 950 PHE. 2019. Human Animal Infections and Risk Surveillance (HAIRS) group: Qualitative  
951 assessment of the risk that tick-borne encephalitis presents to the UK population. Available at:  
952 [https://assets.publishing.service.gov.uk/government/uploads/system/uploads/attachment\\_data/file/832172/Tick\\_borne\\_encephalitis\\_risk\\_assessment.pdf](https://assets.publishing.service.gov.uk/government/uploads/system/uploads/attachment_data/file/832172/Tick_borne_encephalitis_risk_assessment.pdf) (accessed 6 January 2021).  
953
- 954 PHE. 2020a. Rare tick-borne infections diagnosed in England. Available at:  
955 <https://web.archive.org/web/20200820061325/https://www.gov.uk/government/news/rare-tick-borne-infections-diagnosed-in-england>  
956 (accessed 25 October 2020).

- 957 PHE. 2020b. Tick awareness and the Tick Surveillance Scheme. Available at:  
958 <https://web.archive.org/web/20201028085919/https://www.gov.uk/guidance/tick-surveillance->  
959 [scheme](https://web.archive.org/web/20201028085919/https://www.gov.uk/guidance/tick-surveillance-scheme) (accessed 28 October 2020).
- 960 Phipps P. 2019. An insight into the world of ticks. Available at:  
961 [https://webarchive.nationalarchives.gov.uk/20200608051958/https://aphascience.blog.gov.uk/201](https://webarchive.nationalarchives.gov.uk/20200608051958/https://aphascience.blog.gov.uk/2019/06/11/ticks/)  
962 [9/06/11/ticks/](https://webarchive.nationalarchives.gov.uk/20200608051958/https://aphascience.blog.gov.uk/2019/06/11/ticks/) (accessed 6 November 2020).
- 963 Phipps P, Johnson N, Macrelli M, Pile N, McGinley L, Hansford K, Medlock J. 2020. Expansion  
964 of red sheep tick range in England. *Veterinary Record* 186: 651-652. DOI: 10.1136/vr.m2496.
- 965 Pietzsch ME, Medlock JM, Jones L, Avenell D, Abbott J, Harding P, Leach S. 2005. Distribution  
966 of *Ixodes ricinus* in the British Isles: investigation of historical records. *Medical and Veterinary*  
967 *Entomology* 19:306–314. DOI: 10.1111/j.1365-2915.2005.00575.x.
- 968 Randolph SE. 2009a. Perspectives on climate change impacts on infectious diseases. *Ecology*  
969 90:927–931. DOI: 10.1890/08-0506.1.
- 970 Randolph SE. 2009b. Tick-borne disease systems emerge from the shadows: the beauty lies in  
971 molecular detail, the message in epidemiology. *Parasitology* 136:1403–1413. DOI:  
972 10.1017/S0031182009005782.
- 973 Randolph SE, Dobson ADM. 2012. Pangloss revisited: a critique of the dilution effect and the  
974 biodiversity-buffers-disease paradigm. *Parasitology* 139:847–863. DOI:  
975 10.1017/S0031182012000200.
- 976 Tälleklint L. 1996. Lyme borreliosis spirochetes in *Ixodes ricinus* and *Haemaphysalis punctata*  
977 ticks (Acari: Ixodidae) on three islands in the Baltic Sea. *Experimental & Applied Acarology*  
978 20:467–476. DOI: 10.1007/BF00053310.
- 979 Telford SR, Goethert HK, Molloy PJ, Berardi VP, Chowdri HR, Gugliotta JL, Lepore TJ. 2015.  
980 *Borrelia miyamotoi* Disease: Neither Lyme Disease Nor Relapsing Fever. *Clinics in laboratory*  
981 *medicine* 35:867. DOI: 10.1016/j.cll.2015.08.002.
- 982 Tsang A. 2018. How Asian Social Media Transformed a Quiet U.K. Walking Spot. New York  
983 Times, 12 October 2018. Available at:  
984 [https://web.archive.org/web/20201015184454/https://www.nytimes.com/2018/10/12/world/europ](https://web.archive.org/web/20201015184454/https://www.nytimes.com/2018/10/12/world/europe/seven-sisters-cliffs-tourism-pictures.html)  
985 [e/seven-sisters-cliffs-tourism-pictures.html](https://web.archive.org/web/20201015184454/https://www.nytimes.com/2018/10/12/world/europe/seven-sisters-cliffs-tourism-pictures.html) (accessed 15 October 2020).
- 986 Tijssse-Klasen E, Hansford, KM, Jahfari S, Phipps P, Sprong H, Medlock JM. 2013. Spotted  
987 fever group rickettsiae in *Dermacentor reticulatus* and *Haemaphysalis punctata* ticks in the UK.  
988 *Parasites & Vectors* 6:212–212. DOI: 10.1186/1756-3305-6-212 .
- 989 Tijssse-Klasen E, Jameson LJ, Fonville M, Leach S, Sprong H and Medlock JM. 2011. First  
990 detection of spotted fever group rickettsiae in *Ixodes ricinus* and *Dermacentor reticulatus* ticks in  
991 the UK. *Epidemiology and Infection* 139:524–529. DOI: 10.1017/S0950268810002608 .

- 992 Scharlemann JPW, Johnson PJ, Smith AA, Macdonald DW, Randolph SE. 2008. Trends in  
993 ixodid tick abundance and distribution in Great Britain. *Medical and Veterinary Entomology*  
994 22:238–247. DOI: 10.1111/j.1365-2915.2008.00734.x.
- 995 Schulze TL, Jordan RA, Hung RW. 1995. Suppression of subadult *Ixodes Scapularis* (Acari,  
996 Ixodidae) following removal of leaf litter. *Journal of Medical Entomology* 32:730–733. DOI:  
997 10.1093/jmedent/32.5.730.
- 998 SDNPA. 2020. South Downs National Park - Key Facts. Available at:  
999 [https://web.archive.org/web/20201020195719/https://www.southdowns.gov.uk/our-history/key-](https://web.archive.org/web/20201020195719/https://www.southdowns.gov.uk/our-history/key-facts/)  
1000 [facts/](https://web.archive.org/web/20201020195719/https://www.southdowns.gov.uk/our-history/key-facts/) (accessed 20 October 2020).
- 1001 SDS. 2021. Making the Most of CROW Open Access in the South Downs. Available at:  
1002 [https://web.archive.org/web/20210322123851/https://friendsofthesouthdowns.org.uk/about-](https://web.archive.org/web/20210322123851/https://friendsofthesouthdowns.org.uk/about-us/how-we-do-it/access/making-the-most-of-crow-open-access-in-the-south-downs/)  
1003 [us/how-we-do-it/access/making-the-most-of-crow-open-access-in-the-south-downs/](https://web.archive.org/web/20210322123851/https://friendsofthesouthdowns.org.uk/about-us/how-we-do-it/access/making-the-most-of-crow-open-access-in-the-south-downs/) (accessed 22  
1004 March 2021).
- 1005 Sood SK, O'Connell S, Weber K. 2011. The Emergence and Epidemiology of Lyme Borreliosis  
1006 in Europe and North America. In: Sood SK, ed. *Lyme borreliosis in Europe and North America: epidemiology and clinical practice*. Hoboken: Wiley-Blackwell.
- 1008 Stanek G, Wormser GP, Gray J, Strle F. 2012. Lyme borreliosis. *The Lancet* 379:461–473. DOI:  
1009 10.1016/S0140-6736(11)60103-7.
- 1010 TTC. 2018. South Downs National Park Visitor Market Proposition Final Report - 2018.  
1011 Available at:
- 1012 [https://web.archive.org/web/20201016142017/https://www.southdowns.gov.uk/wp-](https://web.archive.org/web/20201016142017/https://www.southdowns.gov.uk/wp-content/uploads/2018/05/South-Downs-National-Park-Customer-Segmentation-and-Market-Propositions-2018.pdf)  
1013 [content/uploads/2018/05/South-Downs-National-Park-Customer-Segmentation-and-Market-](https://web.archive.org/web/20201016142017/https://www.southdowns.gov.uk/wp-content/uploads/2018/05/South-Downs-National-Park-Customer-Segmentation-and-Market-Propositions-2018.pdf)  
1014 [Propositions-2018.pdf](https://web.archive.org/web/20201016142017/https://www.southdowns.gov.uk/wp-content/uploads/2018/05/South-Downs-National-Park-Customer-Segmentation-and-Market-Propositions-2018.pdf) (accessed 16 October 2020).
- 1015 Van Duijvendijk G, Coipan C, Wagemakers A, Fonville M, Ersöz J, Oei A, Földvári G, Hovius J,  
1016 Takken W, Sprong H. 2016. Larvae of *Ixodes ricinus* transmit *Borrelia afzelii* and *B. miyamotoi*  
1017 to vertebrate hosts. *Parasites & Vectors* 9:97. DOI: 10.1186/s13071-016-1389-5
- 1018 Vitale G, Mansueto S, Rolain JM, Raoult D. 2006. *Rickettsia massiliae* Human Isolation.  
1019 *Emerging Infectious Diseases*:174–175. DOI: 10.3201/eid1201.050850.
- 1020 Vollmer SA, Bormane A, Dinnis RE, Seelig F, Dobson AD, Aanensen DM, James MC, Donaghy  
1021 M., Randolph SE, Feil EJ, Kurtenbach K, Margos G. 2011. Host migration impacts on the  
1022 phylogeography of Lyme Borreliosis spirochaete species in Europe. *Environmental Microbiology*  
1023 13:184–92. DOI: 10.1111/j.1462-2920.2010.02319.x.
- 1024 Weir W, Gray A, Shiels B, Katzer F. 2020. *Babesia venatorum* has not ‘just arrived’ in the UK  
1025 *Veterinary Record* 186:96–97. DOI: 10.1136/vr.m219.



1026 Whitbread T. 2013. A present day wildwood. Available at:  
1027 [https://web.archive.org/web/20201027145549/https://sussexwildlifetrust.org.uk/news/a-present-](https://web.archive.org/web/20201027145549/https://sussexwildlifetrust.org.uk/news/a-present-day-wildwood-nearly)  
1028 [day-wildwood-nearly](https://web.archive.org/web/20201027145549/https://sussexwildlifetrust.org.uk/news/a-present-day-wildwood-nearly) (accessed 27 October 2020).

1029

1030 **TABLES**

1031 **Table 1:**

1032 **Ticks submitted by deerstalkers.**

1033 Deer culled for reasons unrelated to this project. Percentages rounded to whole numbers. Engorged status  
1034 covers adult females and nymphs only, as adult males do not engorge. \*in addition the single nymph was  
1035 engorged.

|                                            | n=87 | Tick (%) |
|--------------------------------------------|------|----------|
| <b>Tick species</b>                        |      |          |
| <i>Ixodes ricinus</i>                      | 87   | (100)    |
| <b>Tick life stage and sex</b>             |      |          |
| Adult females                              | 71   | (82)     |
| Adult males                                | 15   | (17)     |
| Nymph                                      | 1    | (1)      |
| Larvae                                     | 0    | (0)      |
| <b>Female Engorgement (n=71)</b>           |      |          |
| Females engorged*                          | 52   | (73)     |
| Females not engorged                       | 19   | (27)     |
| Not recorded                               | 2    | (3)      |
| <b>Habitat</b>                             |      |          |
| Wood                                       | 51   | (59)     |
| Wood-chalk grassland                       | 15   | (17)     |
| Wood-pasture                               | 7    | (8)      |
| Pasture                                    | 6    | (7)      |
| Wood-arable                                | 3    | (3)      |
| Wood-heath                                 | 3    | (3)      |
| Other                                      | 2    | (2)      |
| <b>Host species</b>                        |      |          |
| Fallow deer, <i>Dama dama</i> (n=10)       | 45   | (52)     |
| Roe deer, <i>Capreolus capreolus</i> (n=3) | 38   | (44)     |
| Not recorded (host n=1)                    | 4    | (5)      |
| <b>Range of ticks per host</b>             | 1-35 |          |

1036

1037 **Table 2:**  
 1038 **Ticks collected by site drag sampling.**  
 1039 Results of individual samplings in Supplementary Material, *Tables S1-4*.

|                                                                                                             | Species            | Collected on  | On-transect         |            |           |            | Off-transect        |            |           |            | Site Totals |
|-------------------------------------------------------------------------------------------------------------|--------------------|---------------|---------------------|------------|-----------|------------|---------------------|------------|-----------|------------|-------------|
|                                                                                                             |                    |               | Life stages and sex |            |           |            | Life stages and sex |            |           |            |             |
|                                                                                                             |                    |               | Larvae              | Nymphs     | Adults    | Totals     | Larvae              | Nymphs     | Adults    | Totals*    |             |
| <b>Seven Sisters Country Park</b><br>Six 50m <sup>2</sup> transects, each sampled four times over y1 & 2.   | <i>I. ricinus</i>  | Blanket       |                     | 2          |           |            | 65                  | 8          | 1♀        | 74         | 78          |
|                                                                                                             |                    | Chaps         |                     |            | 2♀        | 4          |                     |            |           |            |             |
|                                                                                                             |                    | Flags         |                     |            |           |            |                     |            |           |            |             |
| <b>Queen Elizabeth Country Park</b><br>Six 50m <sup>2</sup> transects, each sampled four times over y1 & 2. | <i>H. punctata</i> | Blanket       | 37                  | 39         | 1♀<br>4♂  |            | 25                  | 65         | 3♀<br>1♂  | 94         | 183         |
|                                                                                                             |                    | Chaps         |                     | 8          |           | 89         |                     |            |           |            |             |
|                                                                                                             |                    | Flags         |                     |            |           |            |                     |            |           |            |             |
| <b>The Mens</b><br>Six 50m <sup>2</sup> transects, each sampled four times over y1 & 2.                     | <i>I. ricinus</i>  | Blanket       | 35                  | 78         | 1♀<br>3♂  |            | 100                 | 104        | 2♀<br>3♂  | 209        | 330         |
|                                                                                                             |                    | Chaps         |                     | 4          |           | 121        |                     |            |           |            |             |
|                                                                                                             |                    | Flags         |                     |            |           |            |                     |            |           |            |             |
| <b>Cowdray Estate</b><br>Six 50m <sup>2</sup> transects, each sampled three times over y1 & 2.              | <i>I. ricinus</i>  | Blanket       |                     | 21         | 1♂        |            | 3                   | 5          |           | 8          | 31          |
|                                                                                                             |                    | Chaps         |                     | 1          |           | 23         |                     |            |           |            |             |
|                                                                                                             |                    | Flags         |                     |            |           |            |                     |            |           |            |             |
| <b>Ditchling Beacon Nature Reserve</b><br>Six 50m <sup>2</sup> transects, each sampled twice in y2.         | <i>H. punctata</i> | Blanket       |                     |            | 1♂        |            |                     |            |           | 0          | 1           |
|                                                                                                             |                    | Chaps         |                     |            |           | 1          |                     |            |           |            |             |
|                                                                                                             |                    | Flags         |                     |            |           |            |                     |            |           |            |             |
|                                                                                                             |                    | <b>Totals</b> | <b>72</b>           | <b>153</b> | <b>13</b> | <b>238</b> | <b>193</b>          | <b>182</b> | <b>10</b> | <b>385</b> | <b>623</b>  |

1040

1041 **Table 3:**  
1042 **Tick hazard and visitors observed during transect drag sampling.**  
1043 Results of individual samplings in Supplementary Material, *Tables S1-4*.

|                              | <b>Visitor numbers observed</b> | <b>Tick species</b> | <b>Ticks found on transects</b> | <b>Ticks per individual 50 m<sup>2</sup> sampling</b> | <b>Site Density of Nymphs (DON)</b> | <b>Site Density of Ticks (DOT)</b> |
|------------------------------|---------------------------------|---------------------|---------------------------------|-------------------------------------------------------|-------------------------------------|------------------------------------|
| The Mens                     | Low to none                     | <i>I. ricinus</i>   | 121                             | 0–21                                                  | 30/300 m <sup>2</sup>               | 30/300 m <sup>2</sup>              |
| Queen Elizabeth Country Park | Very high                       | <i>I. ricinus</i>   | 89                              | 0–25                                                  | 12/300 m <sup>2</sup>               | 22/300 m <sup>2</sup>              |
| Cowdray Estate               | Low                             | <i>I. ricinus</i>   | 23                              | 0–7                                                   | 6/300 m <sup>2</sup>                | 8/300 m <sup>2</sup>               |
| Seven Sisters Country Park   | Very high                       | <i>H. punctata</i>  | 4                               | 0–2                                                   | 1/300 m <sup>2</sup>                | 1/300 m <sup>2</sup>               |
| Ditchling Beacon             | Moderate                        | <i>H. punctata</i>  | 1                               | 0–1                                                   | n/a                                 | n/a                                |

1044

1045 **FIGURES**

1046 [Placed in Materials and Methods]

1047 **Figure 1: Site tick-sampling equipment.**

1048 JM drag-sampling along a path border at The Mens, West Sussex. (A) Woollen blanket. (B)  
1049 Woollen chaps. (C) Woollen flags. Design as per Dobson, Taylor & Randolph (2011). Photo:  
1050 ASR.

1051 [Placed in results]

1052 **Figure 2: Tick sample collection sites in the South Downs National Park.**

1053 Sites where ticks had been submitted by deerstalkers or drag-sampled by JM marked by points at  
1054 100 m<sup>2</sup> resolution. All ticks collected from deer were *Ixodes ricinus*, which was also the only tick  
1055 species drag-sampled at Queen Elizabeth Country Park, Cowdray Estate, and The Mens.  
1056 *Haemaphysalis punctata* was the only tick drag-sampled at Seven Sisters Country Park and  
1057 Ditchling Beacon Nature Reserve. Map contains OS data © Crown Copyright (OS OpenData,  
1058 2020) and a National Park base layer (unmodified) from Natural England (2020)  
1059 (<https://creativecommons.org/licenses/by-nc-nd/2.0/>). Map: JM.

1060 **Figure 3: Seven Sisters Country Park, and Queen Elizabeth Country Park.**

1061 Both sites sampled twice each in 2015 and 2016. Where ticks were present along 50m<sup>2</sup> transects  
1062 2-year totals are given (individual samplings in brackets). Photos: JM.

1063 **Figure 4: The Mens, and Cowdray Estate.**

1064 Both sites sampled twice each in 2015 and 2016. Where ticks were present along 50m<sup>2</sup> transects  
1065 2-year totals are given (individual samplings in brackets). Photos: JM.

1066 **Figure 5: Tick species collected.**

1067 Ticks collected during study. (A) *Ixodes ricinus* (drag-sampled at The Mens, West Sussex, 2016).  
1068 (B) *Haemaphysalis punctata* (drag-sampled at Ditchling Beacon Nature Reserve, East Sussex,  
1069 2016). Photos: JM.

1070 **Figure 6: Recorded tick hazard in the South Downs National Park.**

1071 (A) *Ixodes ricinus*. (B) *Ixodes hexagonus*. (C) *Haemaphysalis punctata*. (D) *Dermacentor*  
1072 *reticulatus*. Orange OS grid squares indicate the most recent record/s of tick presence are since  
1073 2005 (inclusive). Yellow squares indicate the most recent record/s found were prior to 2005  
1074 (latest record date shown). Empty squares represent no records found, but should not be taken as  
1075 on-the-ground tick absence. Map combines our data of drag-sampling and ticks submitted from  
1076 culled deer, national maps from the Public Health England/Health Protection Agency tick  
1077 surveillance scheme (Cull *et al.*, 2018; PHE, 2016; HPA, 2013a, 2013b, 2013c, 2013d), the  
1078 National Biodiversity Network Atlas (NBN, 2020), Medlock *et al.* (2018), Layzell *et al.* (2018),  
1079 and previously unpublished records from pan-species surveying at Sussex Wildlife Trust  
1080 reserves. In addition, a case report by Phipps *et al.* (2020) states there were *H.punctata*  
1081 infestations within the confines of Brighton & Hove in 2019. Maps contain OS data © Crown  
1082 Copyright (OS OpenData, 2020) and a National Park base layer (unmodified) from Natural  
1083 England (2020) (<https://creativecommons.org/licenses/by-nc-nd/2.0/>). Maps: JM.

1084 **Figure 7: Tick attachment sites on sentinel deer**

1085 Ticks collected by British Deer Society members from deer culled for other reasons, attachment  
1086 sites for four ticks not recorded. Body zones as per Pacilly *et al.* (2014) \*Instructions listed  
1087 abdomen and sternum as separate zones to record, but for 10 ticks this was not done so zones  
1088 were merged in this figure (reported attachment sites: abdomen, 24; sternum and abdomen, 10;

1089 sternum, 1). Photo: Johann-Nikolaus Andreae (2008), use and changes made under CC-BY-SA-  
1090 2.0 which also applies to this figure. Original:  
1091 [https://web.archive.org/web/20200930080151/https://commons.wikimedia.org/wiki/File:Fallow\\_](https://web.archive.org/web/20200930080151/https://commons.wikimedia.org/wiki/File:Fallow_deer_in_field_%28cropped%29.jpg)  
1092 [deer\\_in\\_field\\_%28cropped%29.jpg](https://web.archive.org/web/20200930080151/https://commons.wikimedia.org/wiki/File:Fallow_deer_in_field_%28cropped%29.jpg).

1093 **Figure 8: Life stages of ticks collected along study transects by month.**

1094 2015 and 2016: Seven Sisters Country Park, Queen Elizabeth Country Park, The Mens, Cowdray  
1095 Estate. 2016 only: Ditchling Beacon Nature Reserve. Nymphal and larval proportions in  
1096 sampling months partly reflect *Ixodes ricinus* annual lifecycles, and are not presented to indicate  
1097 changing *quantity* of hazard, as monthly total differences may be partly explained by which sites,  
1098 and how many, were visited.

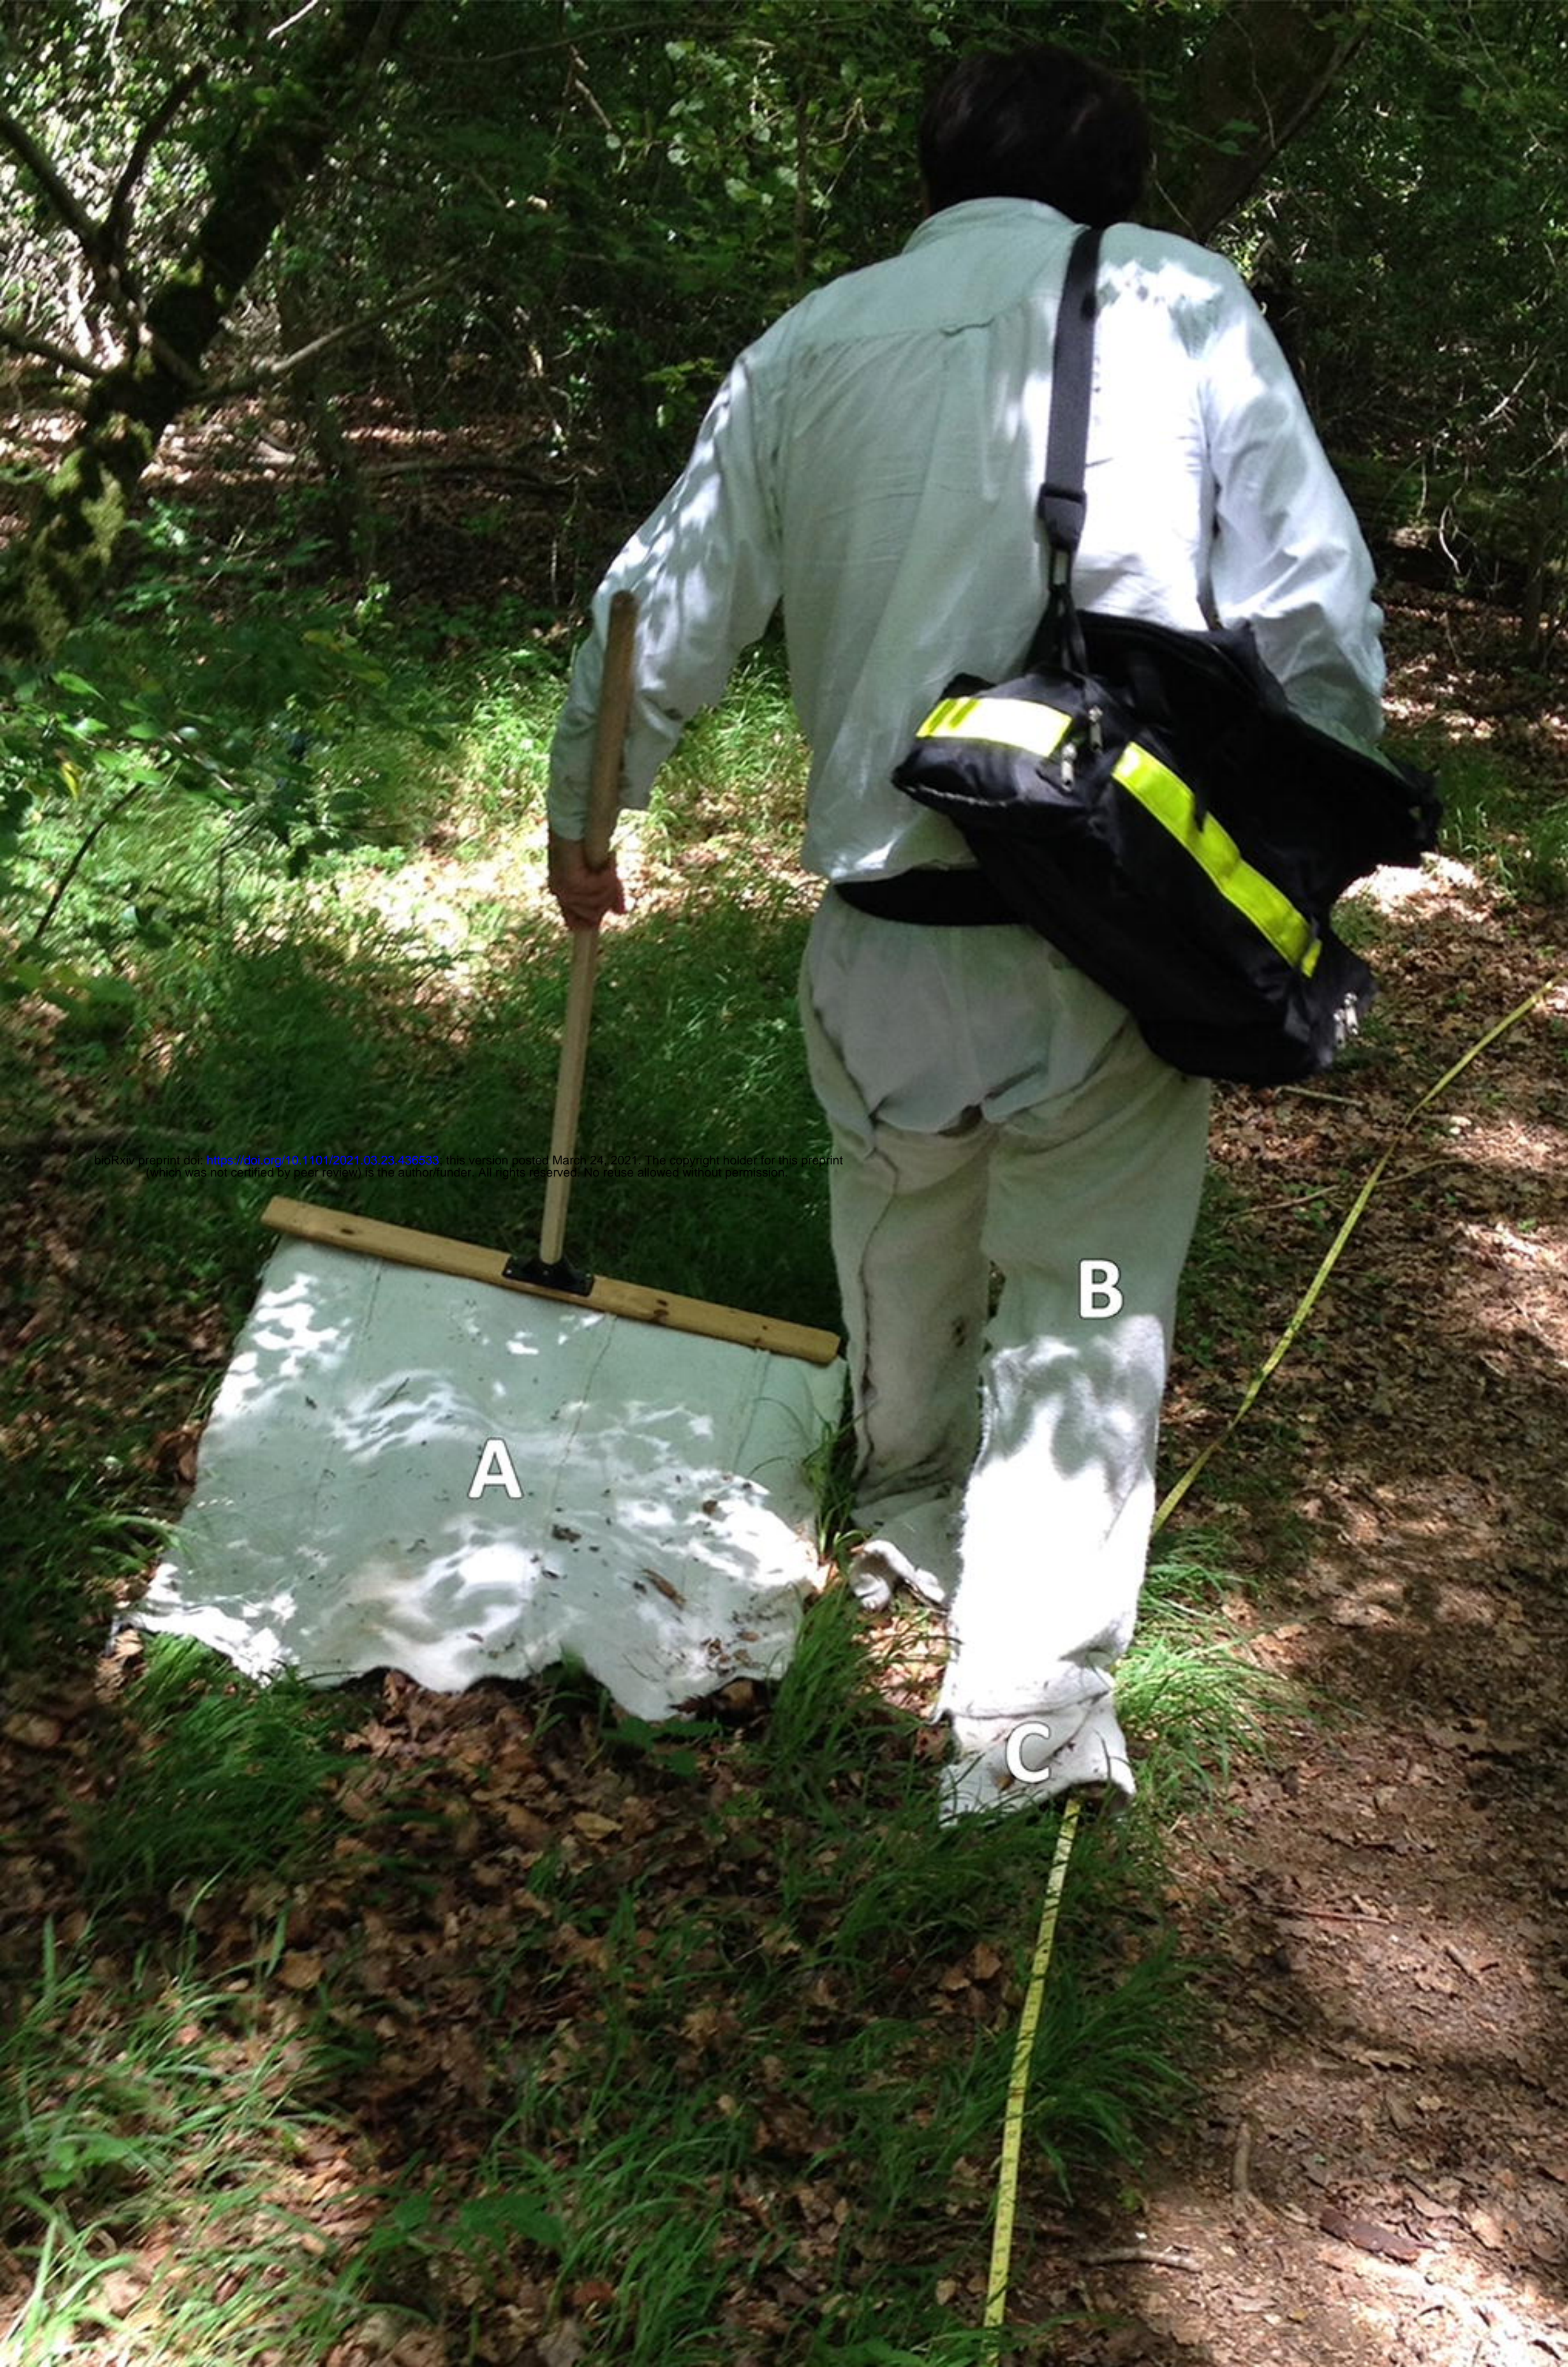

bioRxiv preprint doi: <https://doi.org/10.1101/2021.03.23.436533>; this version posted March 24, 2021. The copyright holder for this preprint (which was not certified by peer review) is the author/funder. All rights reserved. No reuse allowed without permission.



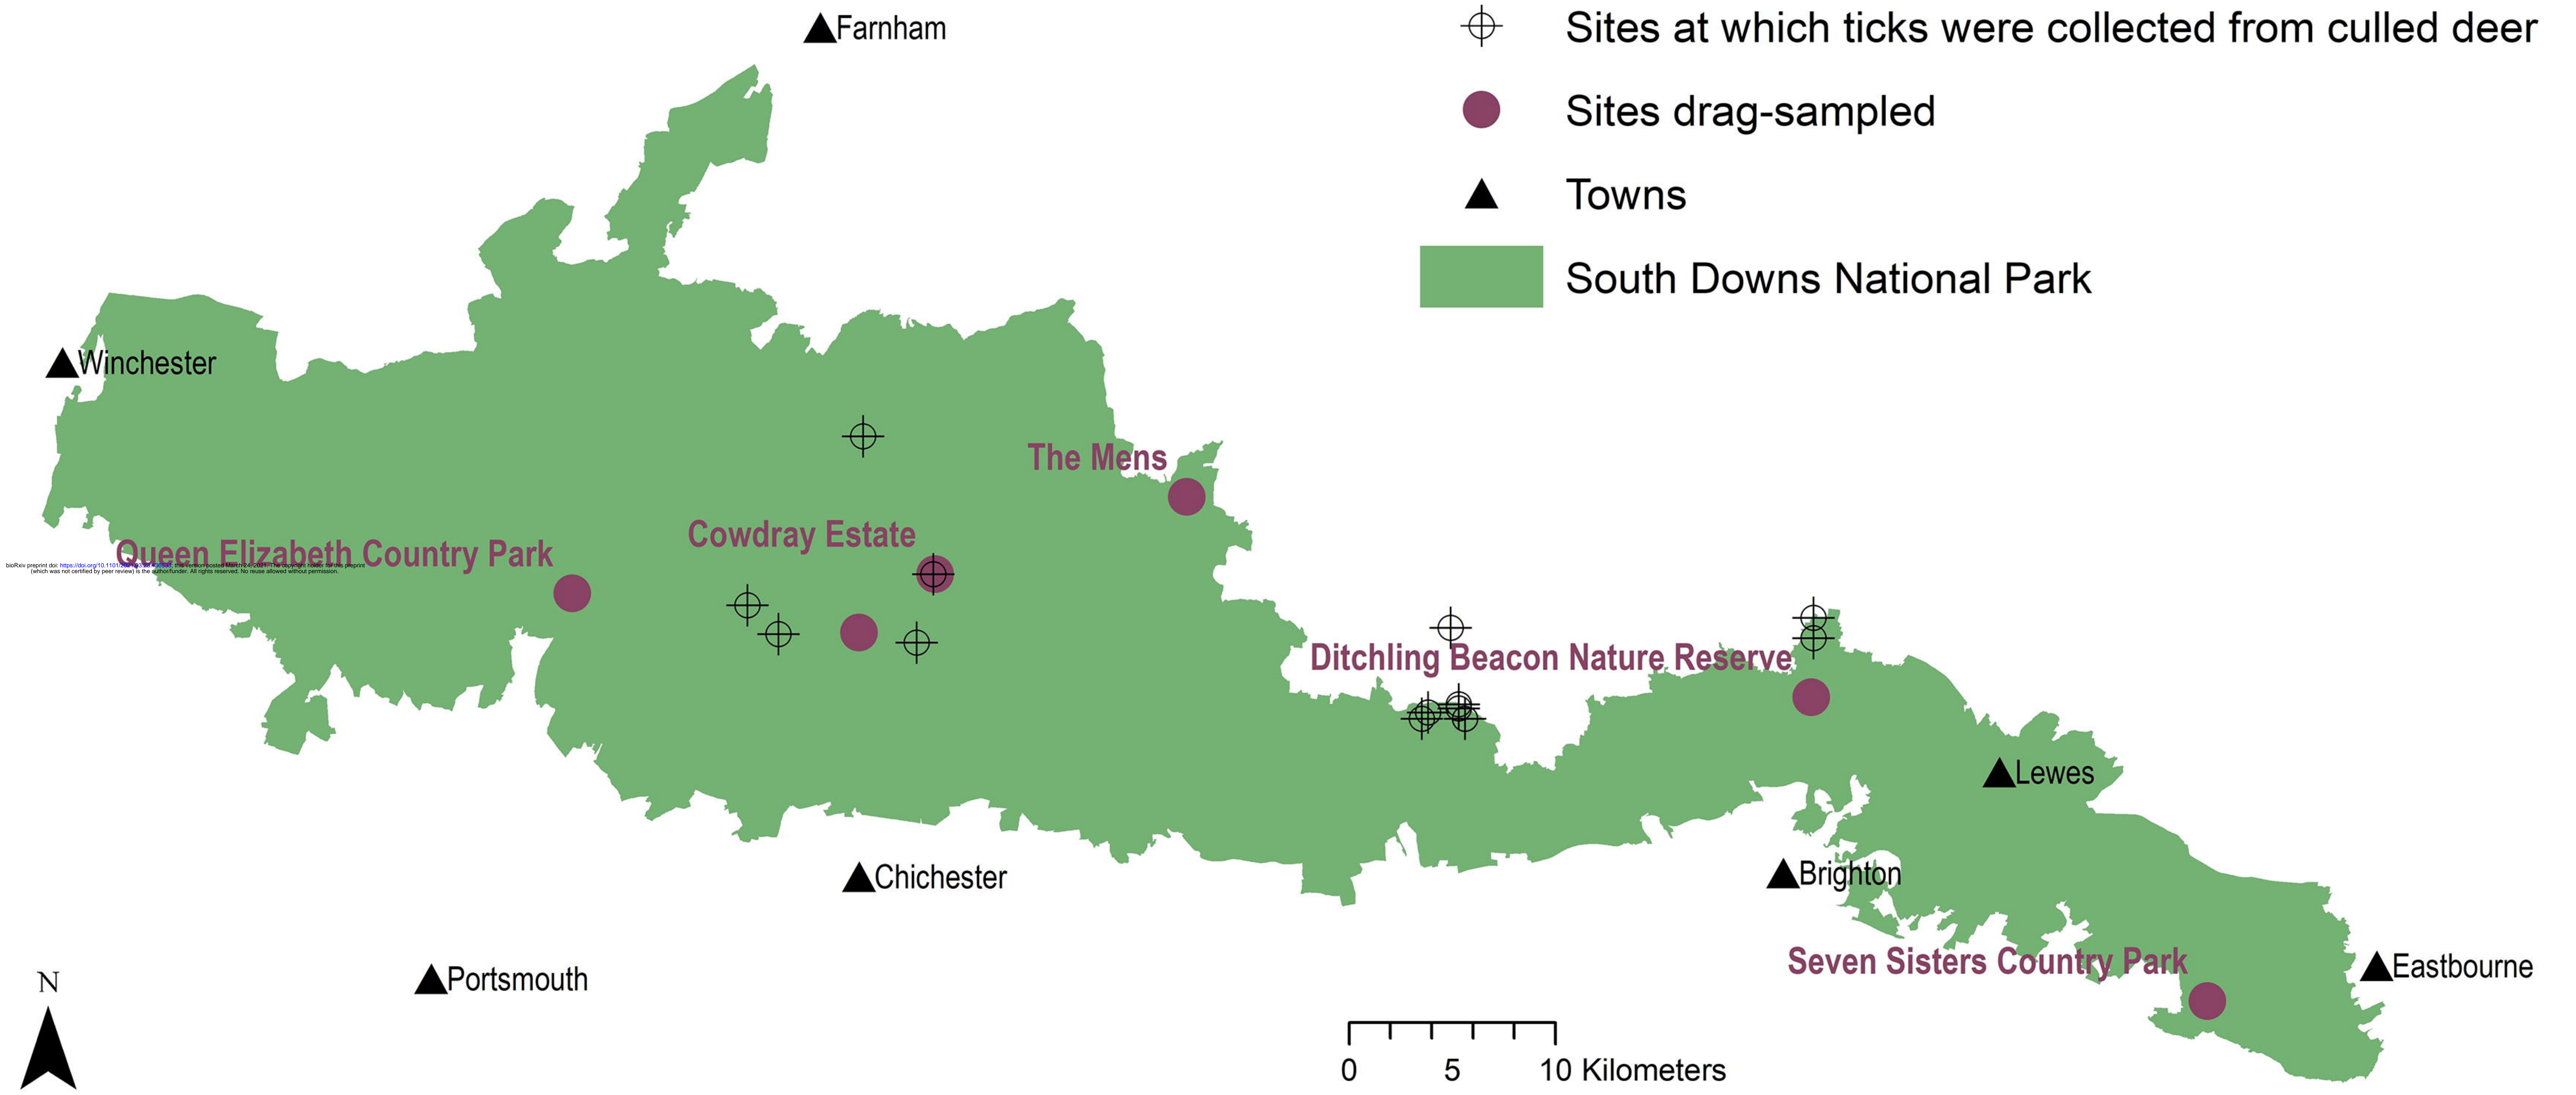

SEVEN SISTERS  
COUNTRY PARK

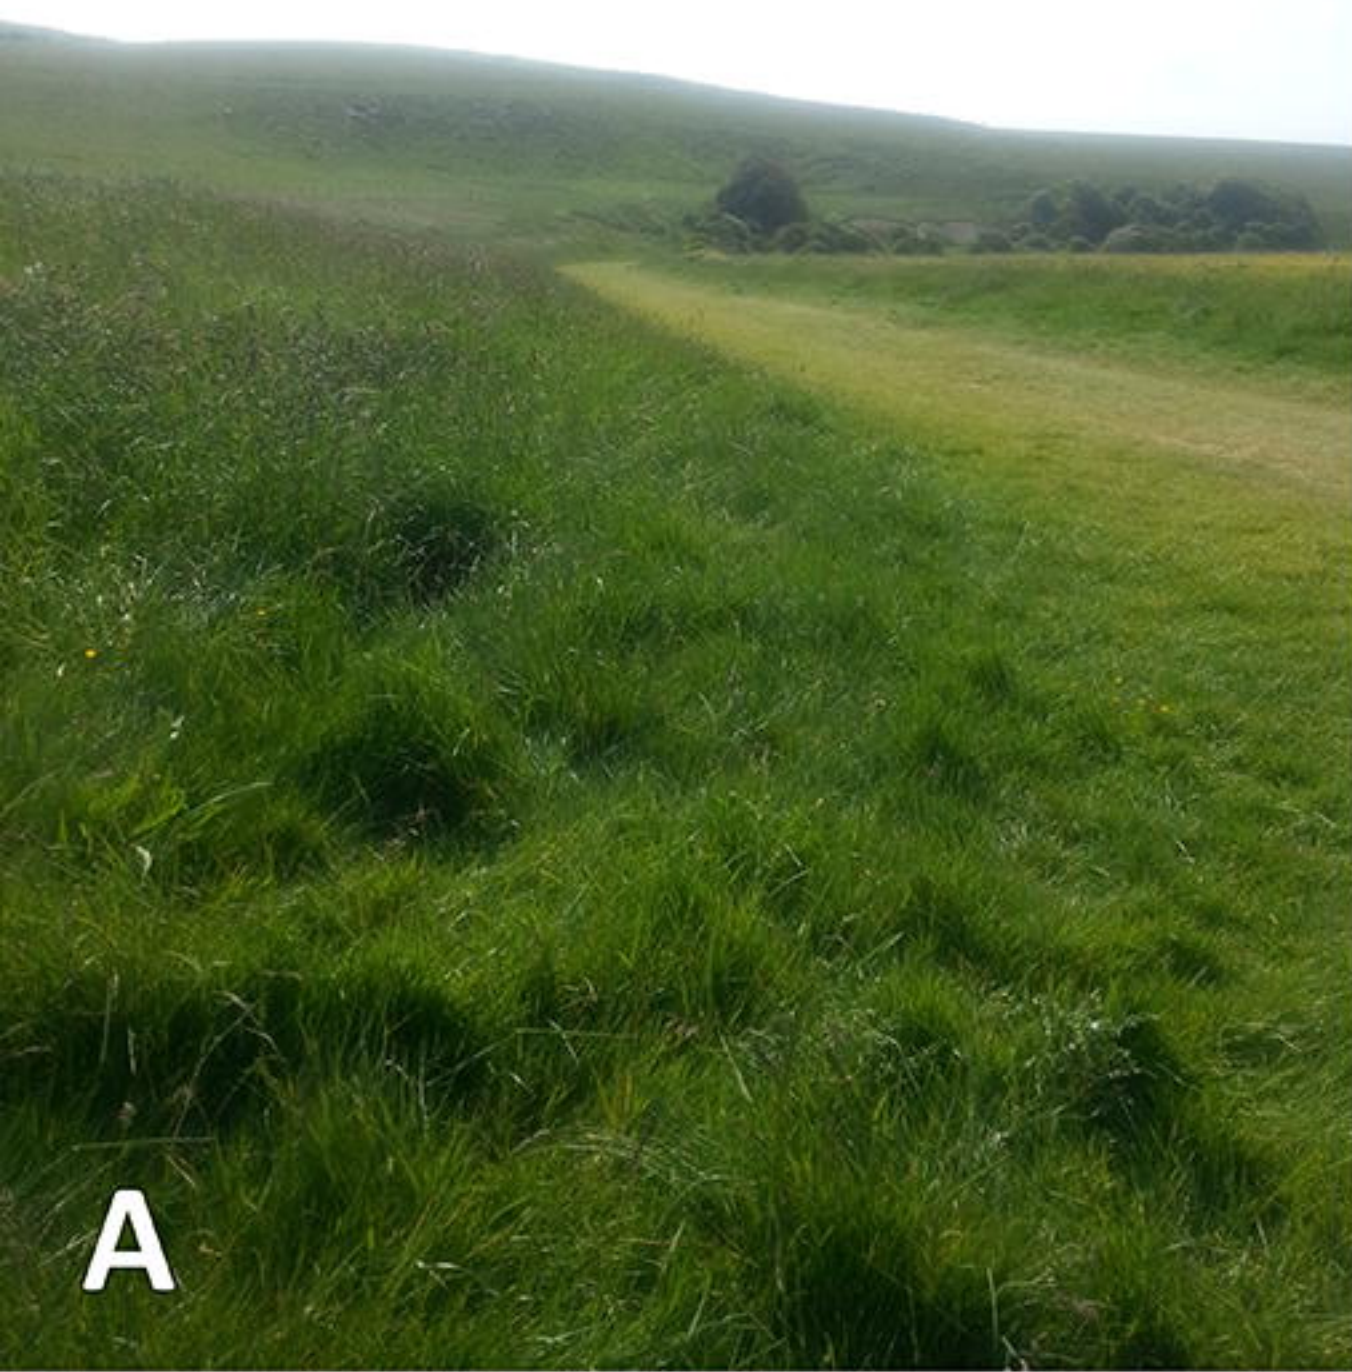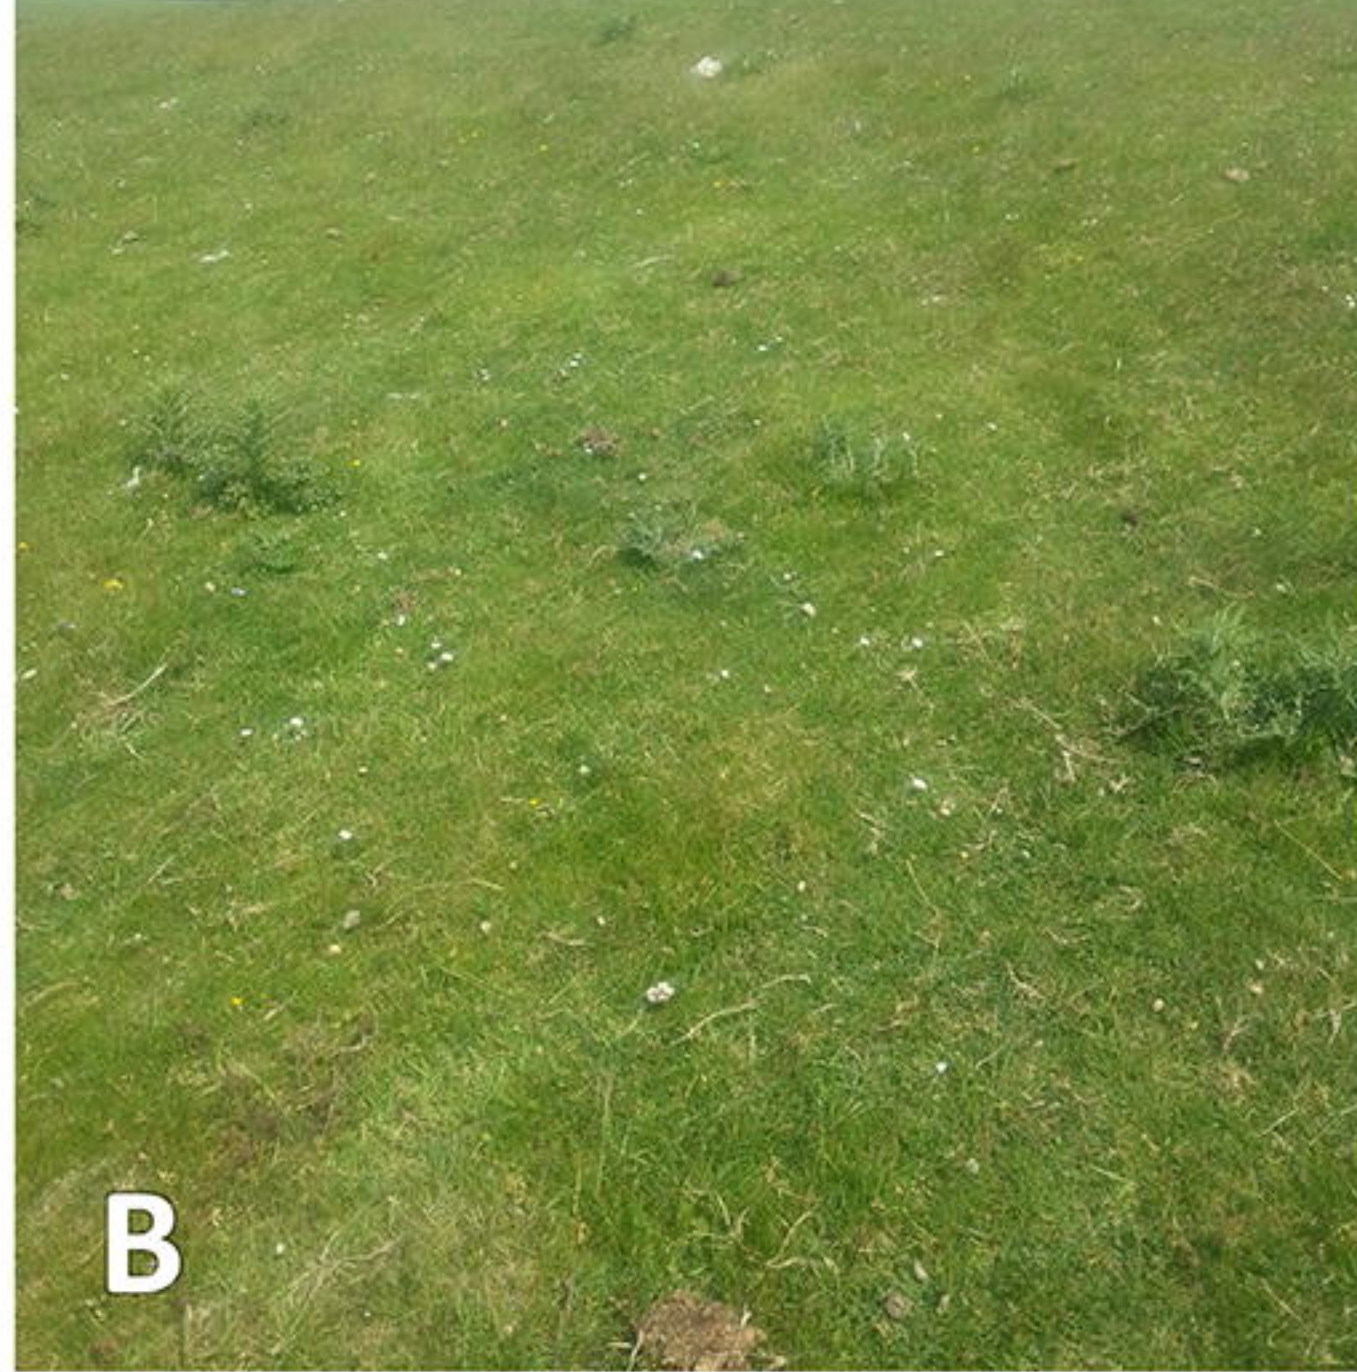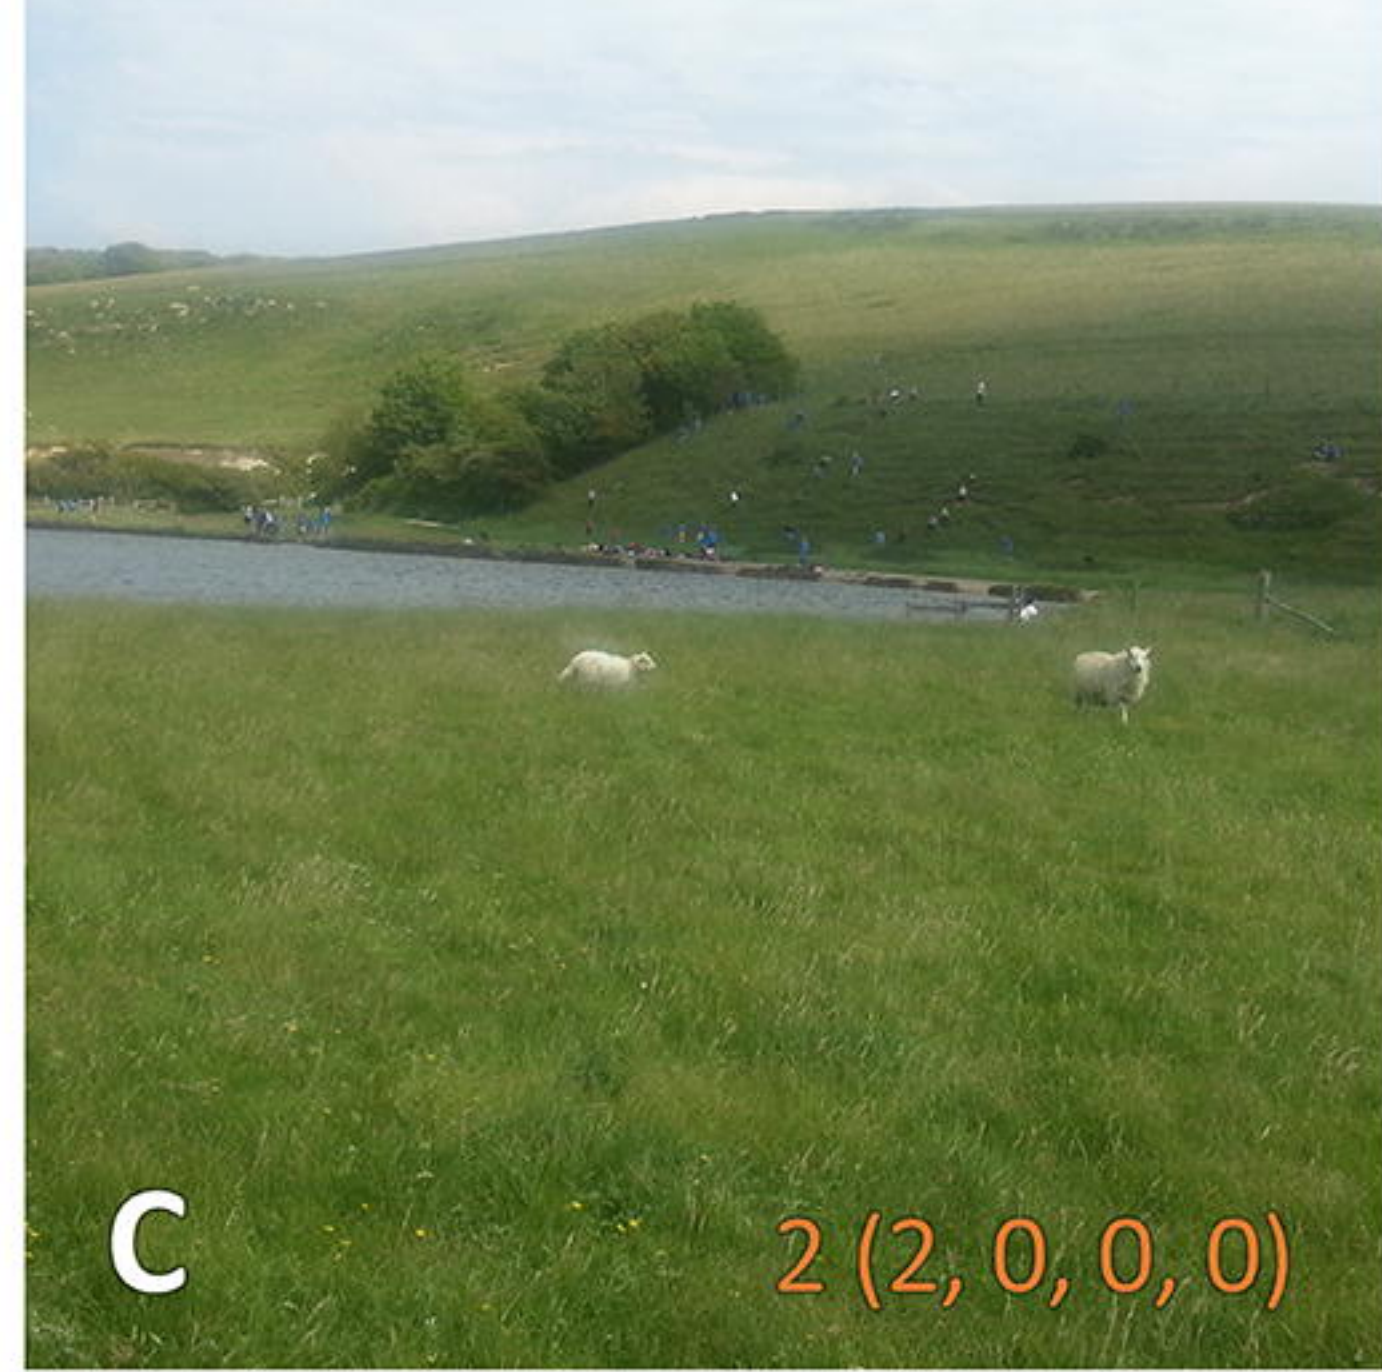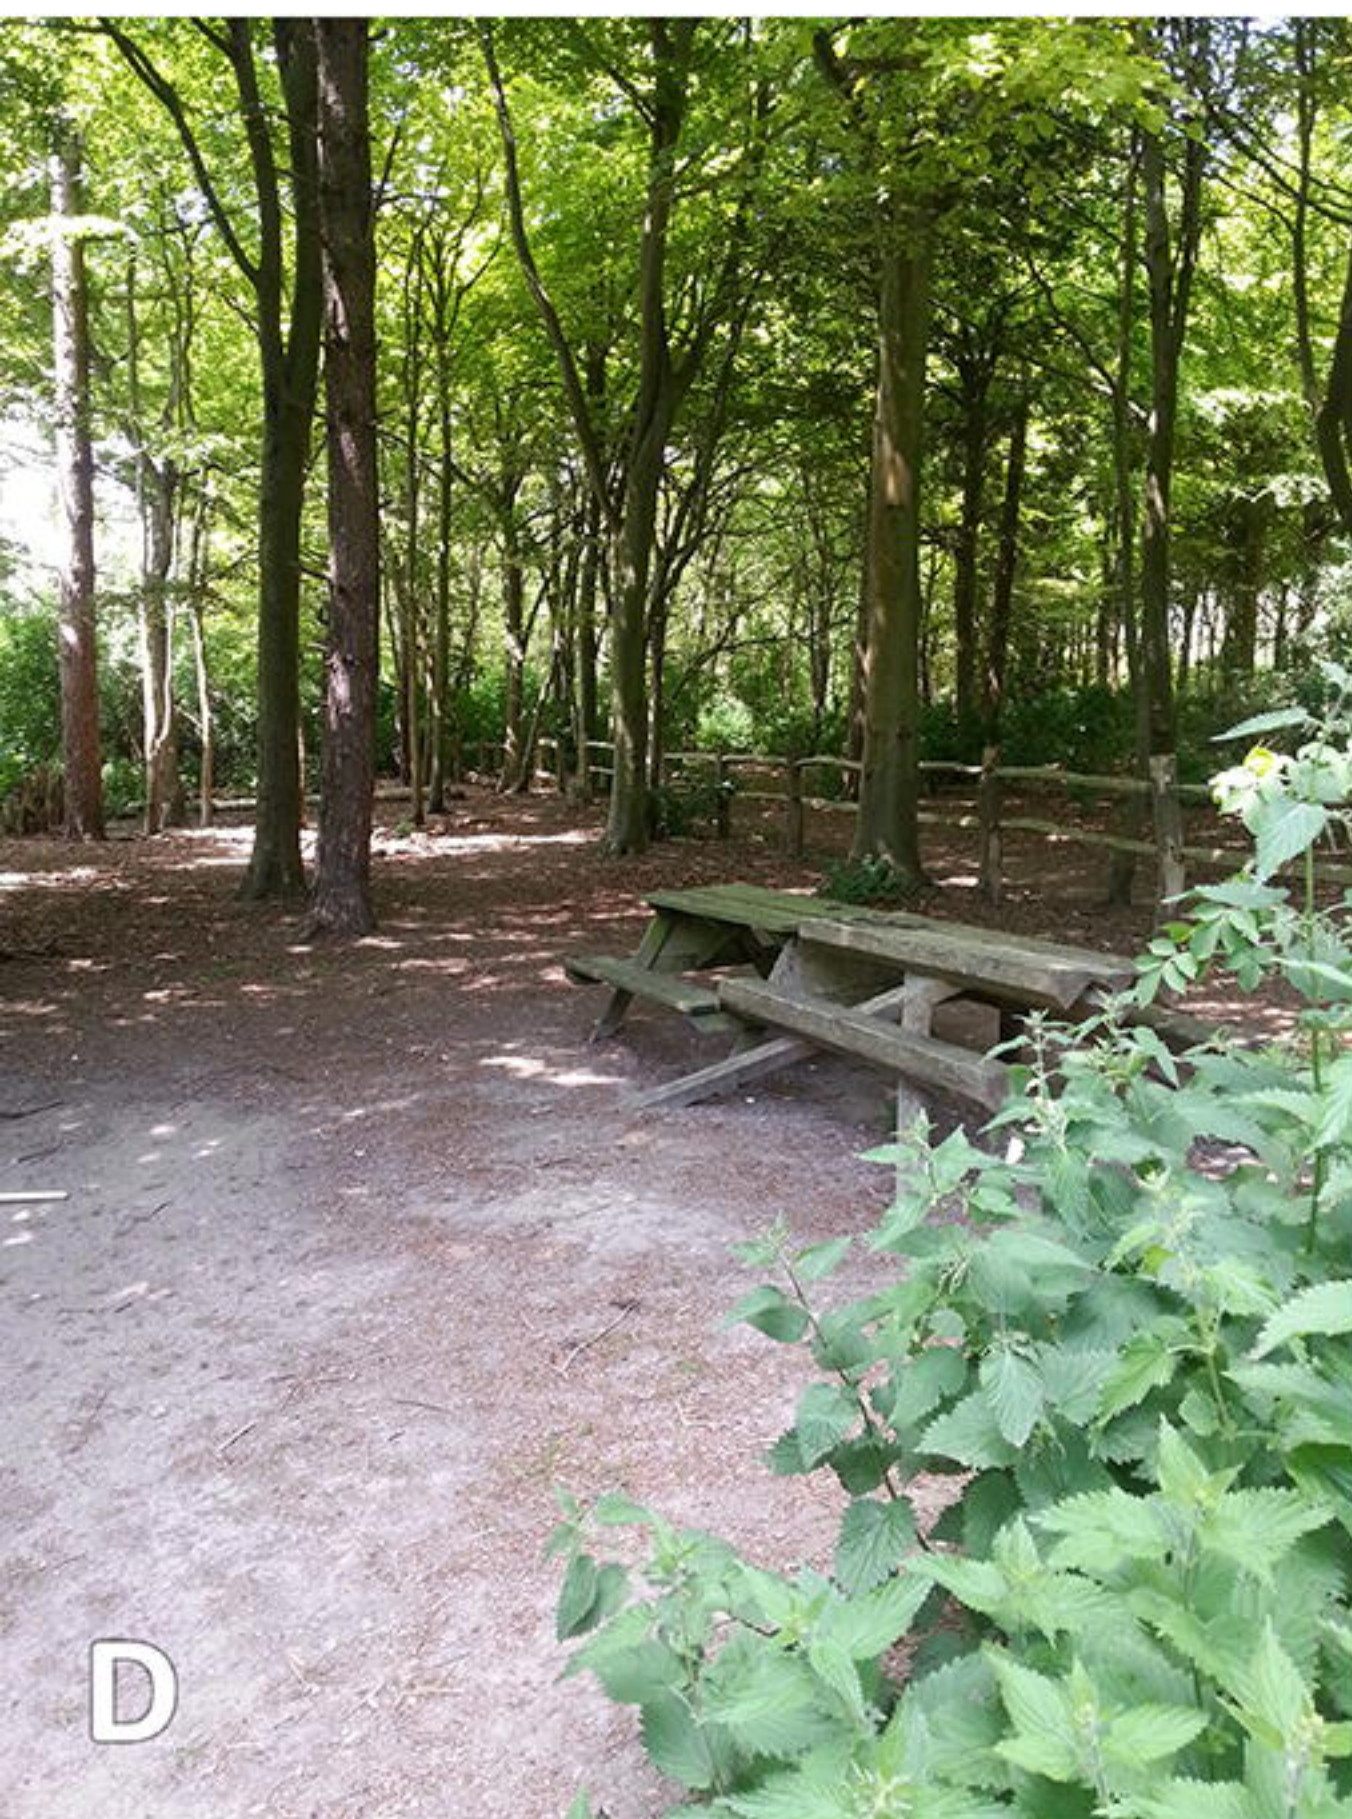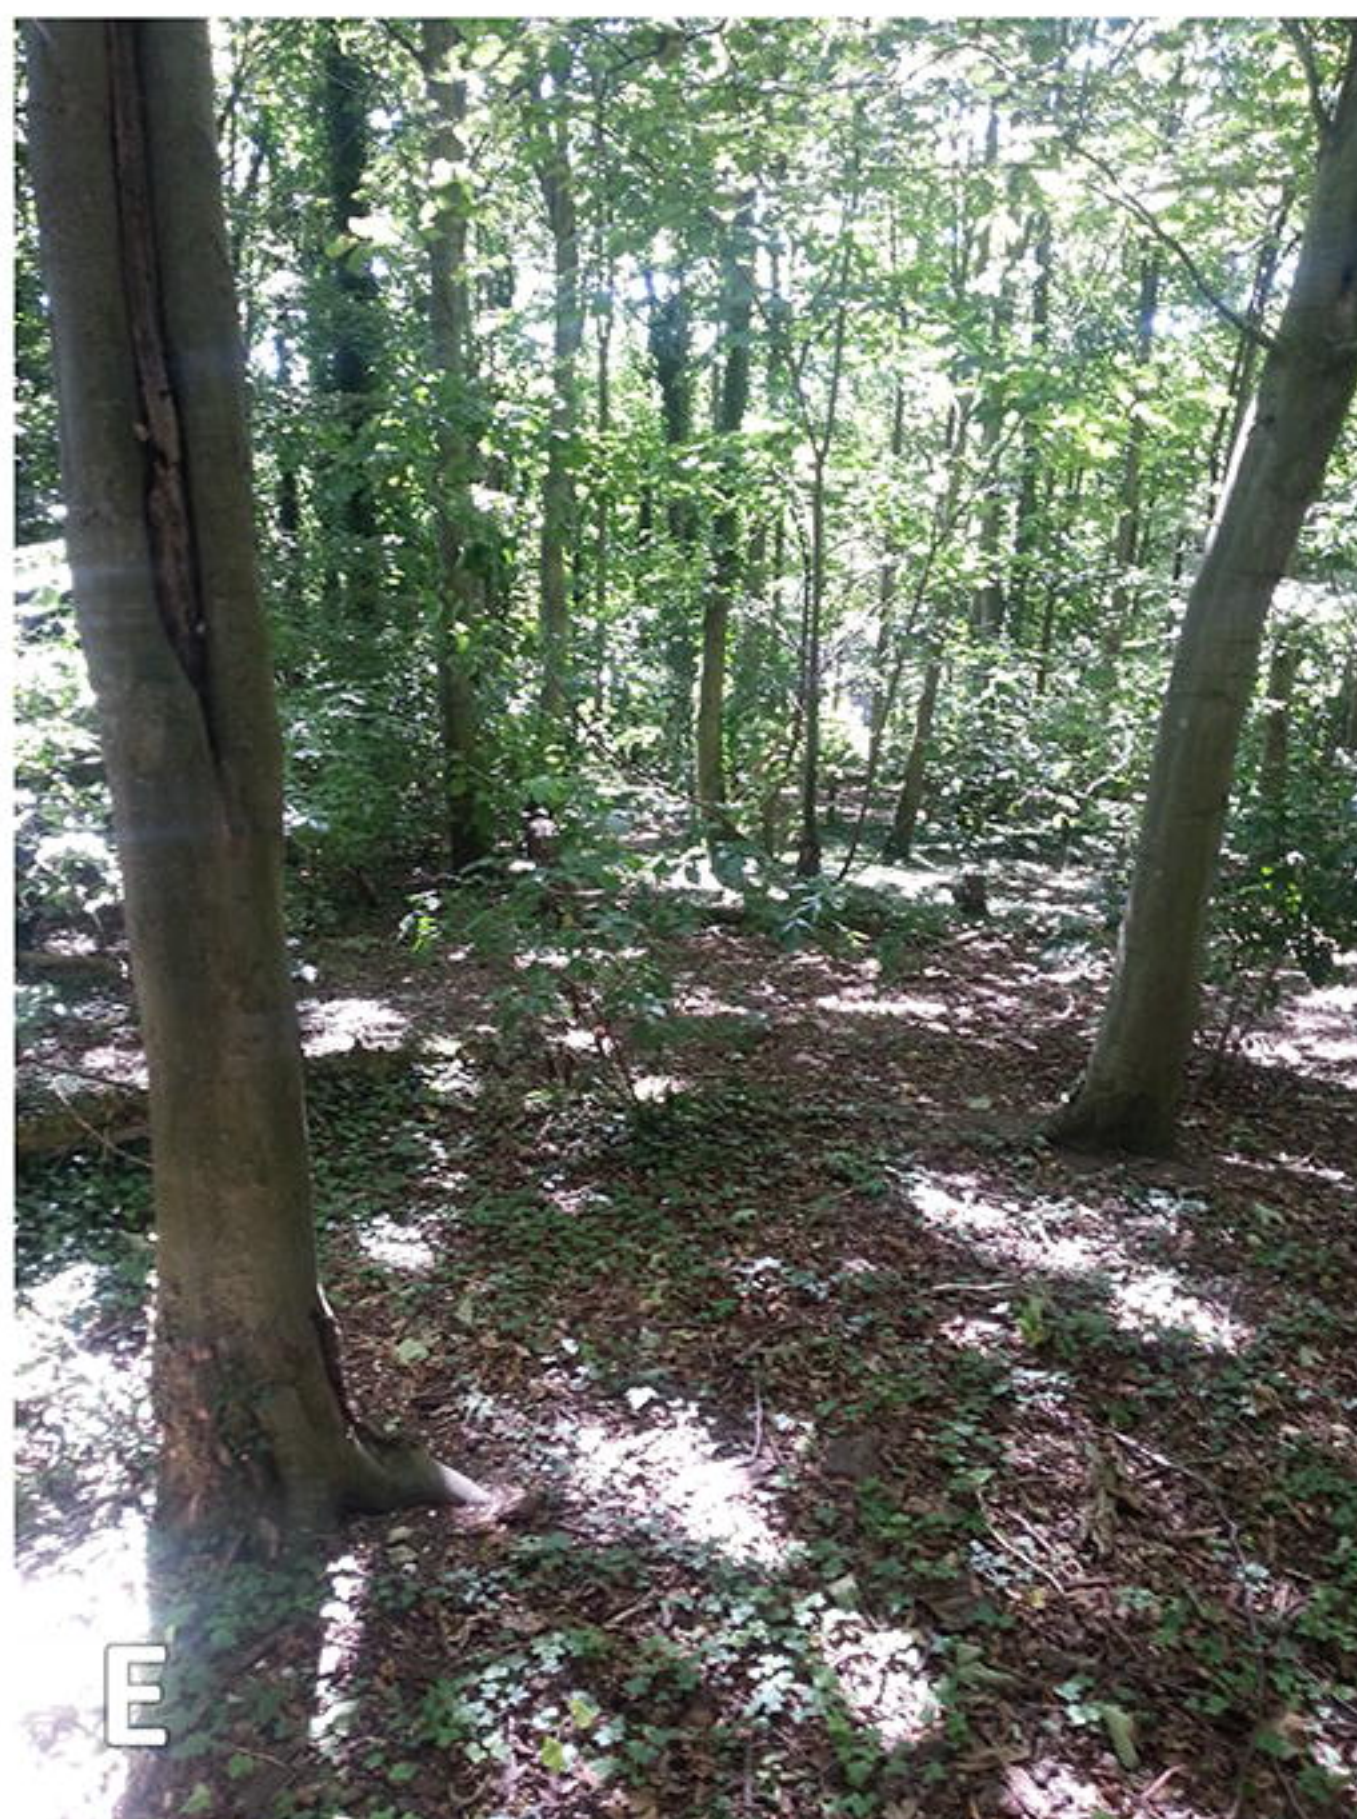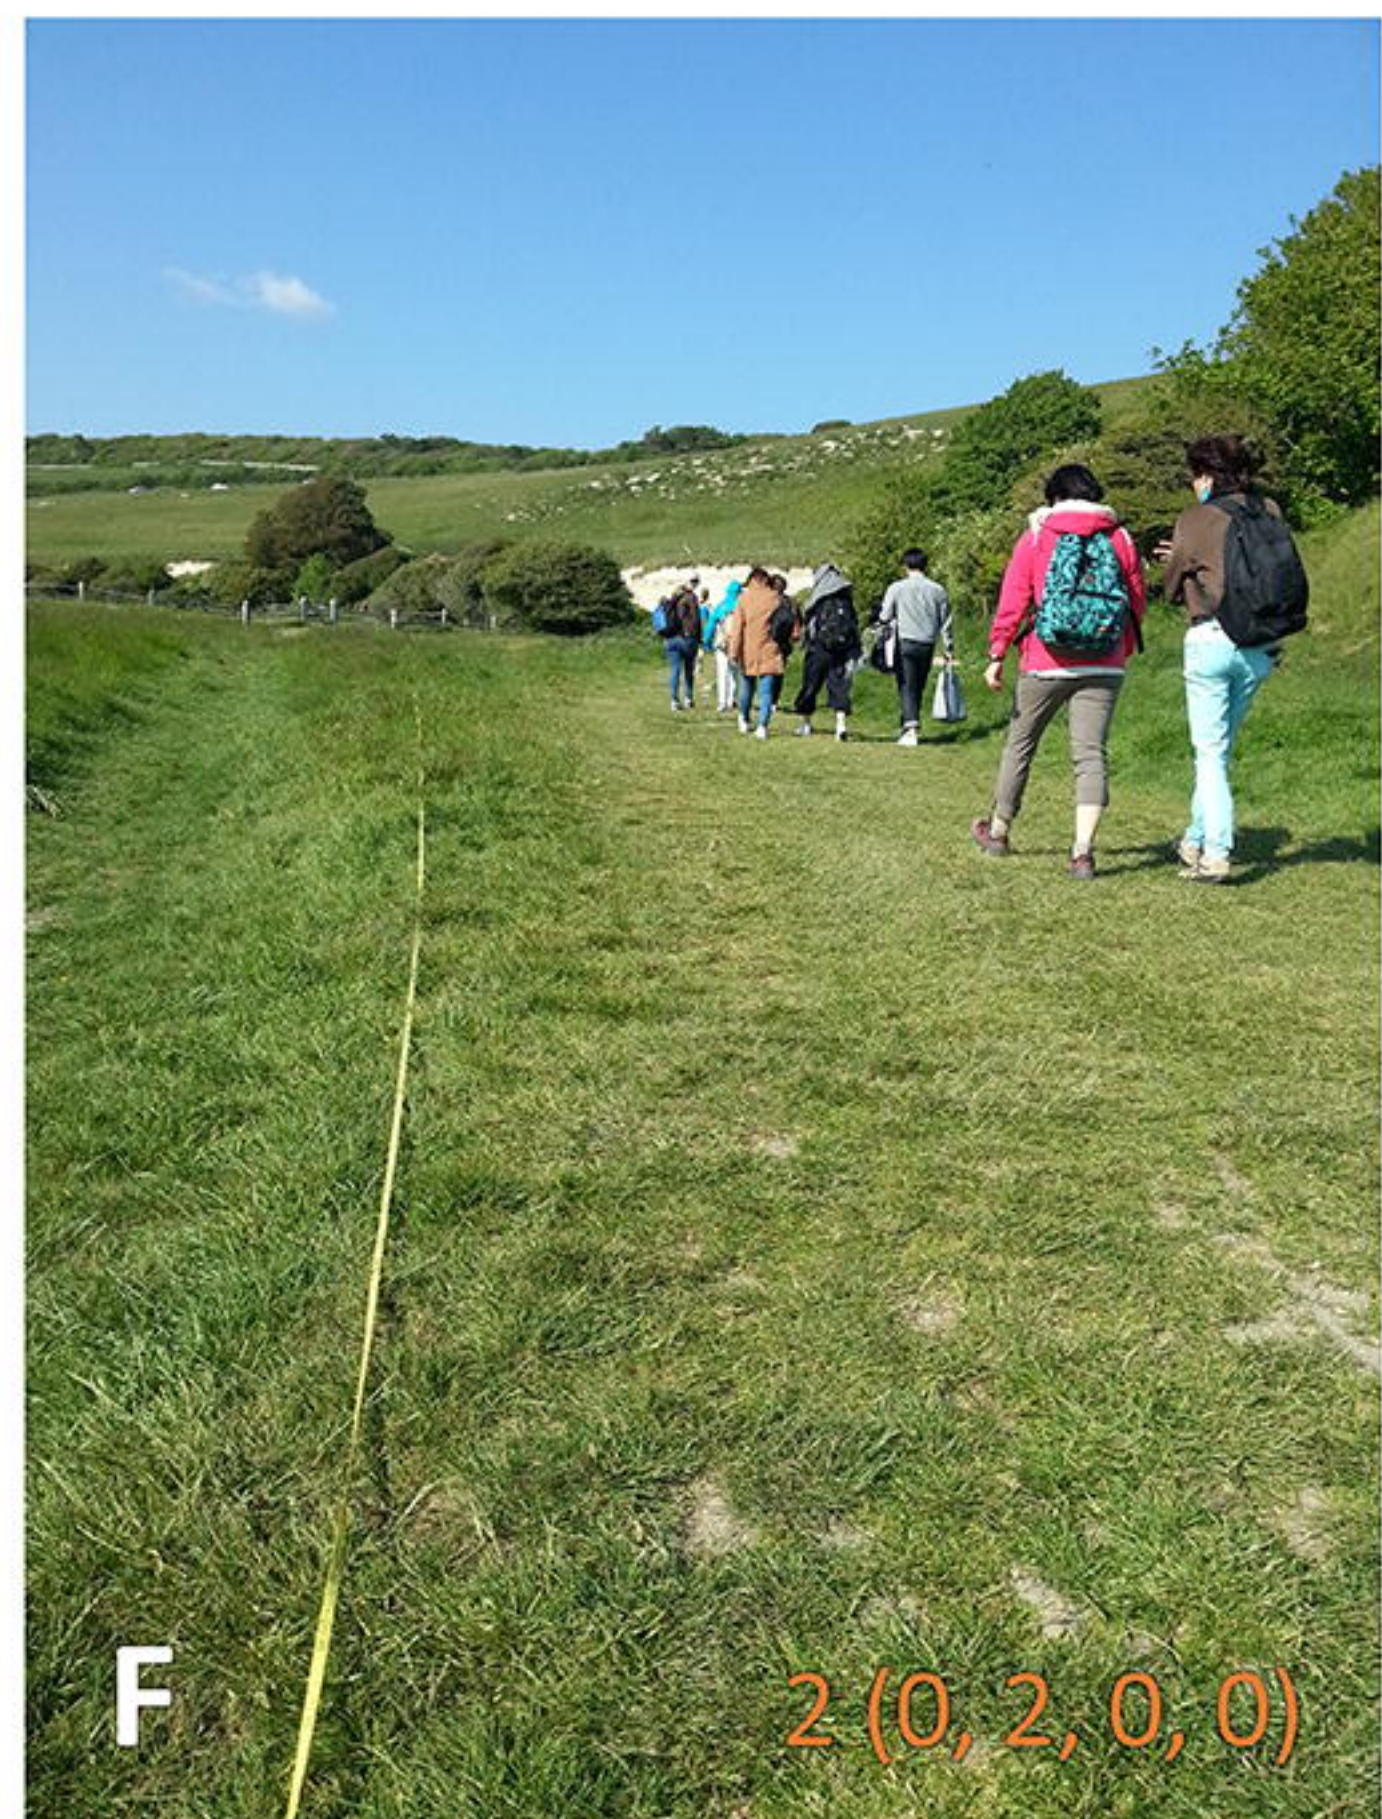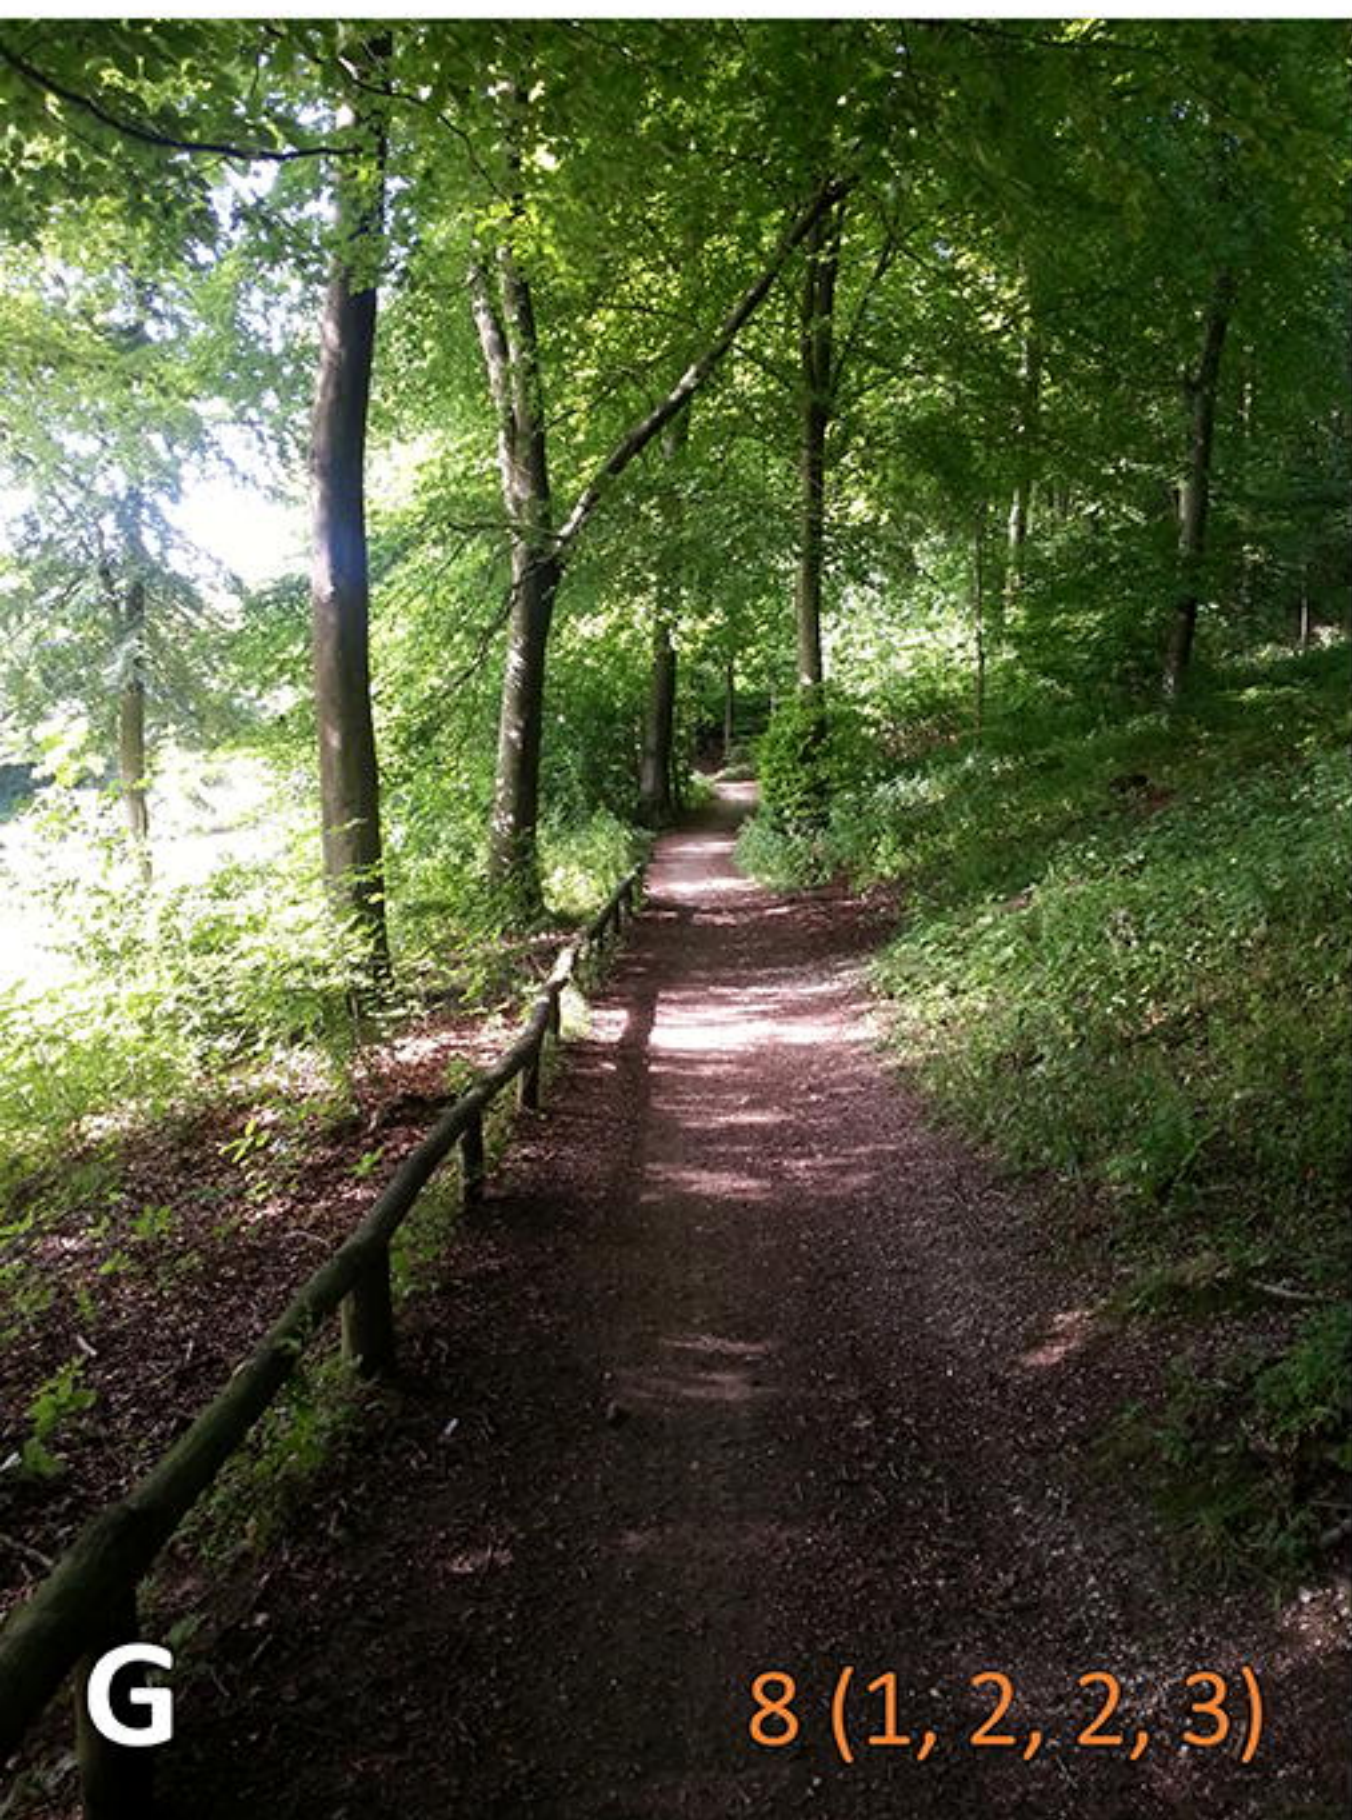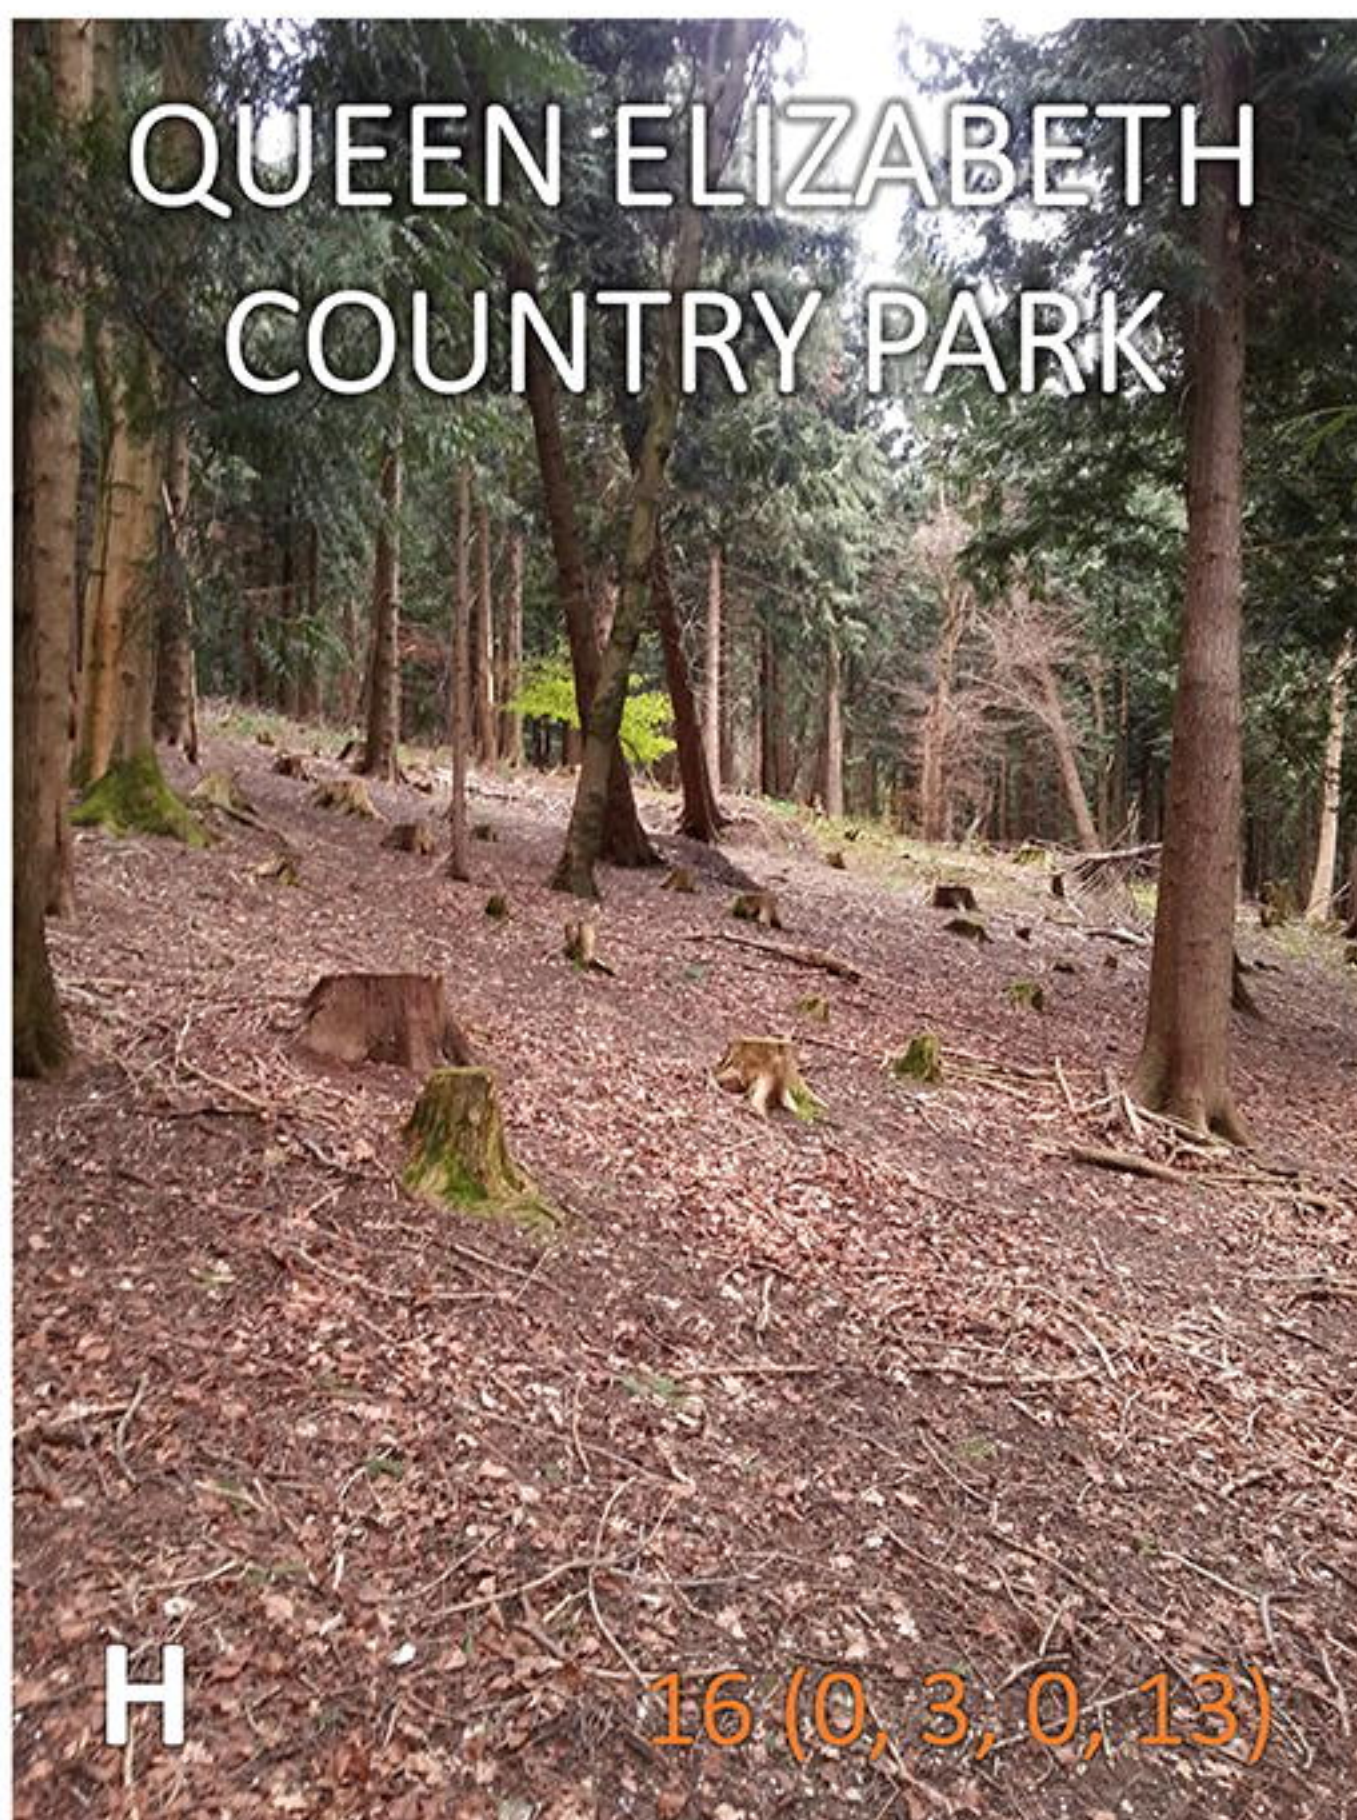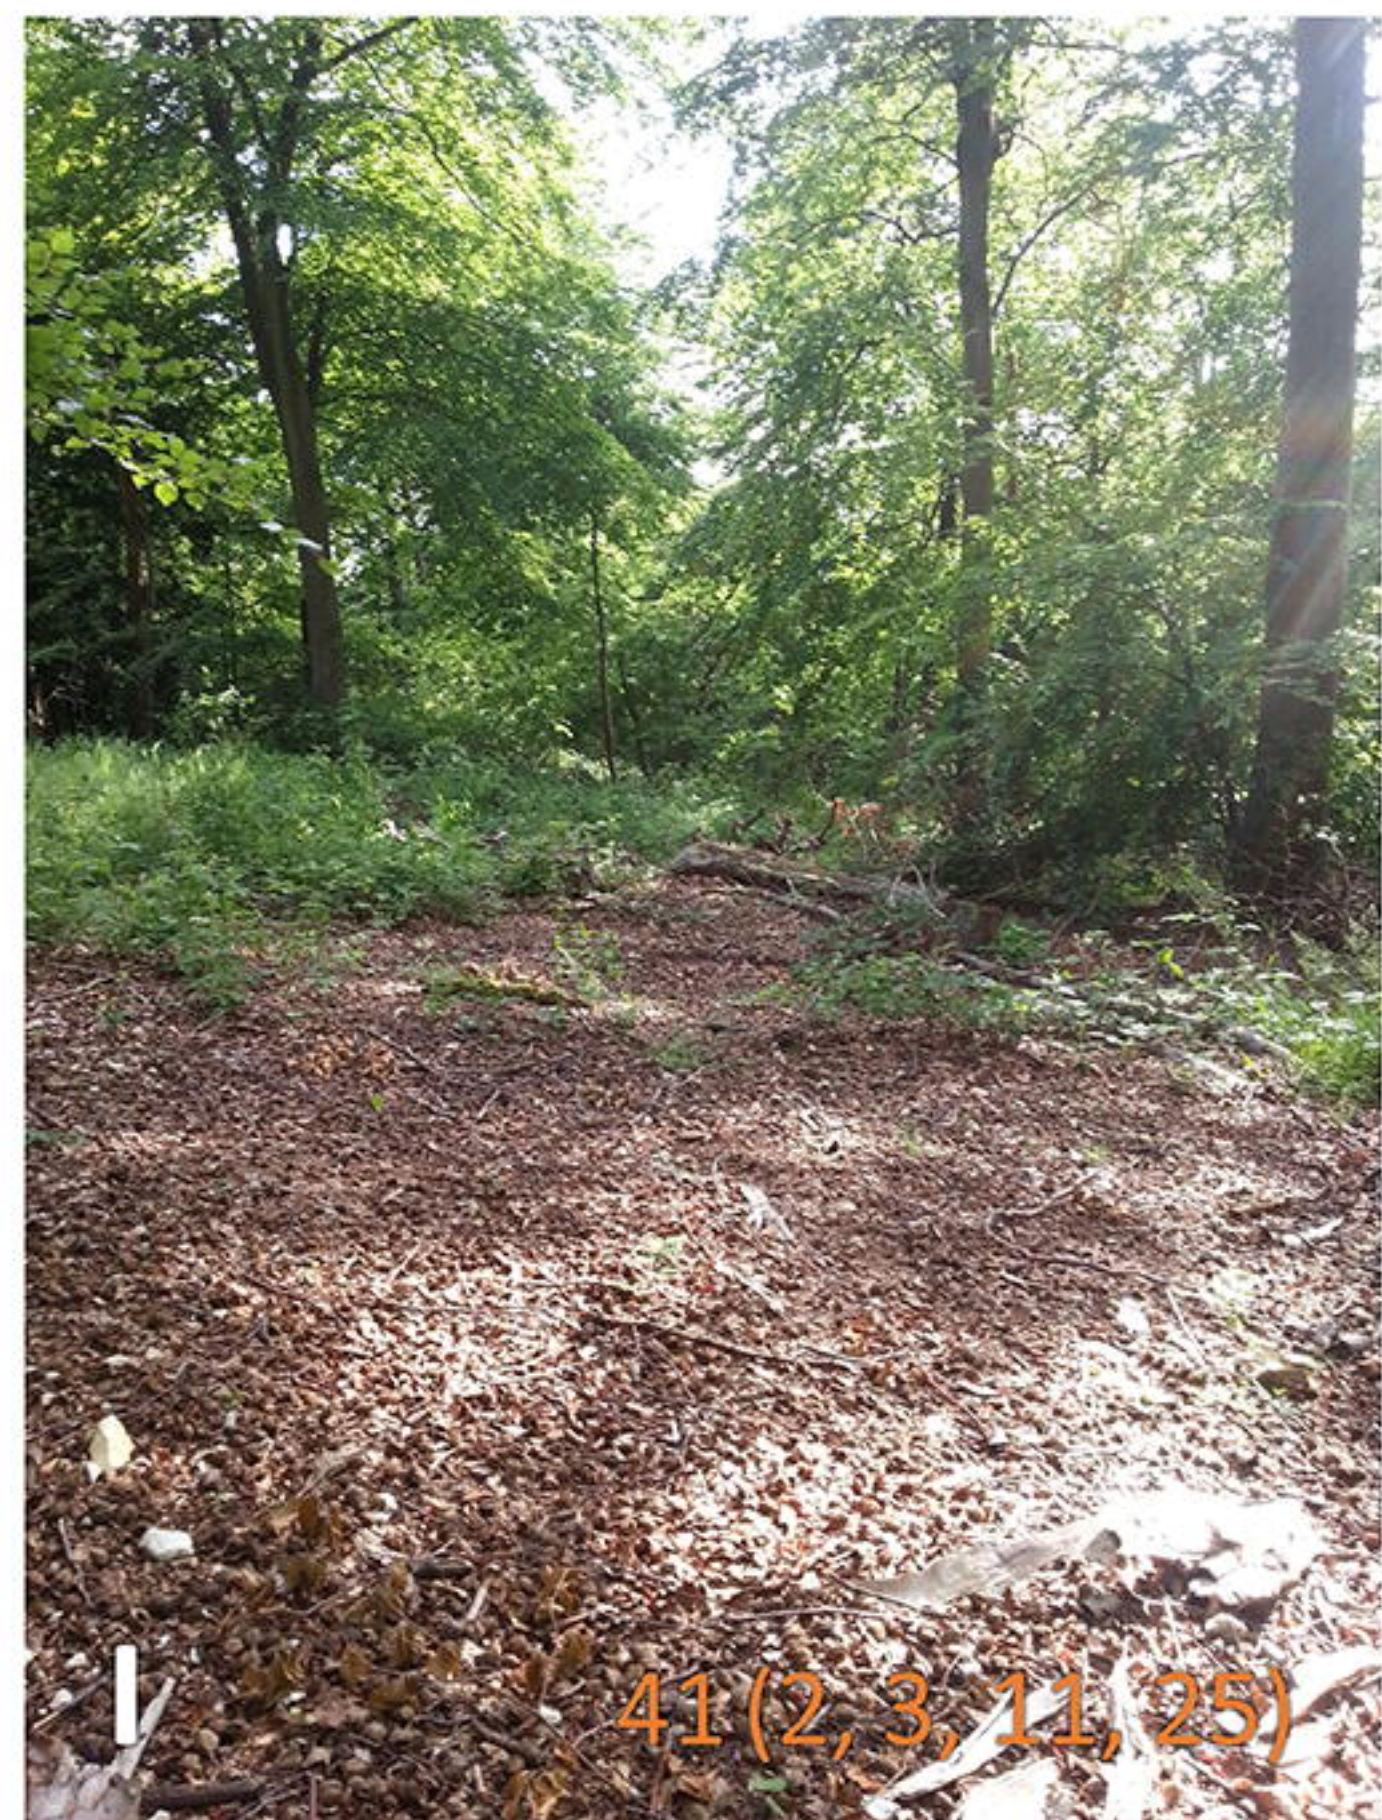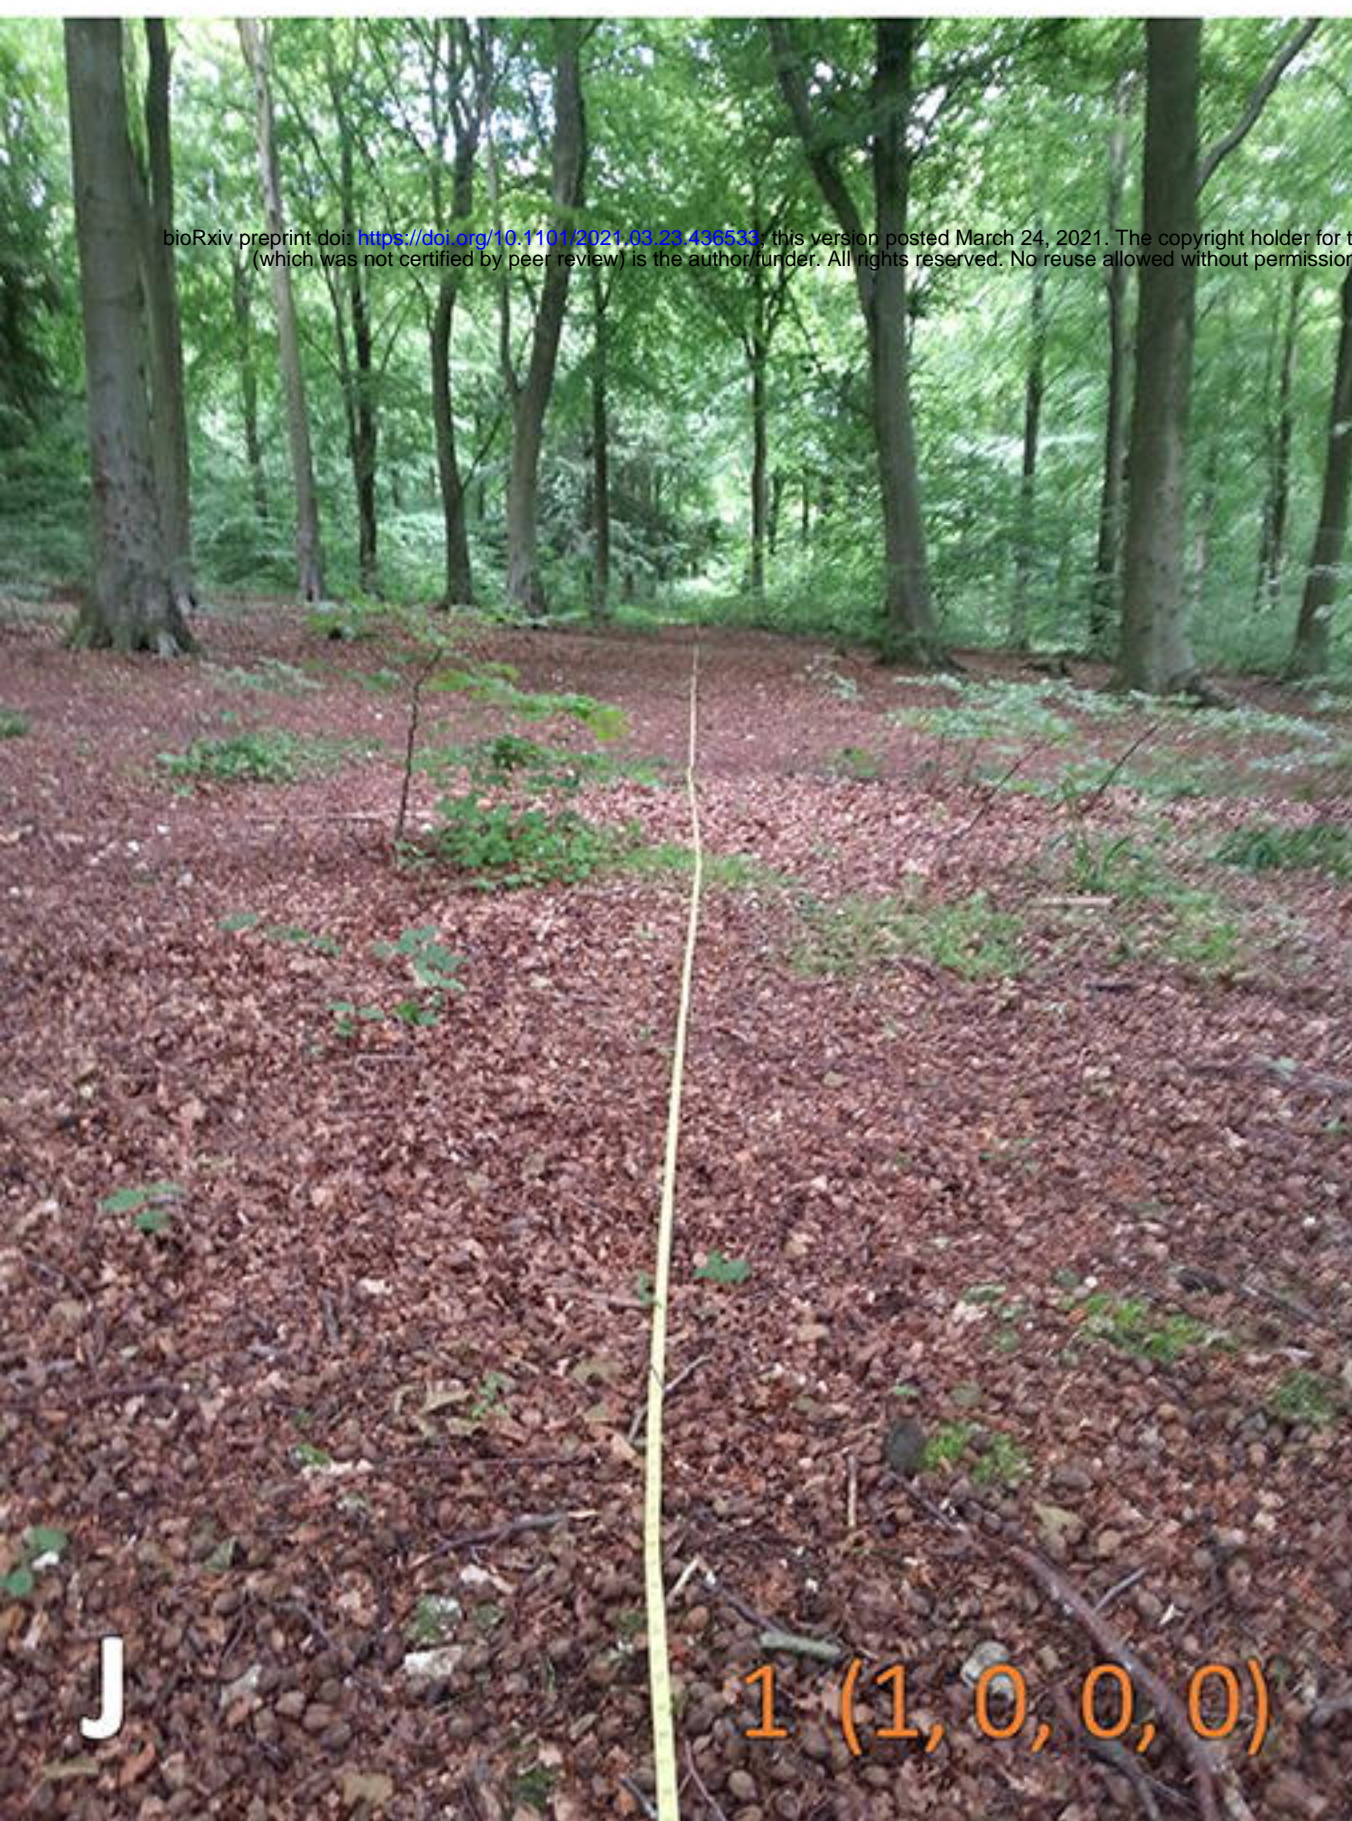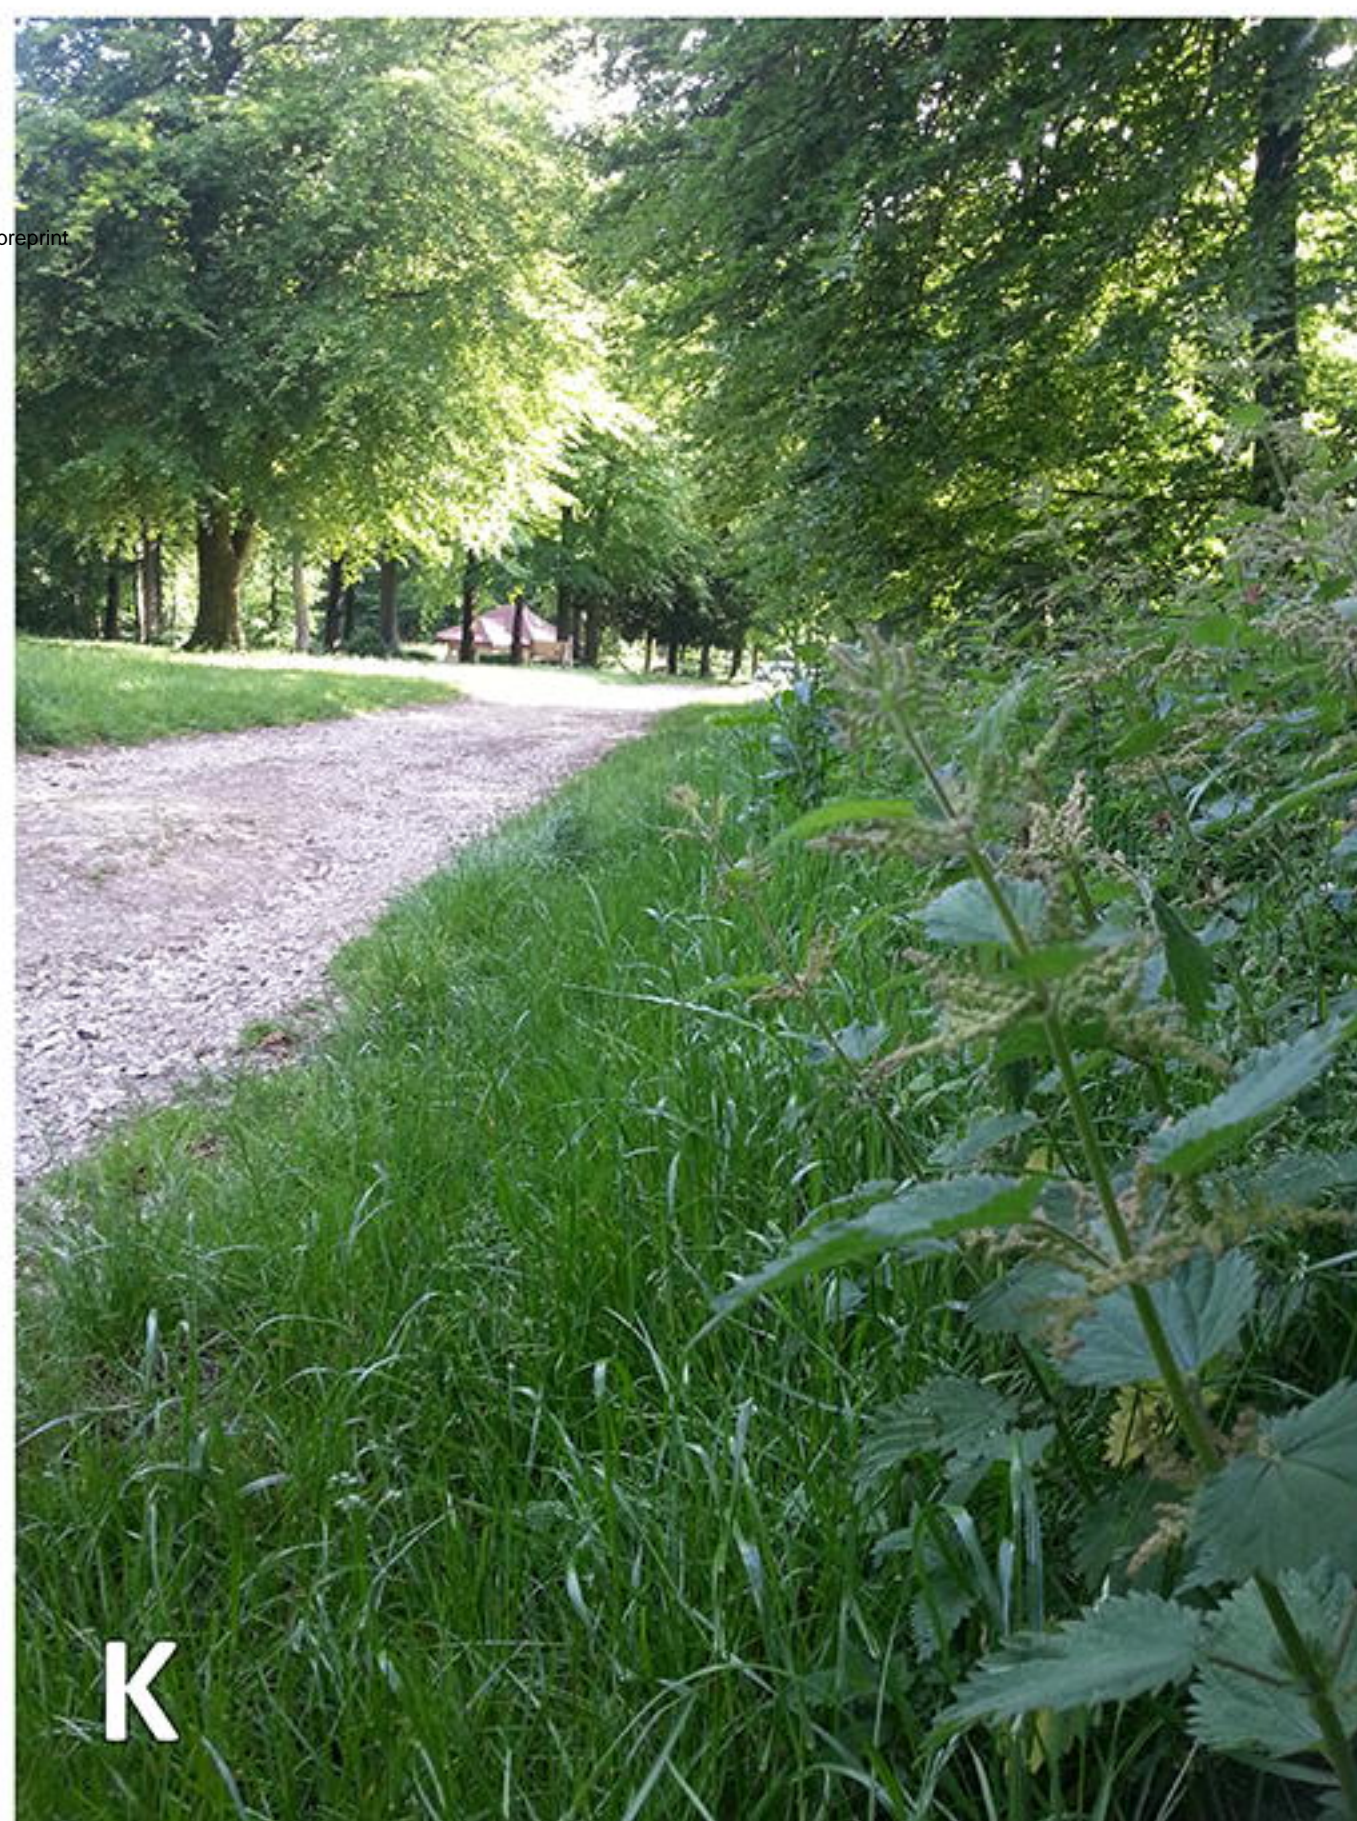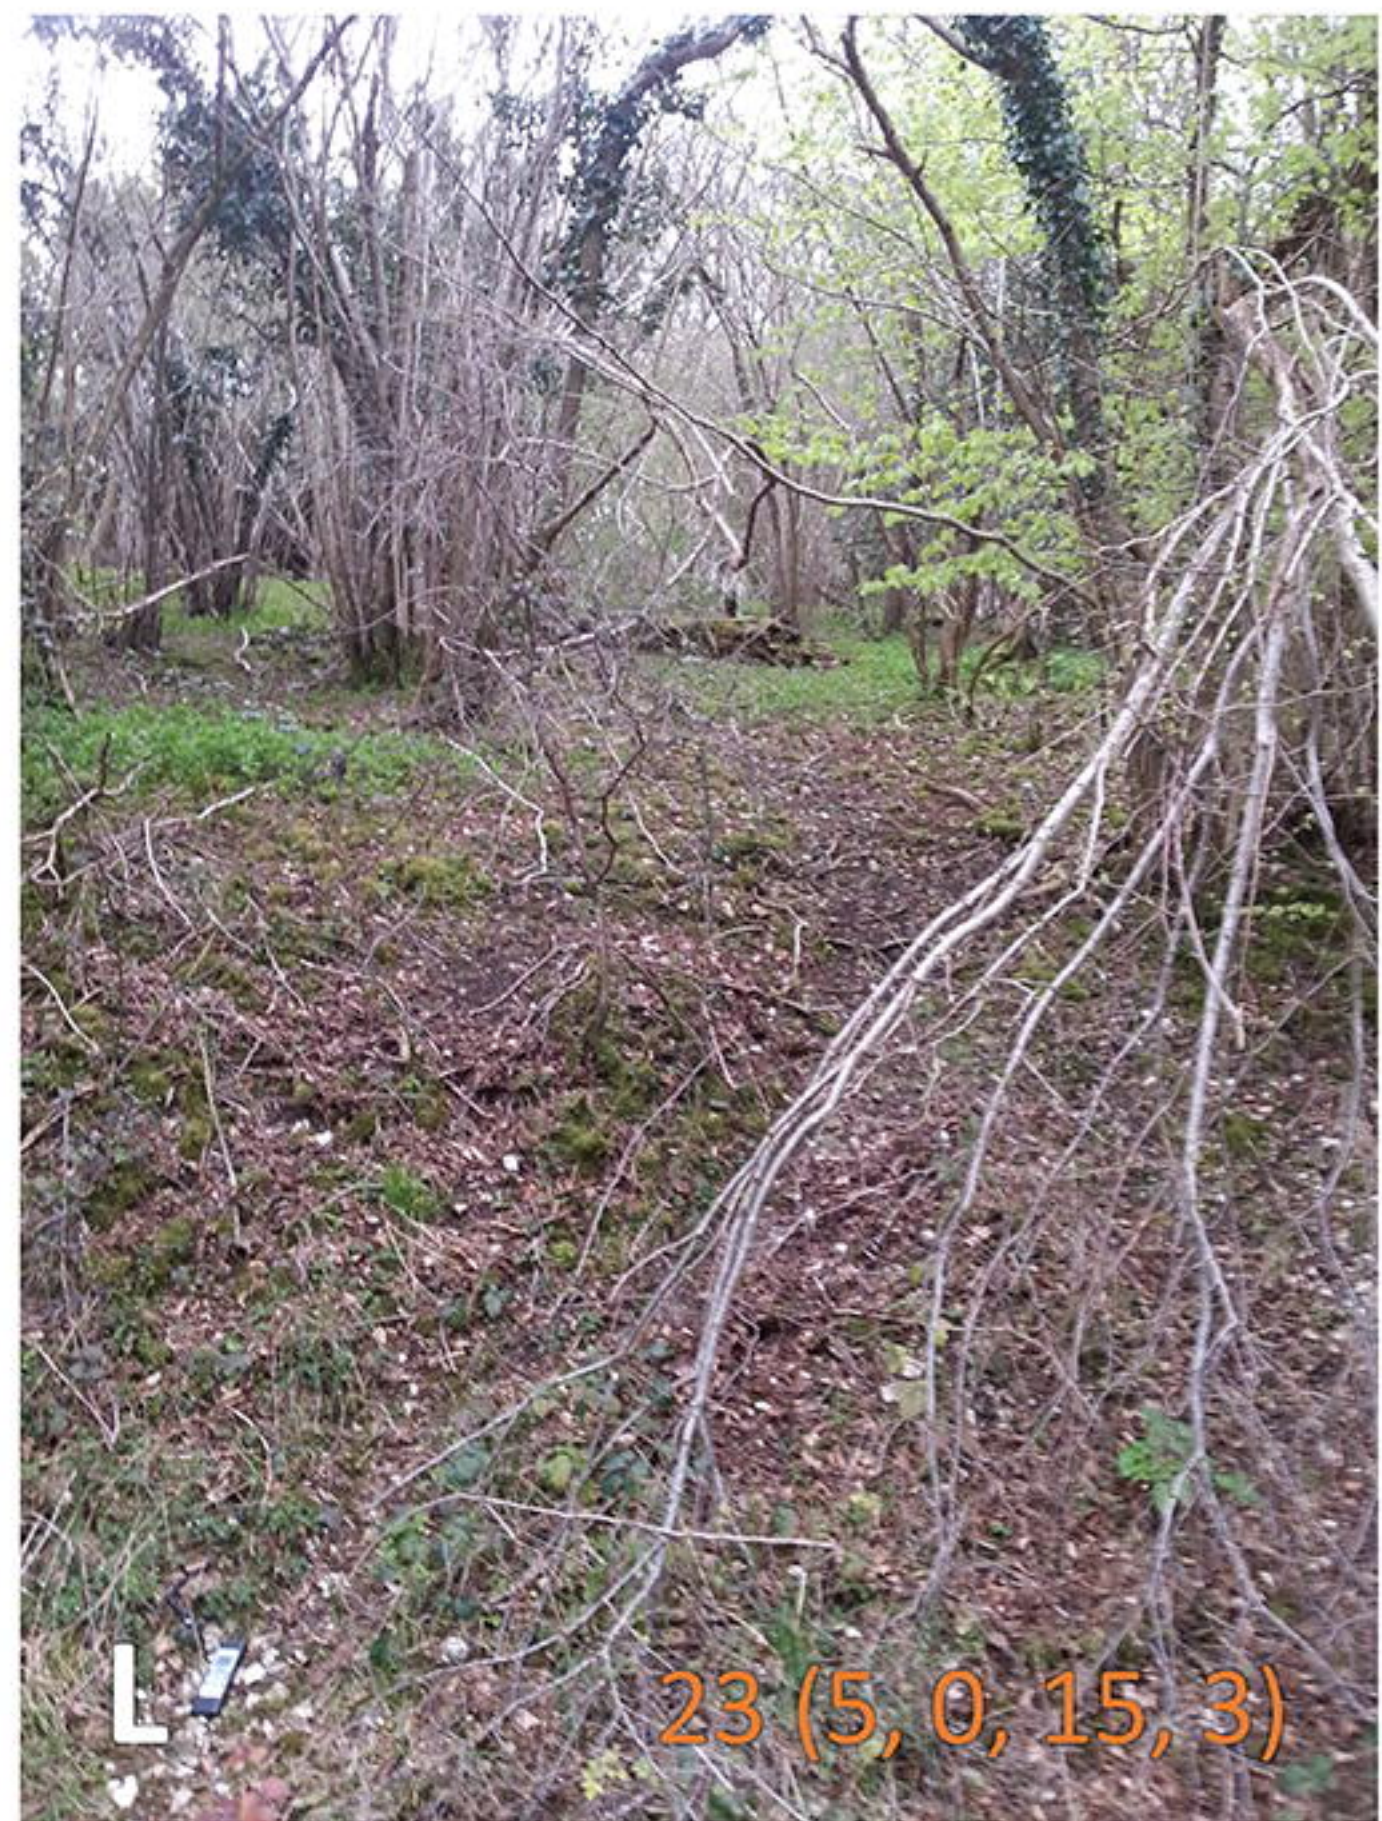

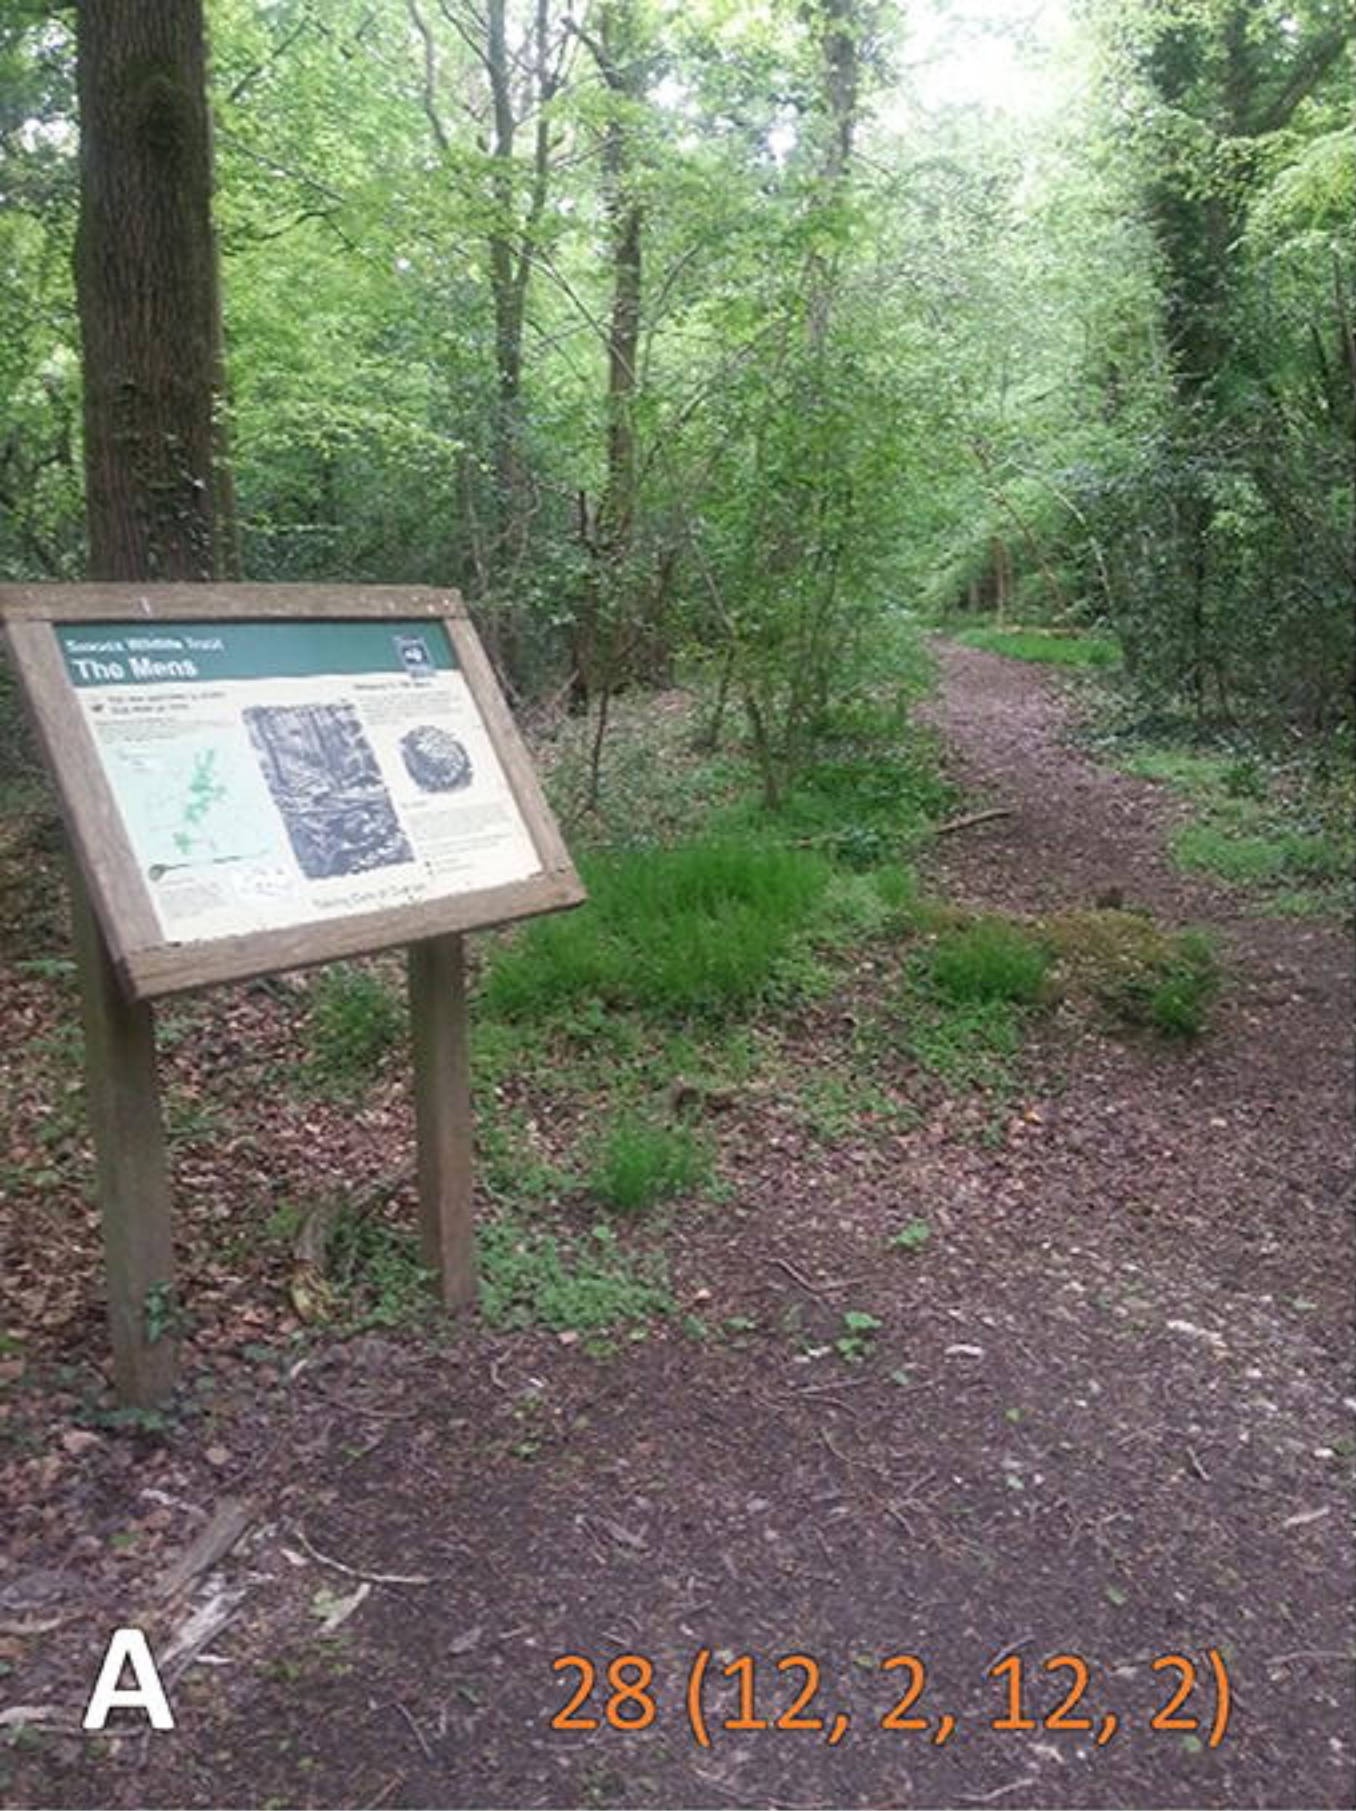

**A** 28 (12, 2, 12, 2)

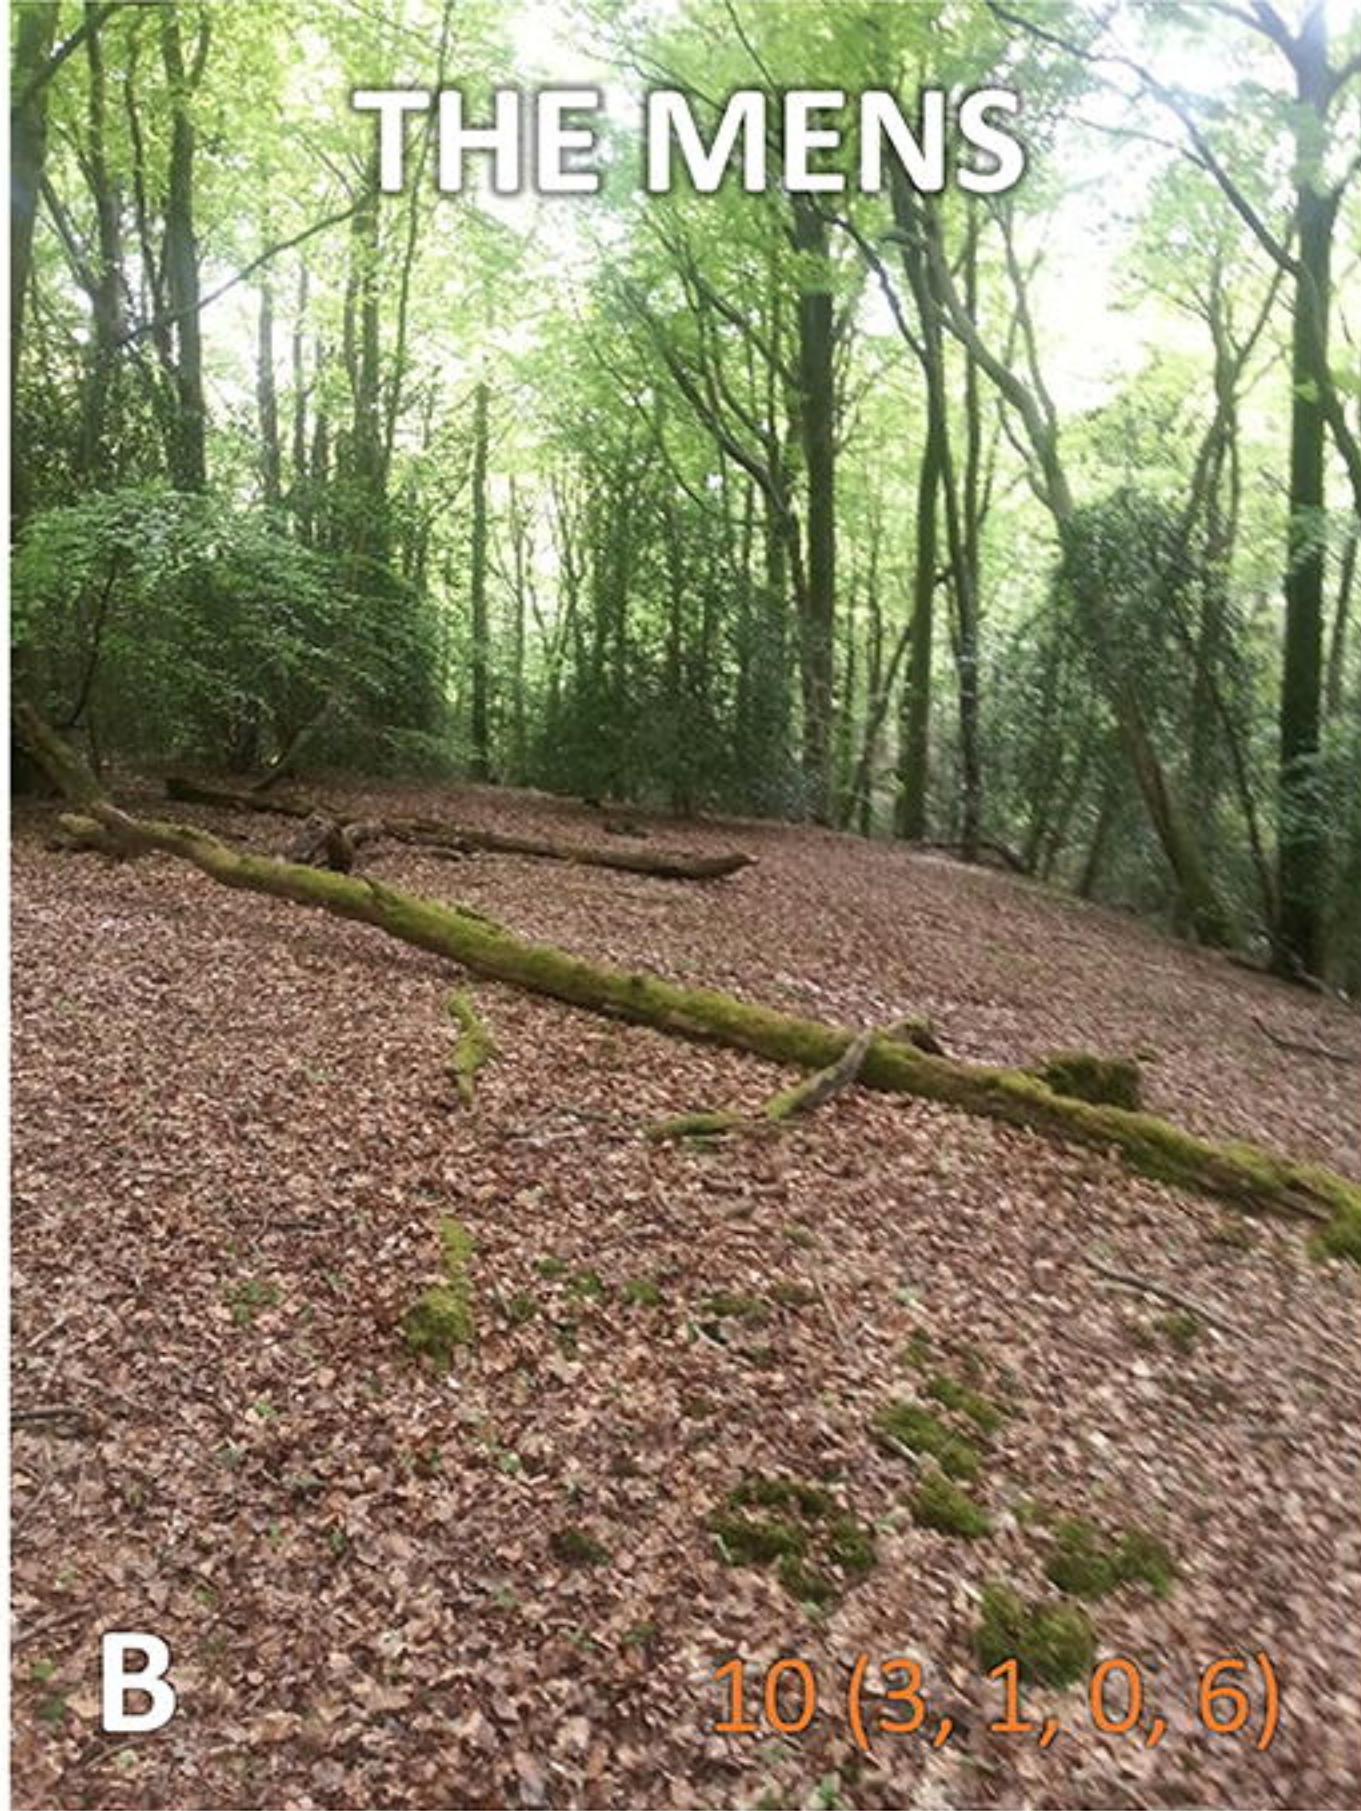

**B** 10 (3, 1, 0, 6)

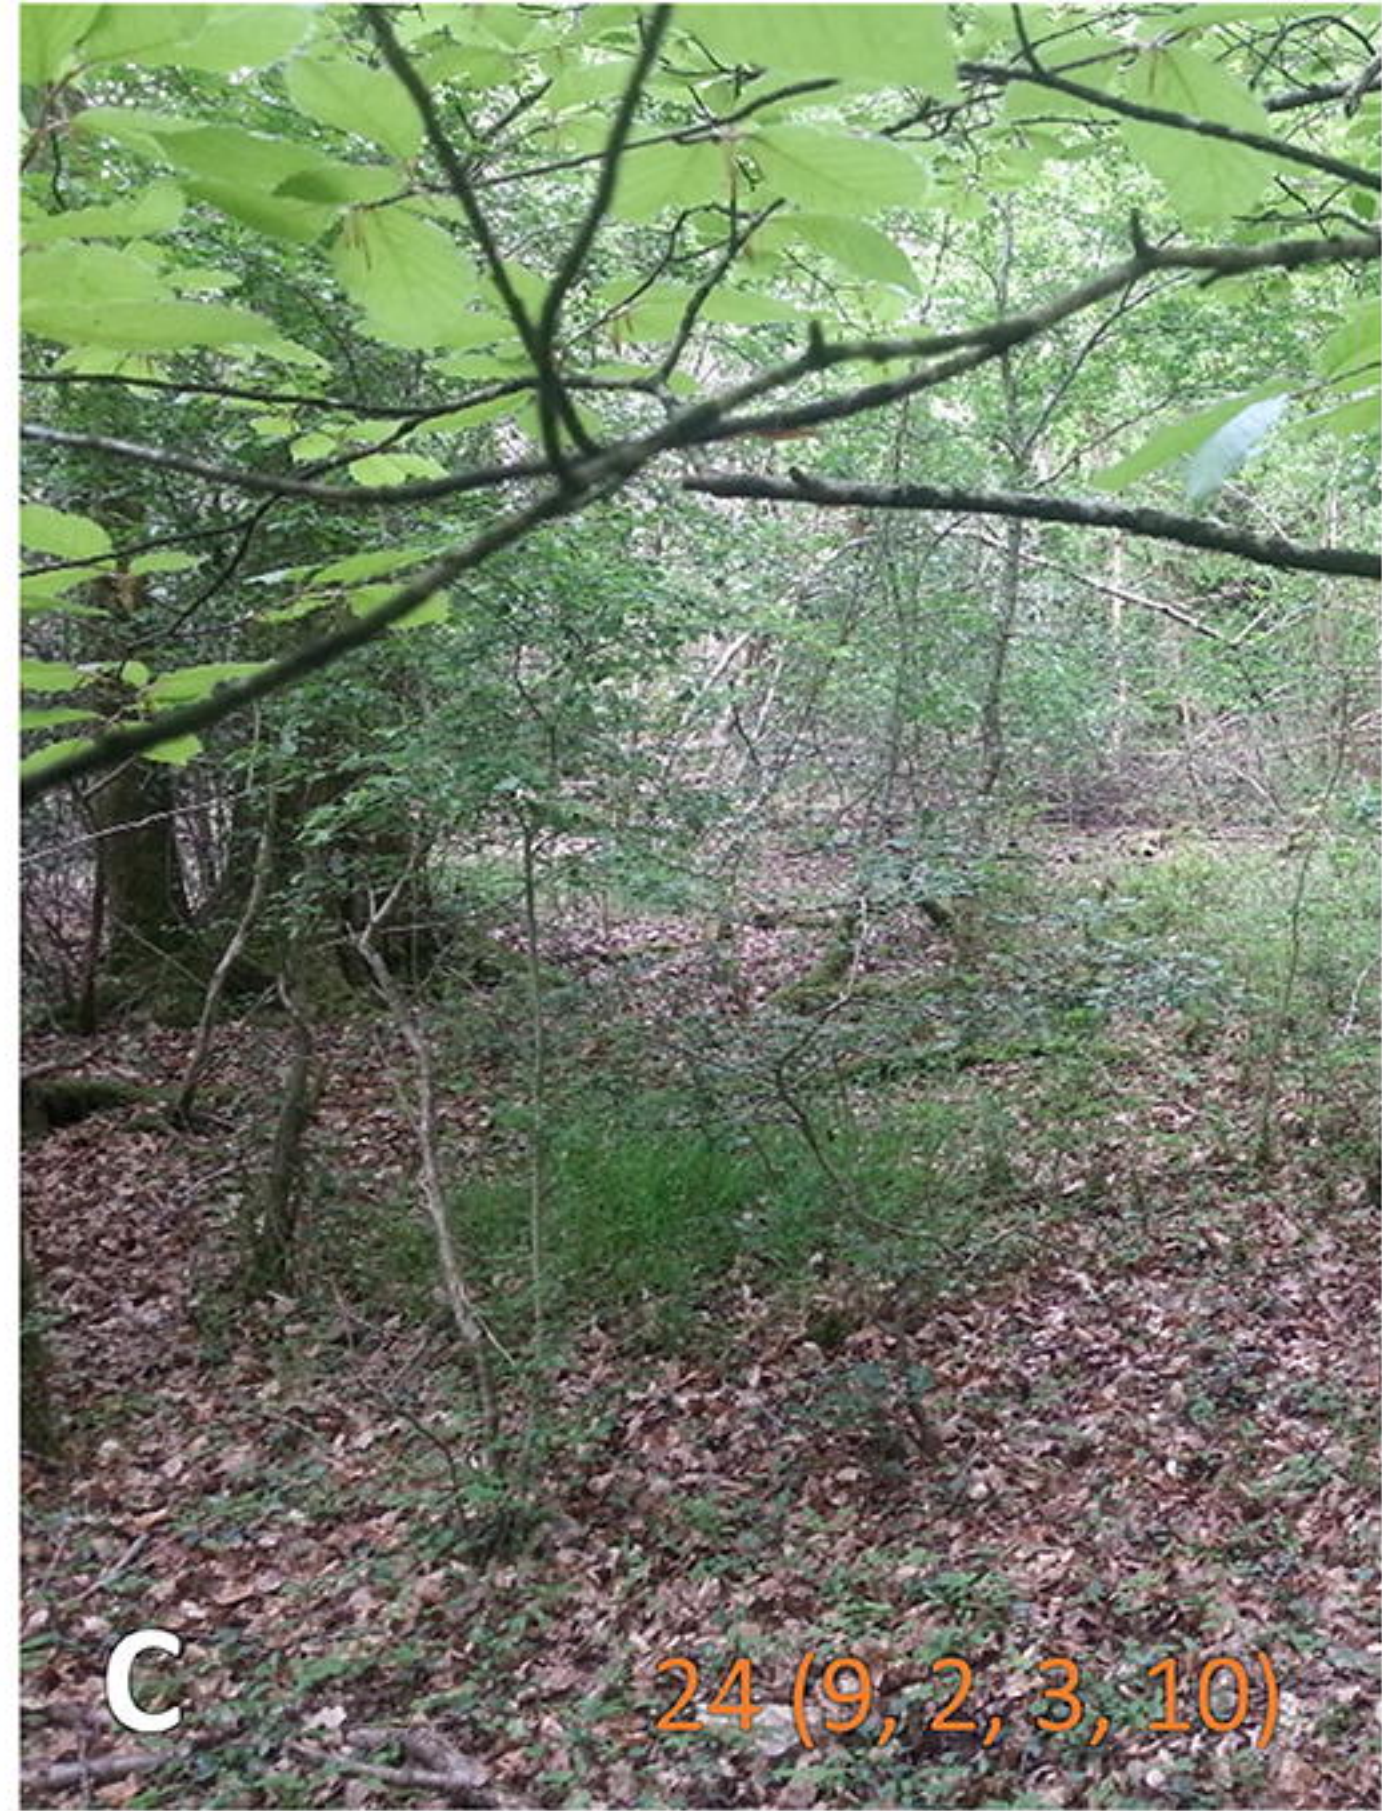

**C** 24 (9, 2, 3, 10)

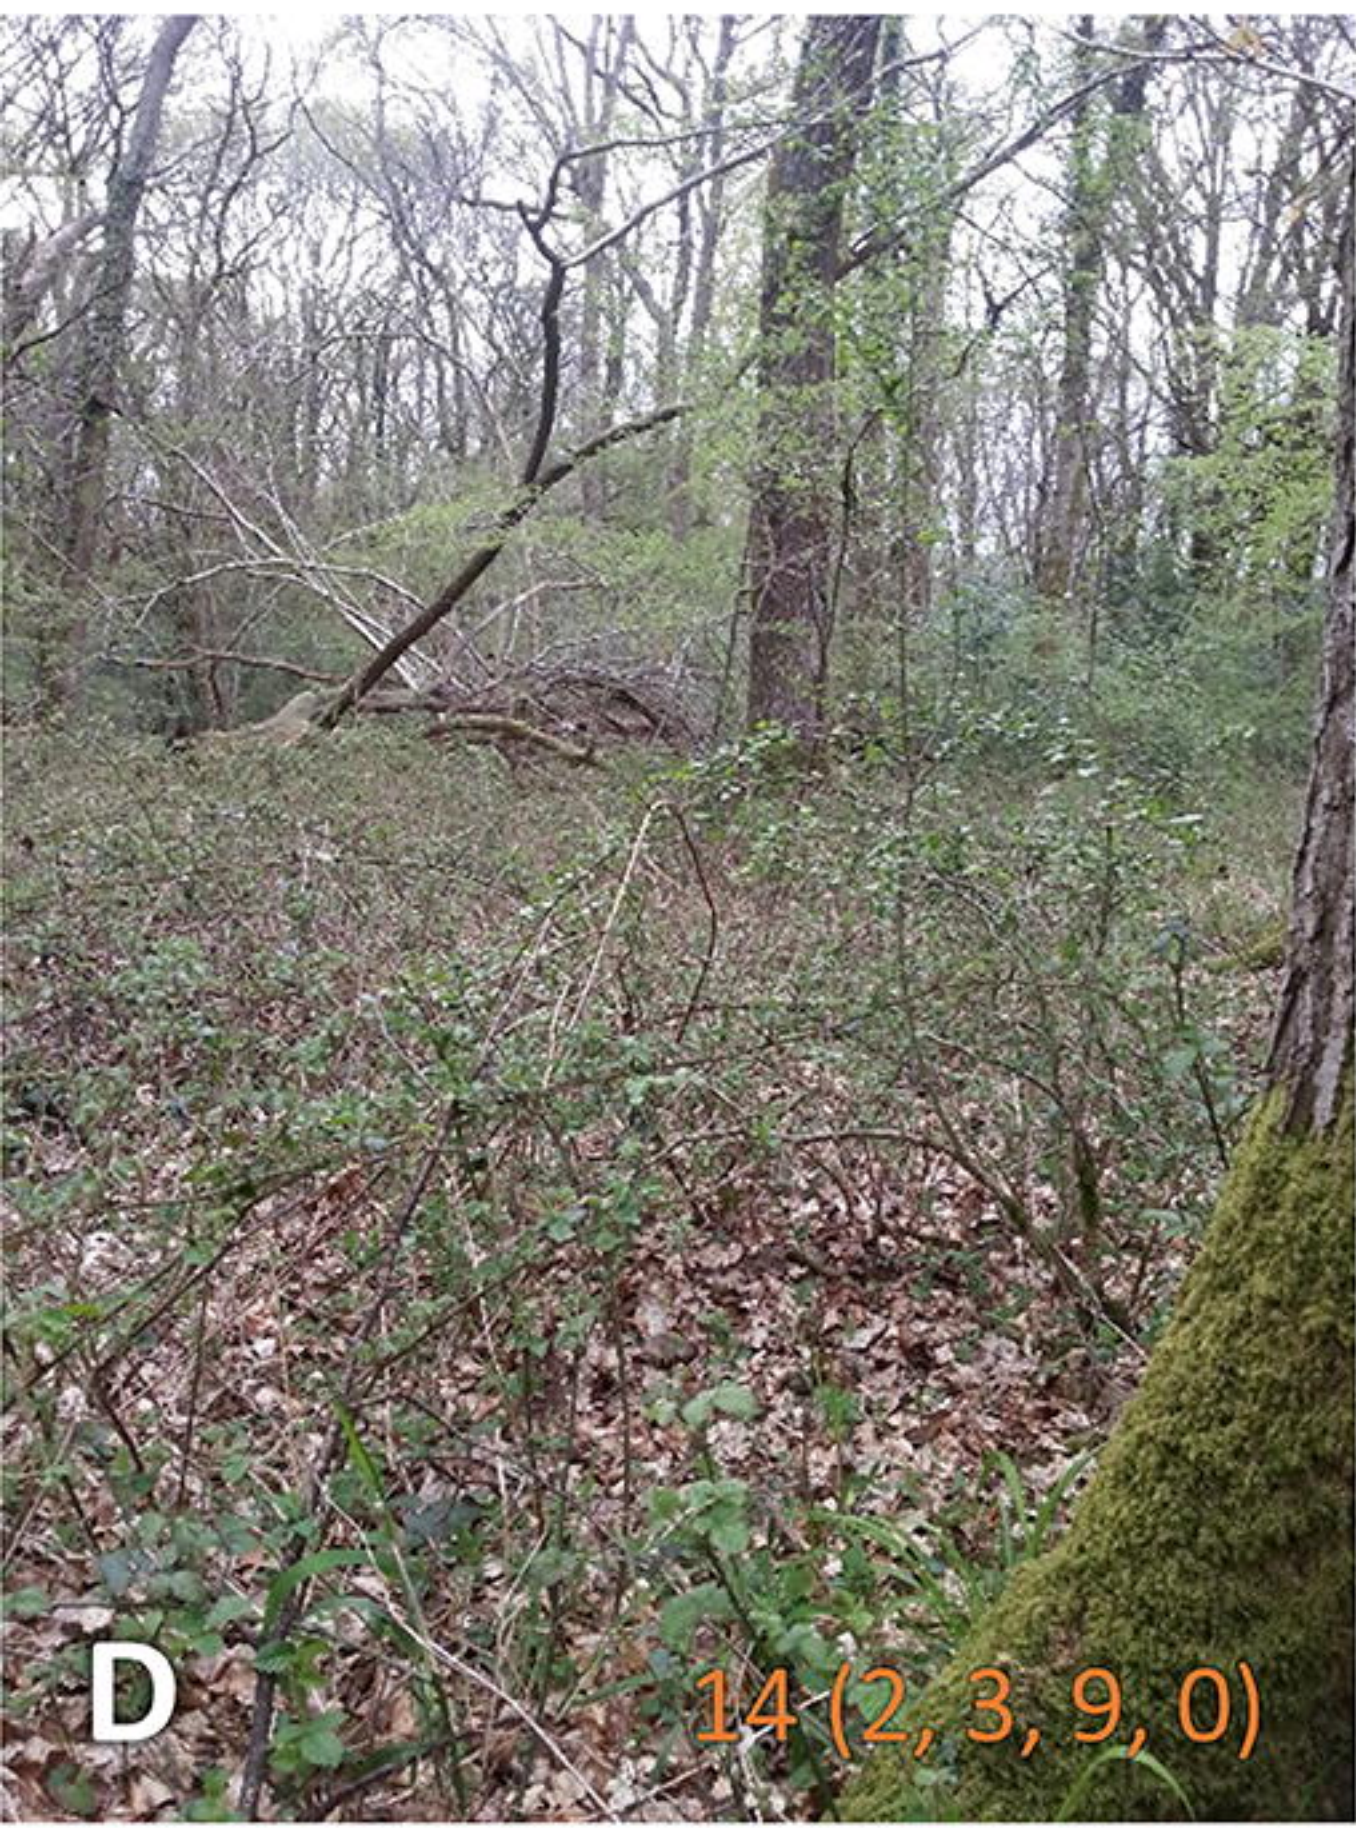

**D** 14 (2, 3, 9, 0)

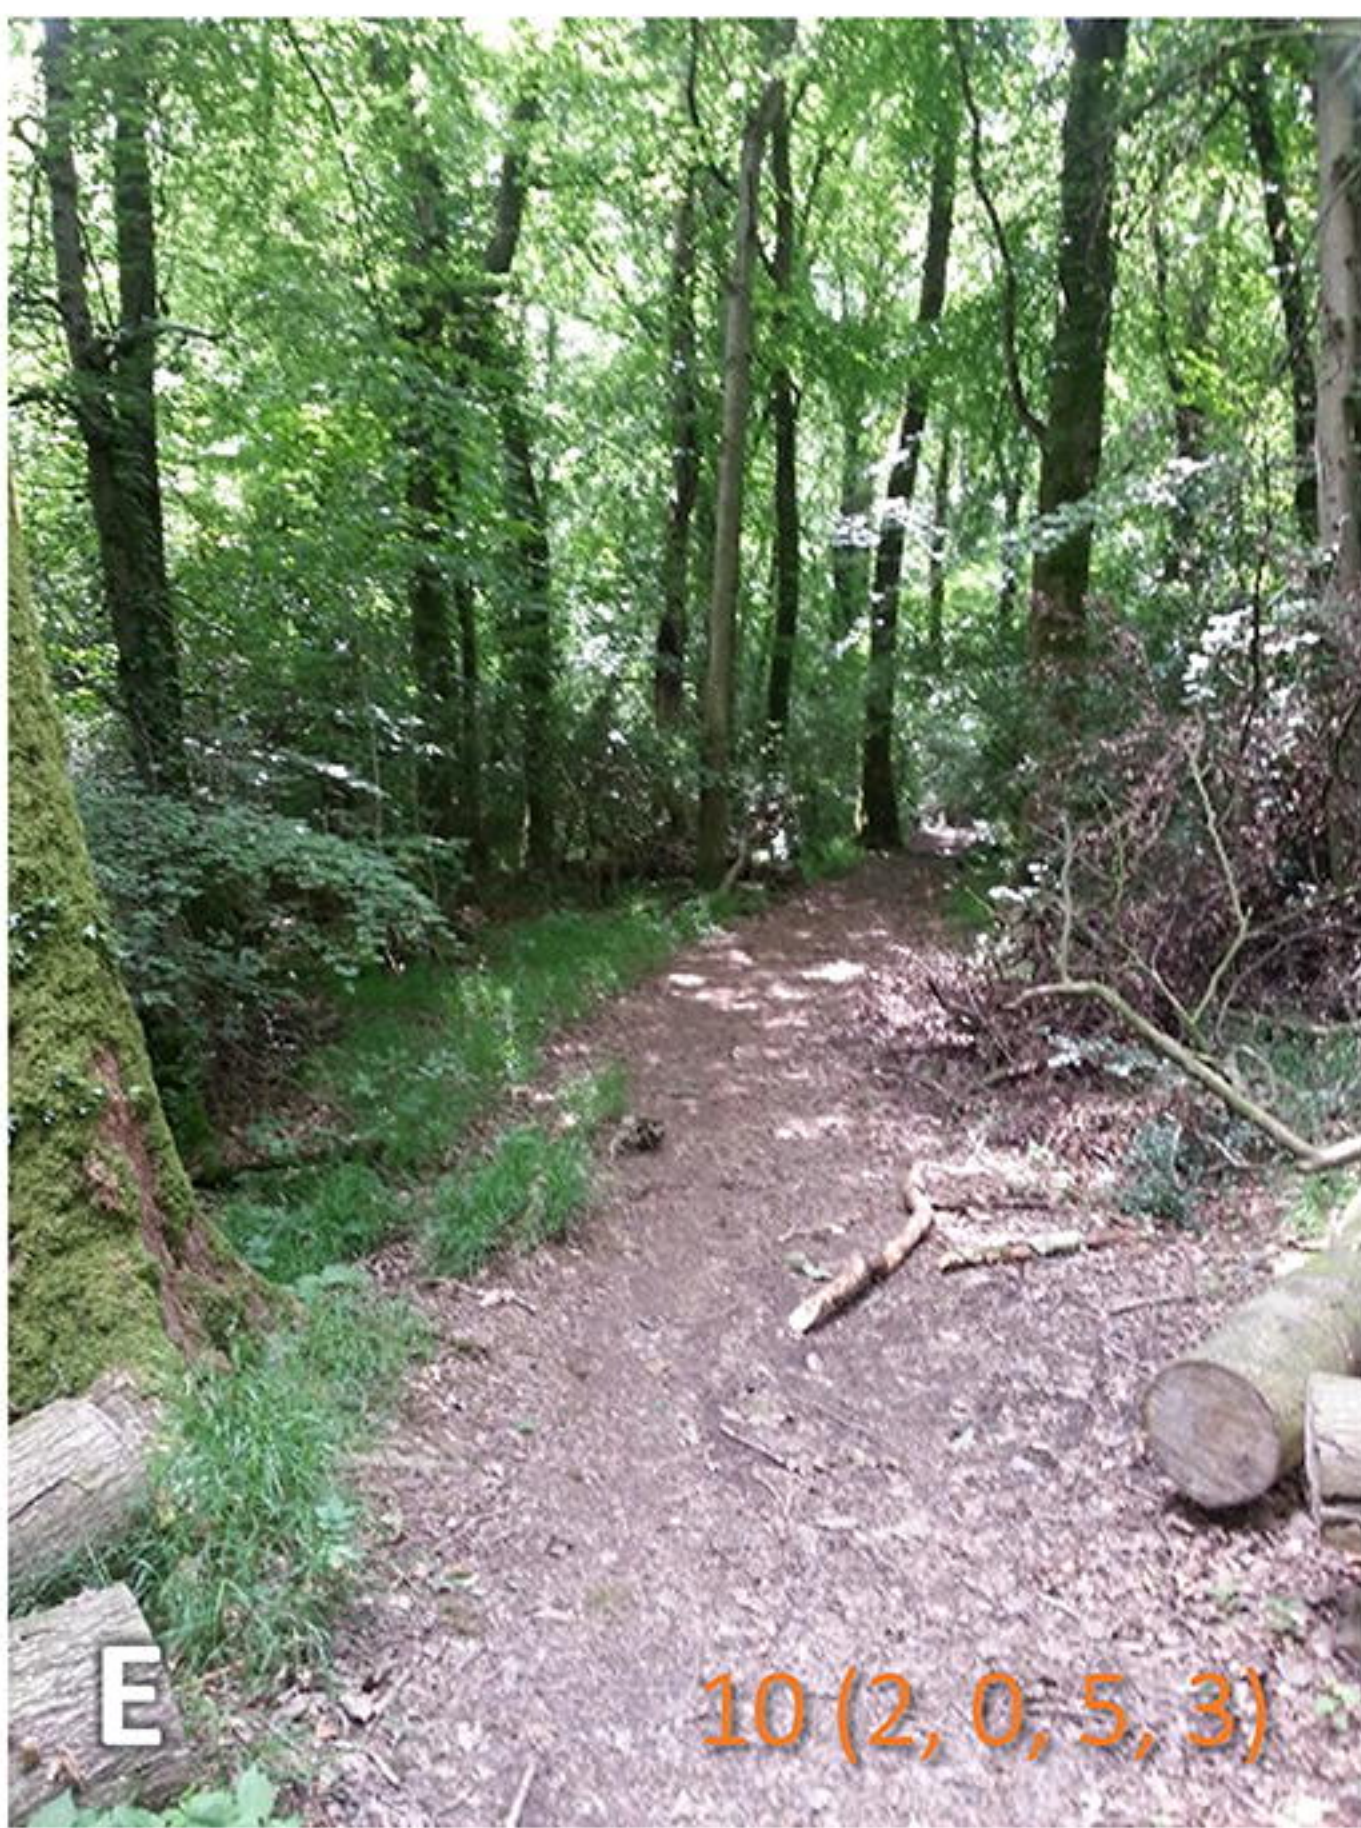

**E** 10 (2, 0, 5, 3)

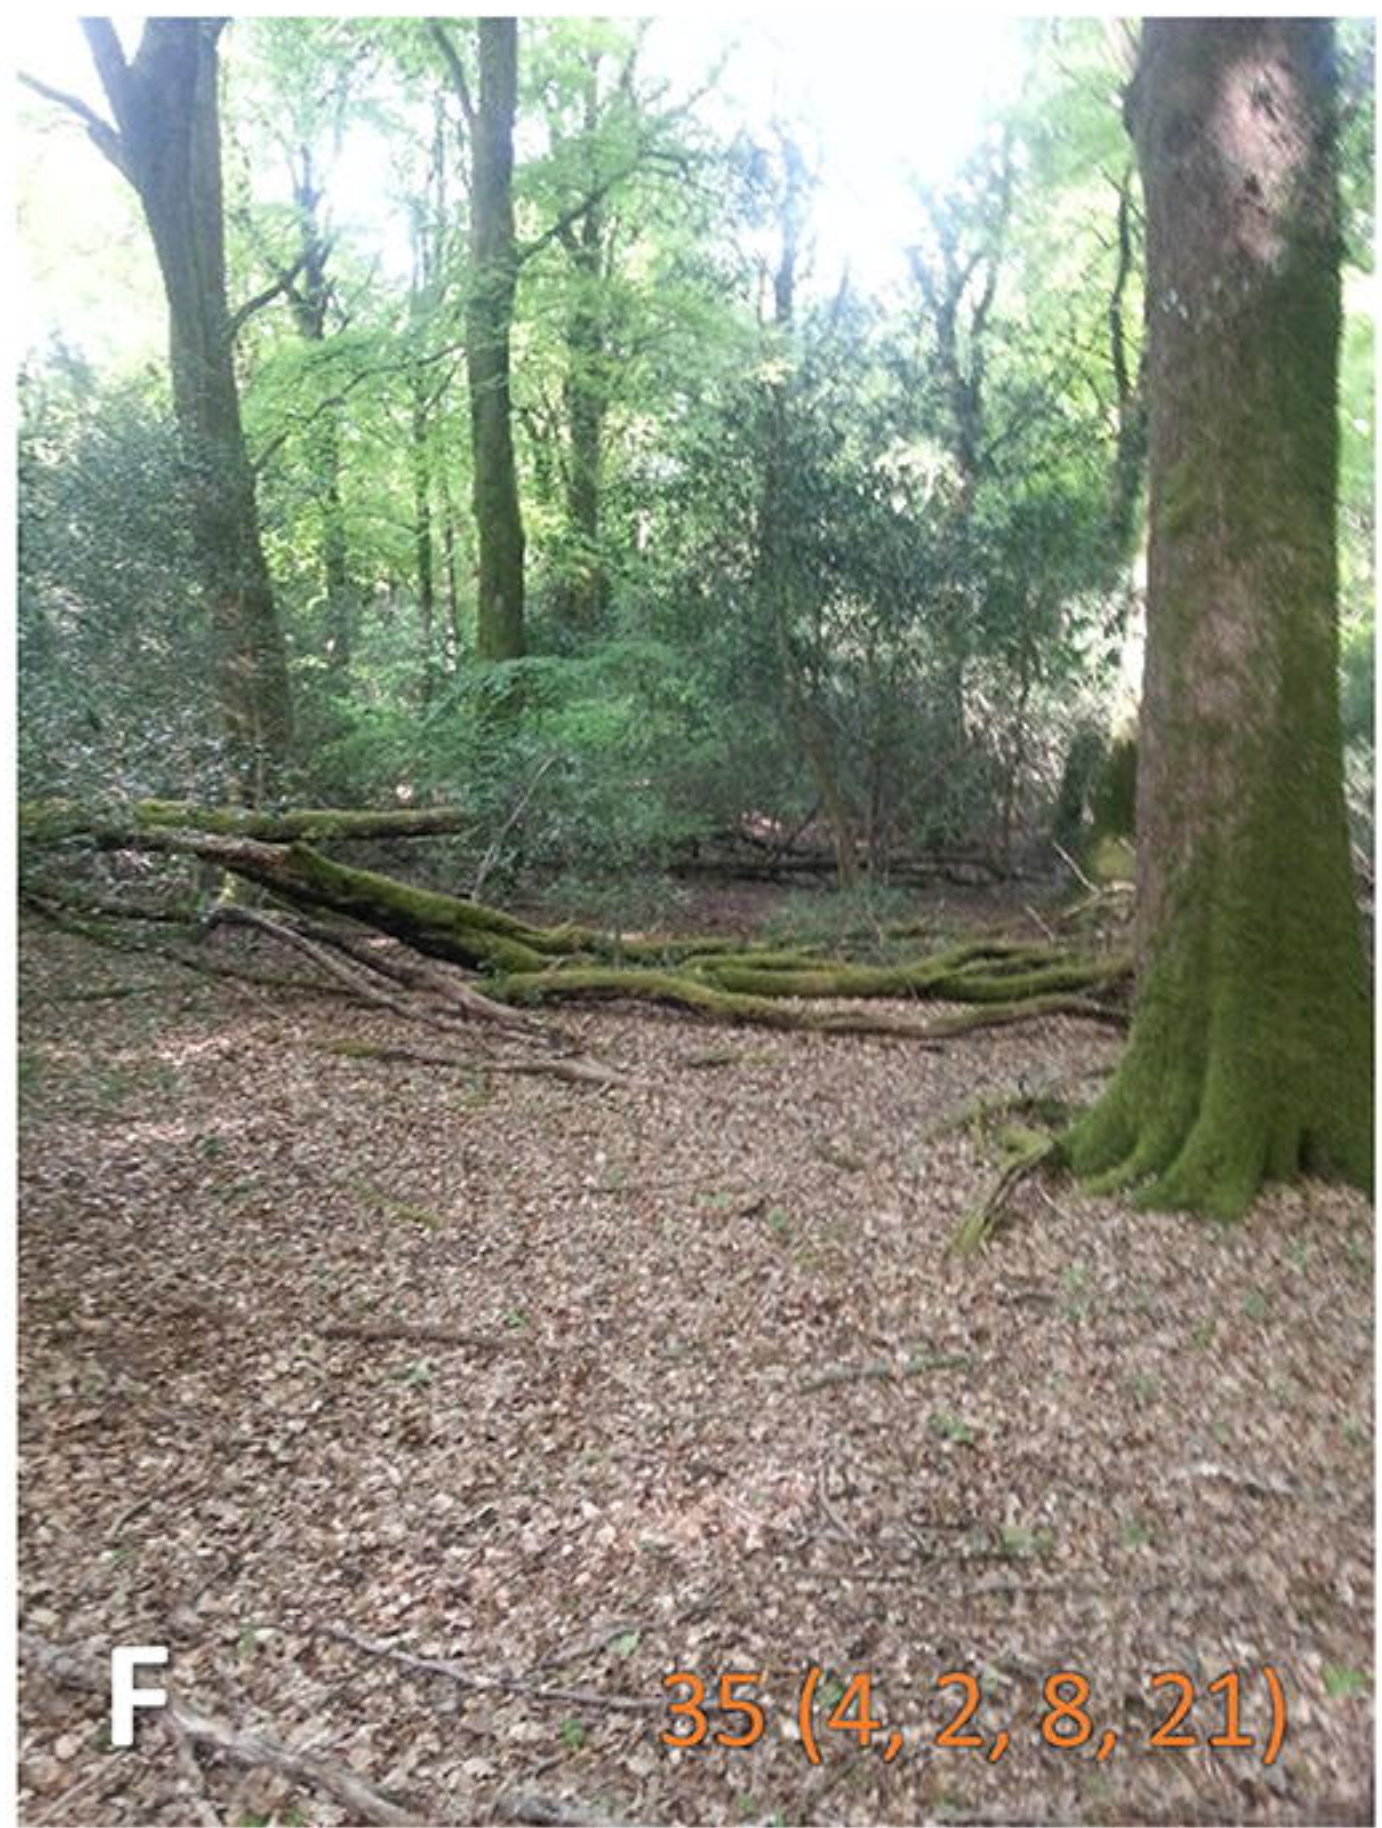

**F** 35 (4, 2, 8, 21)

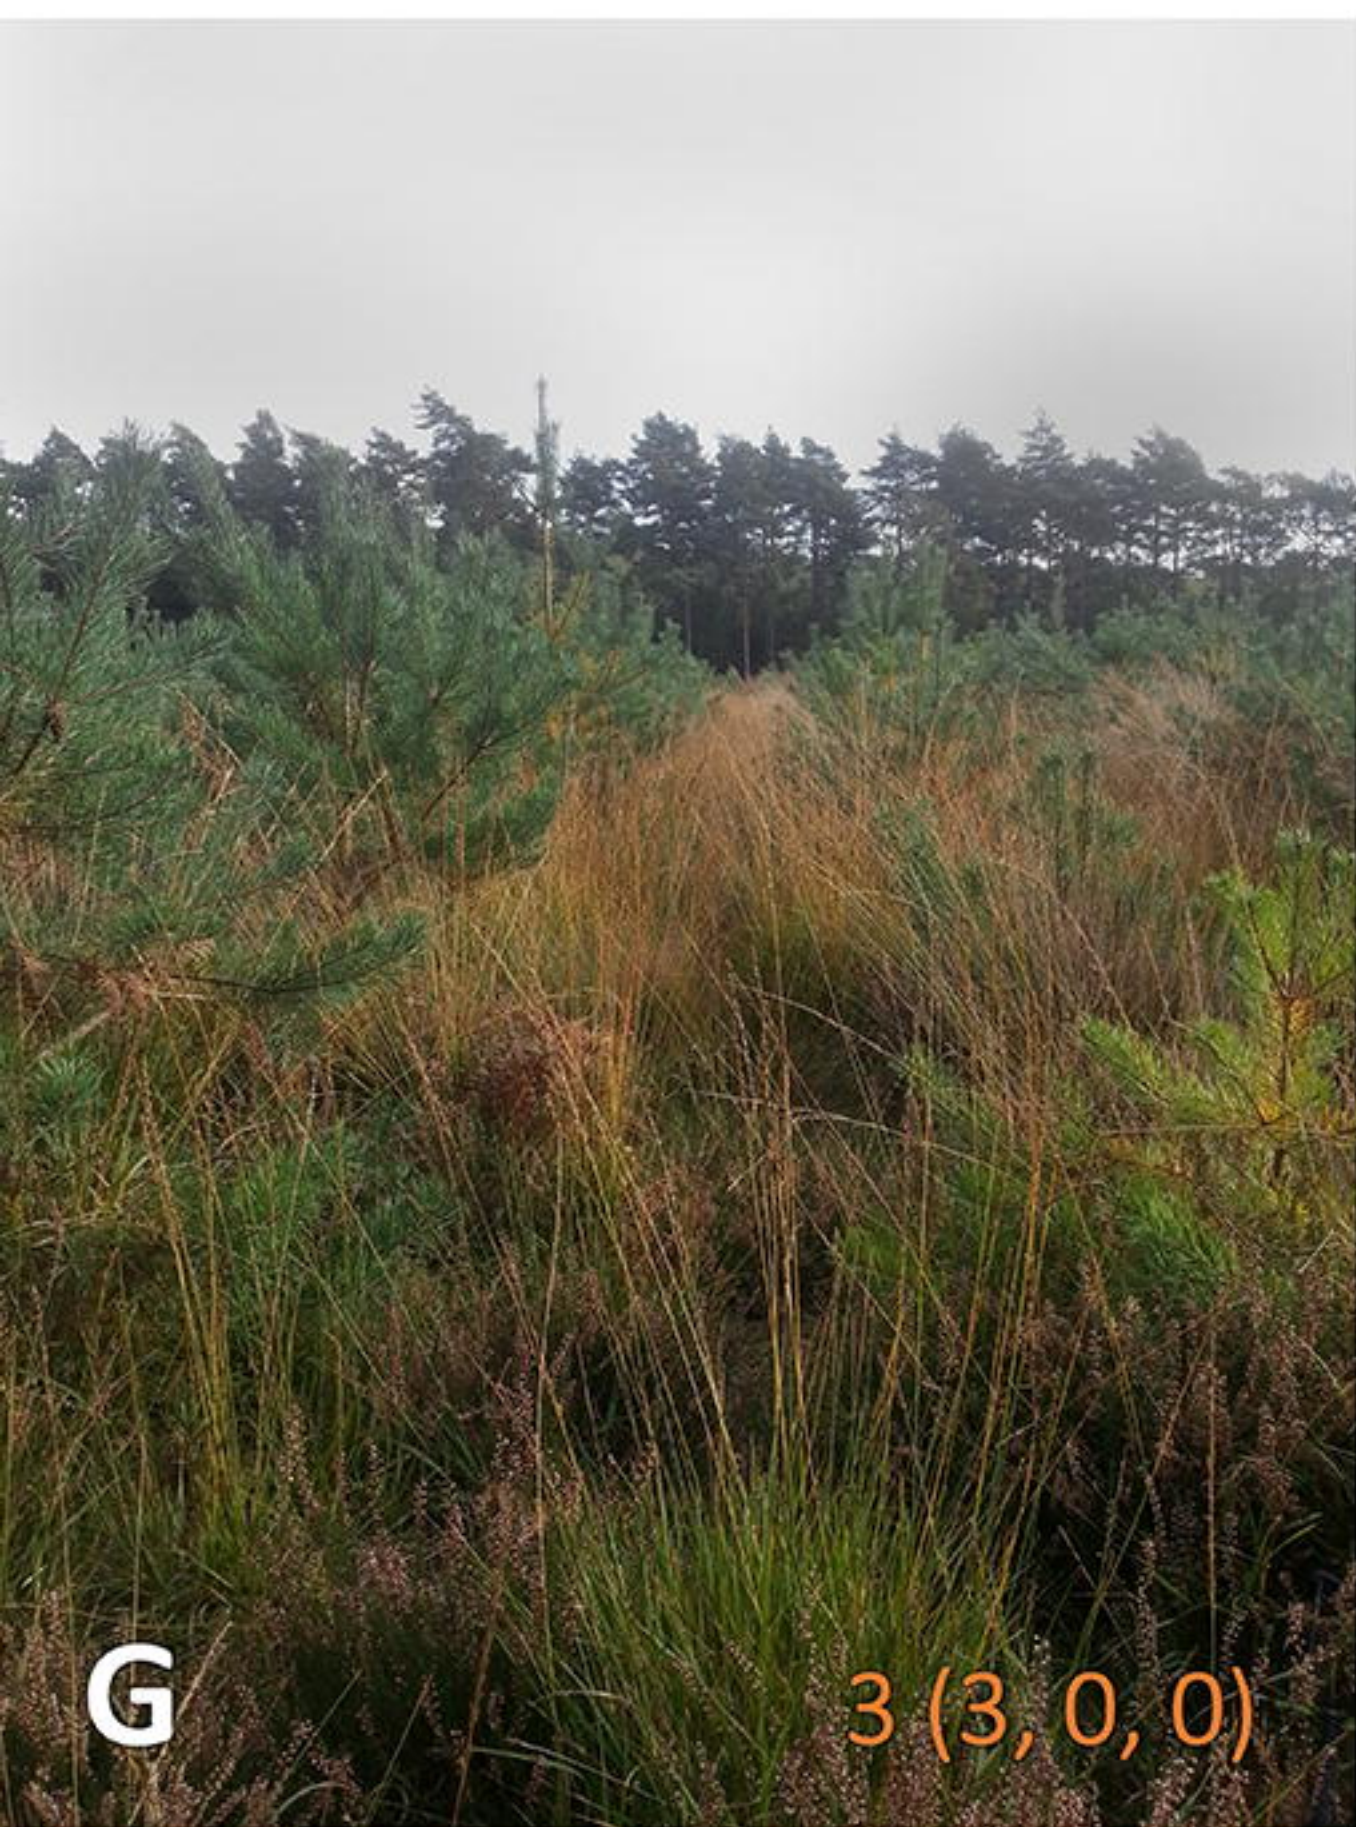

**G** 3 (3, 0, 0)

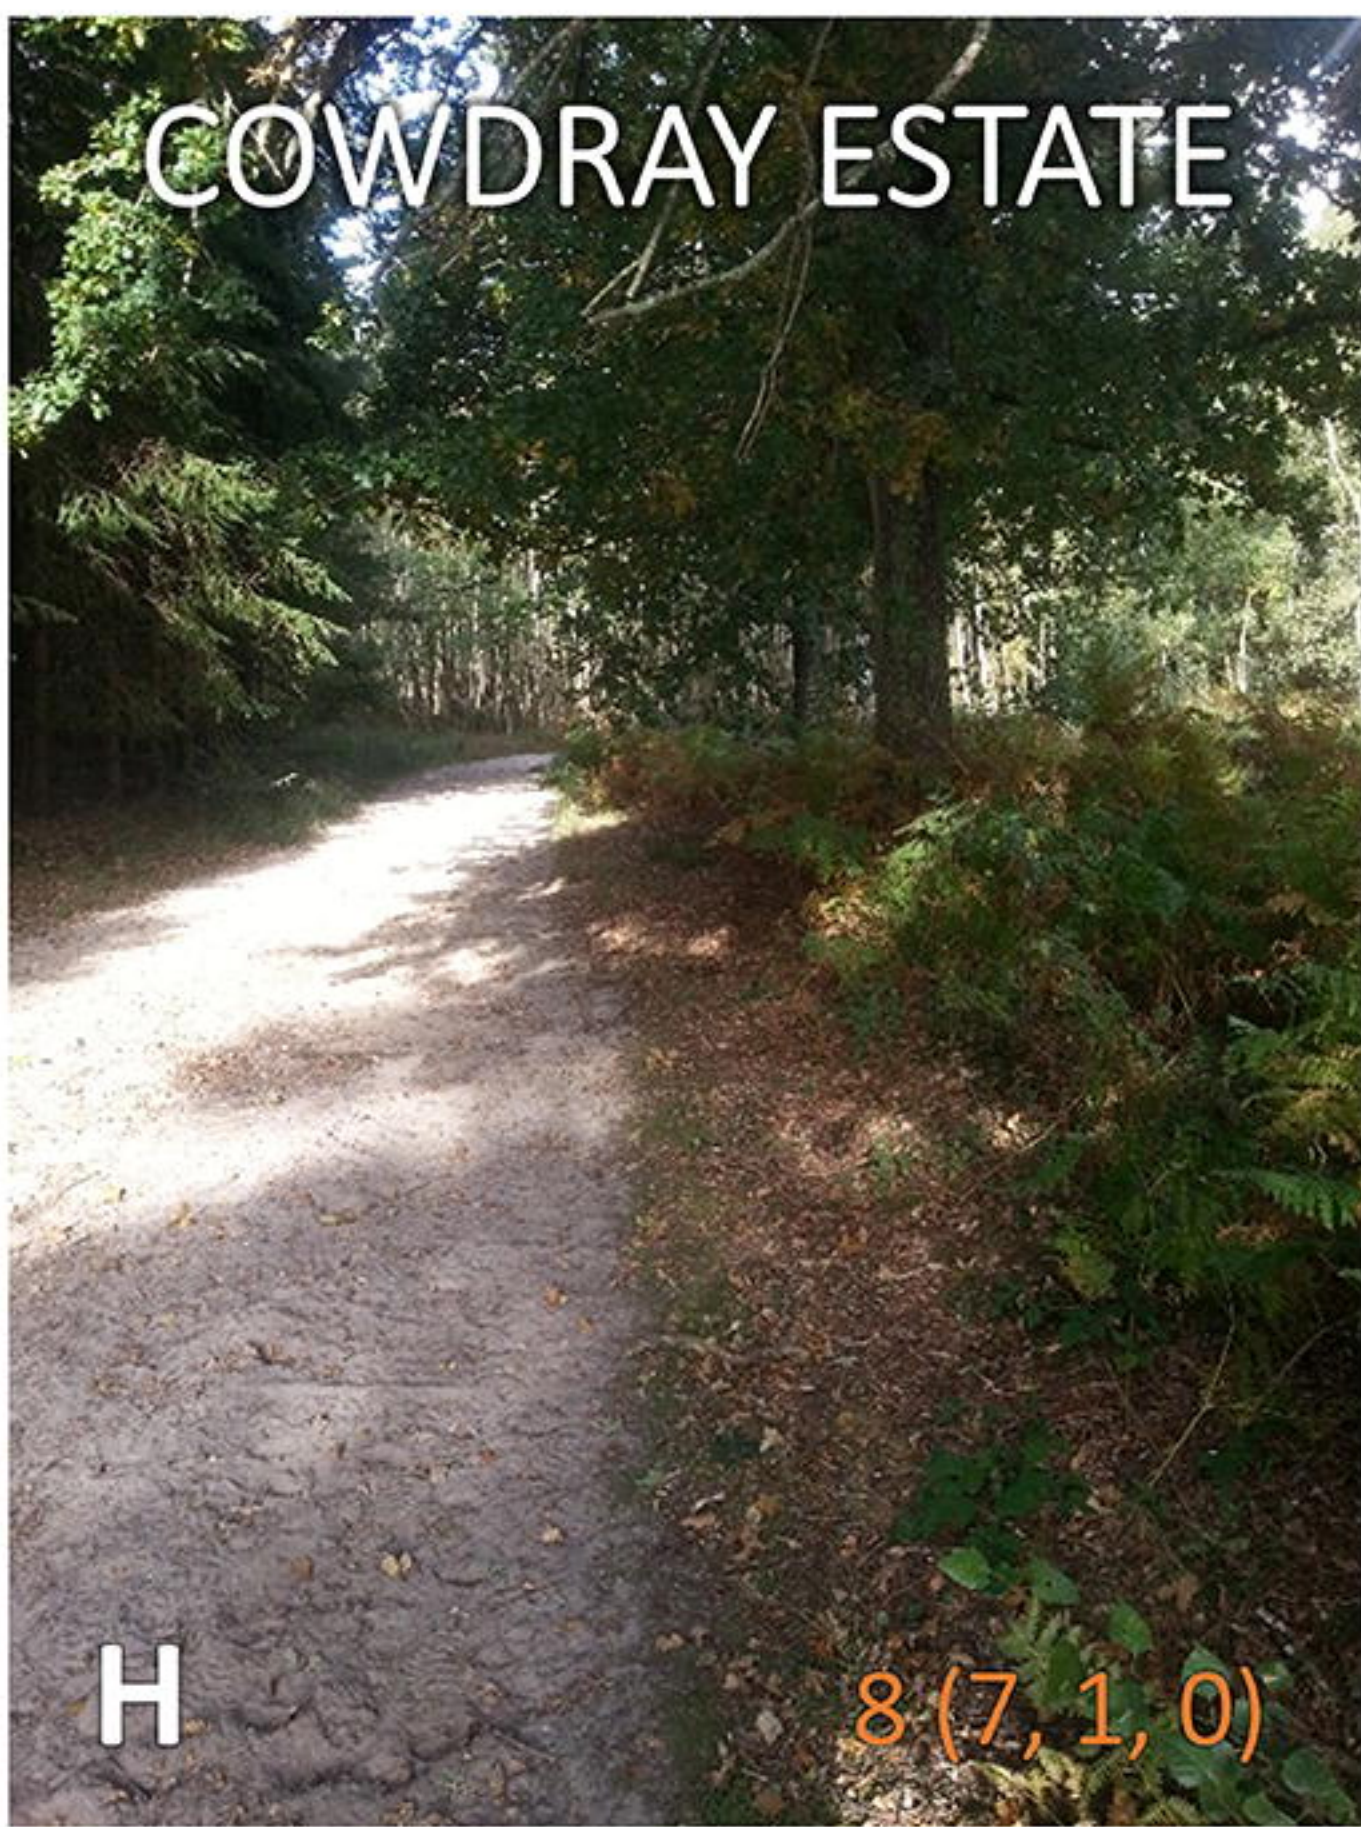

**H** 8 (7, 1, 0)

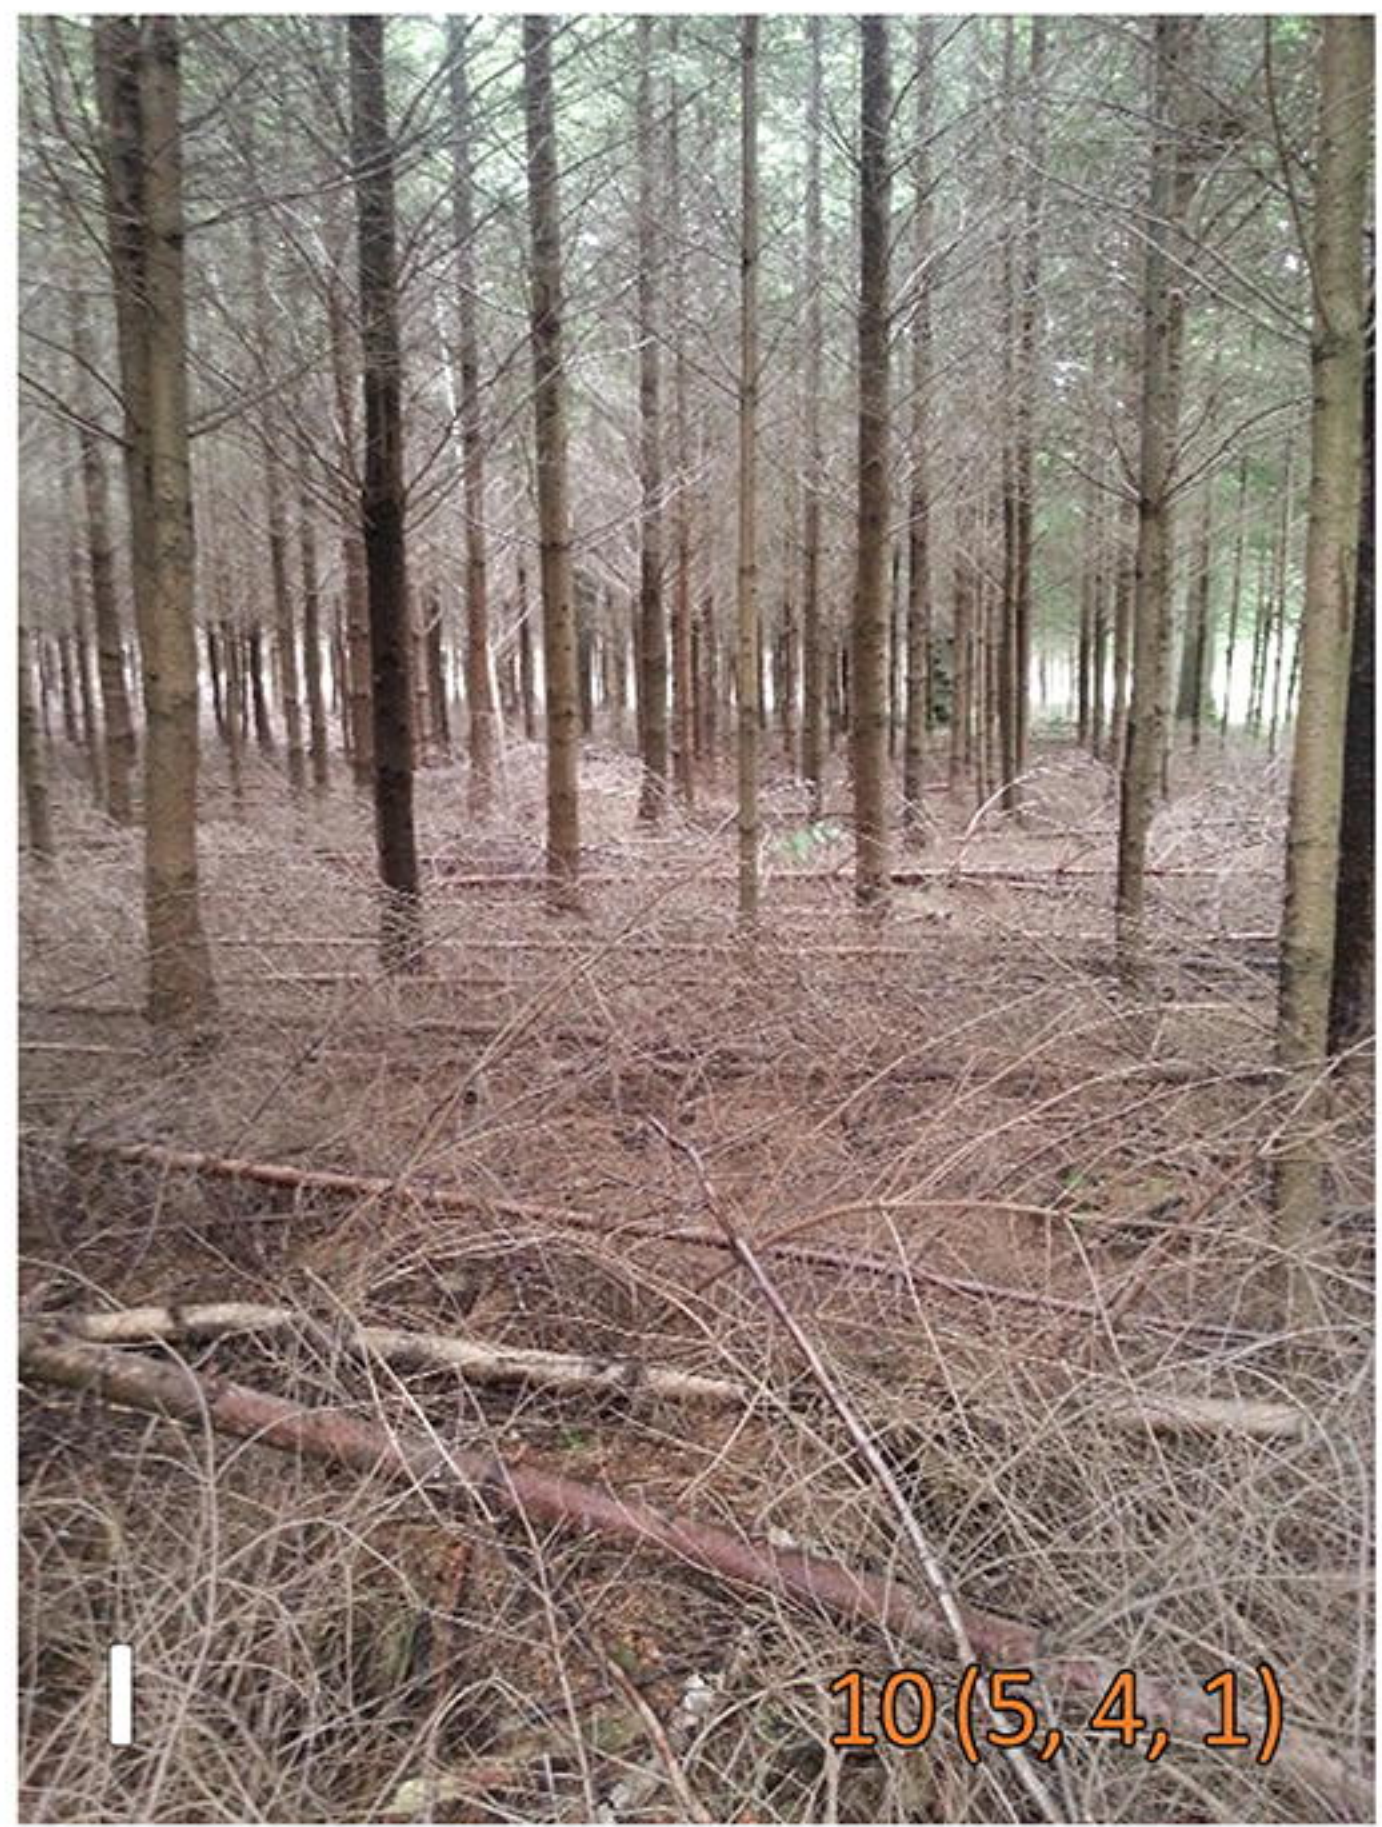

**I** 10 (5, 4, 1)

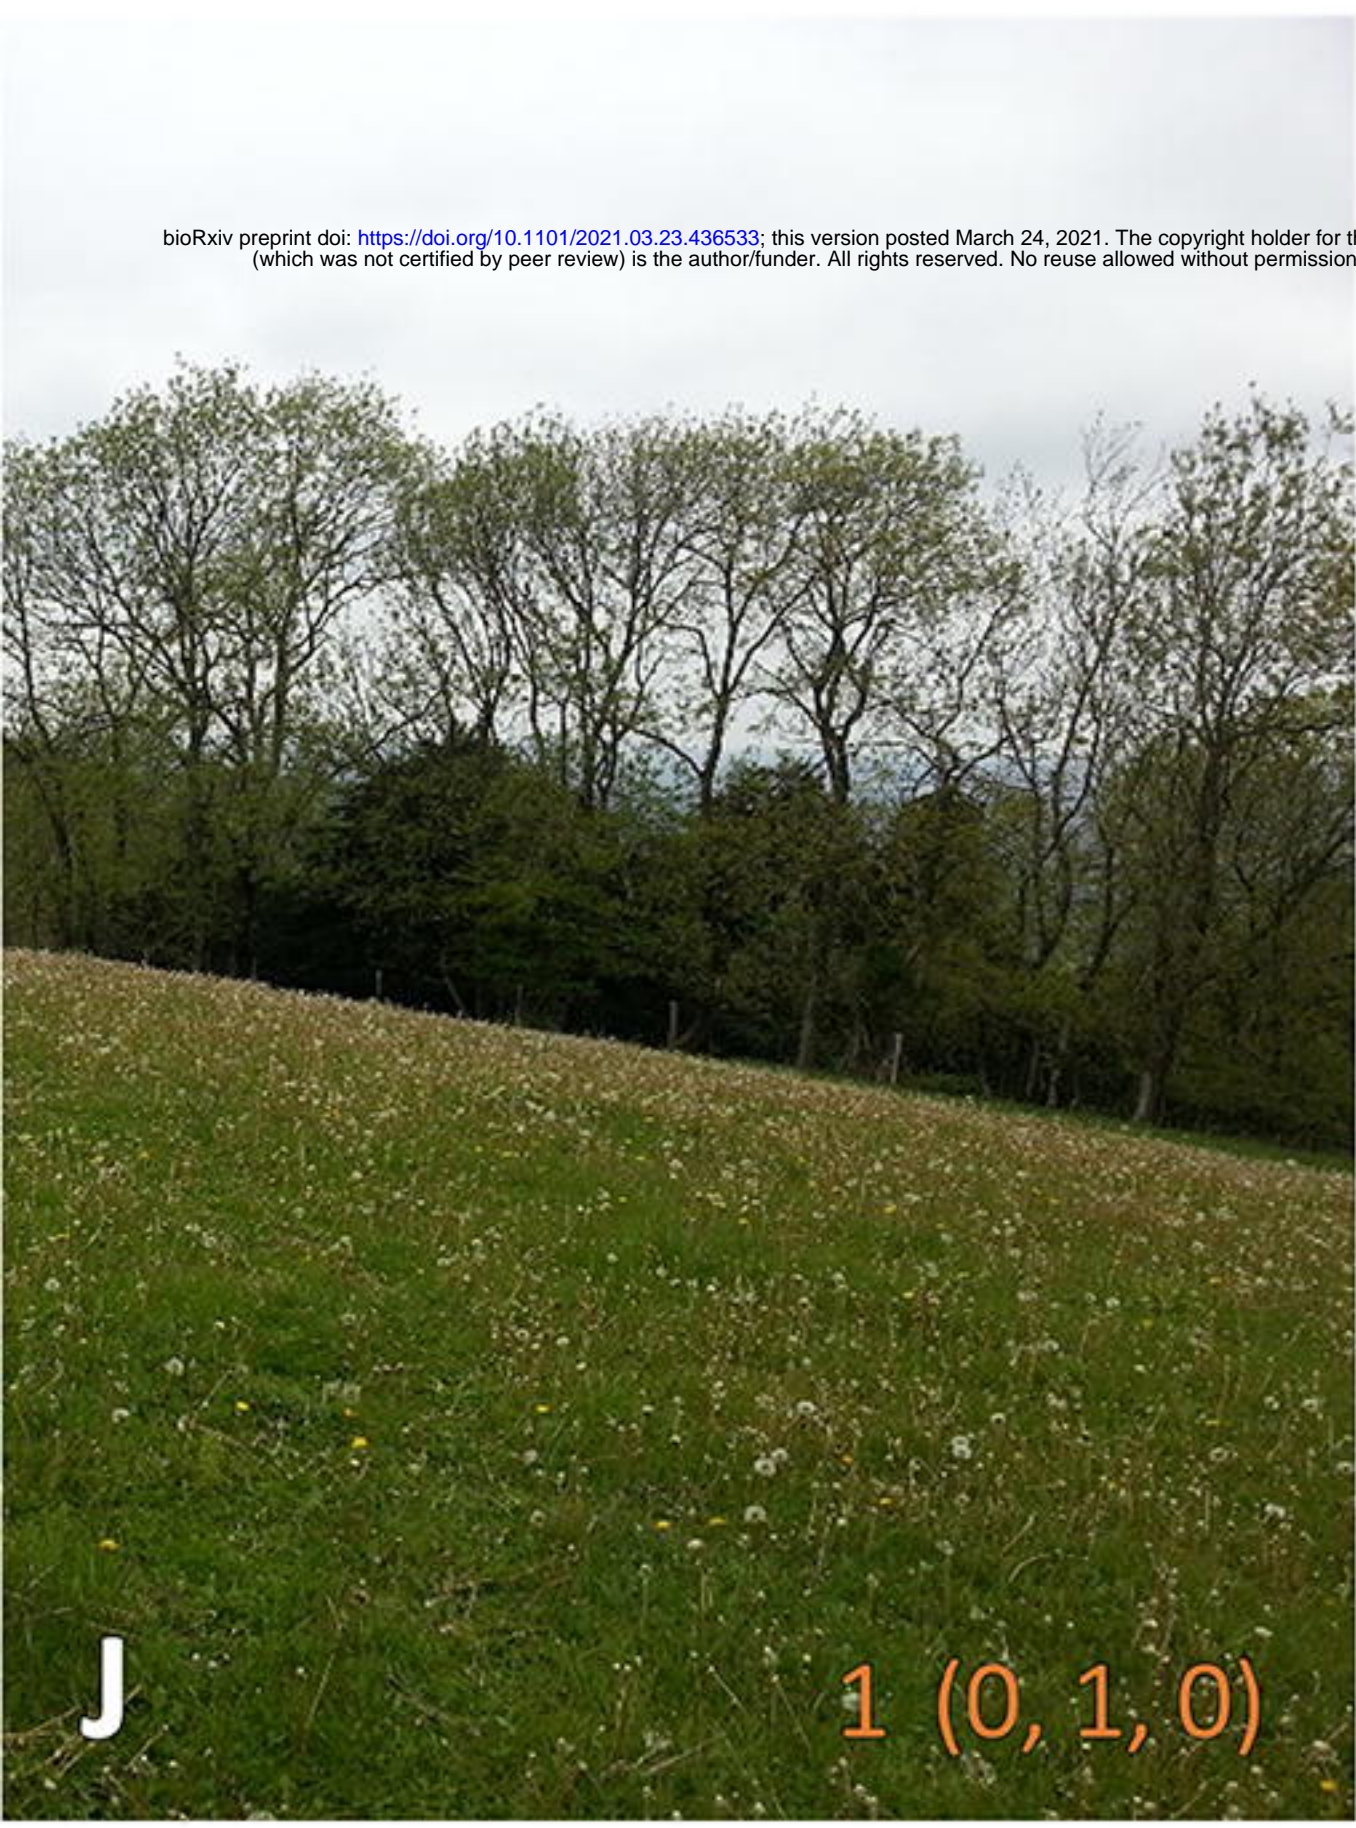

**J** 1 (0, 1, 0)

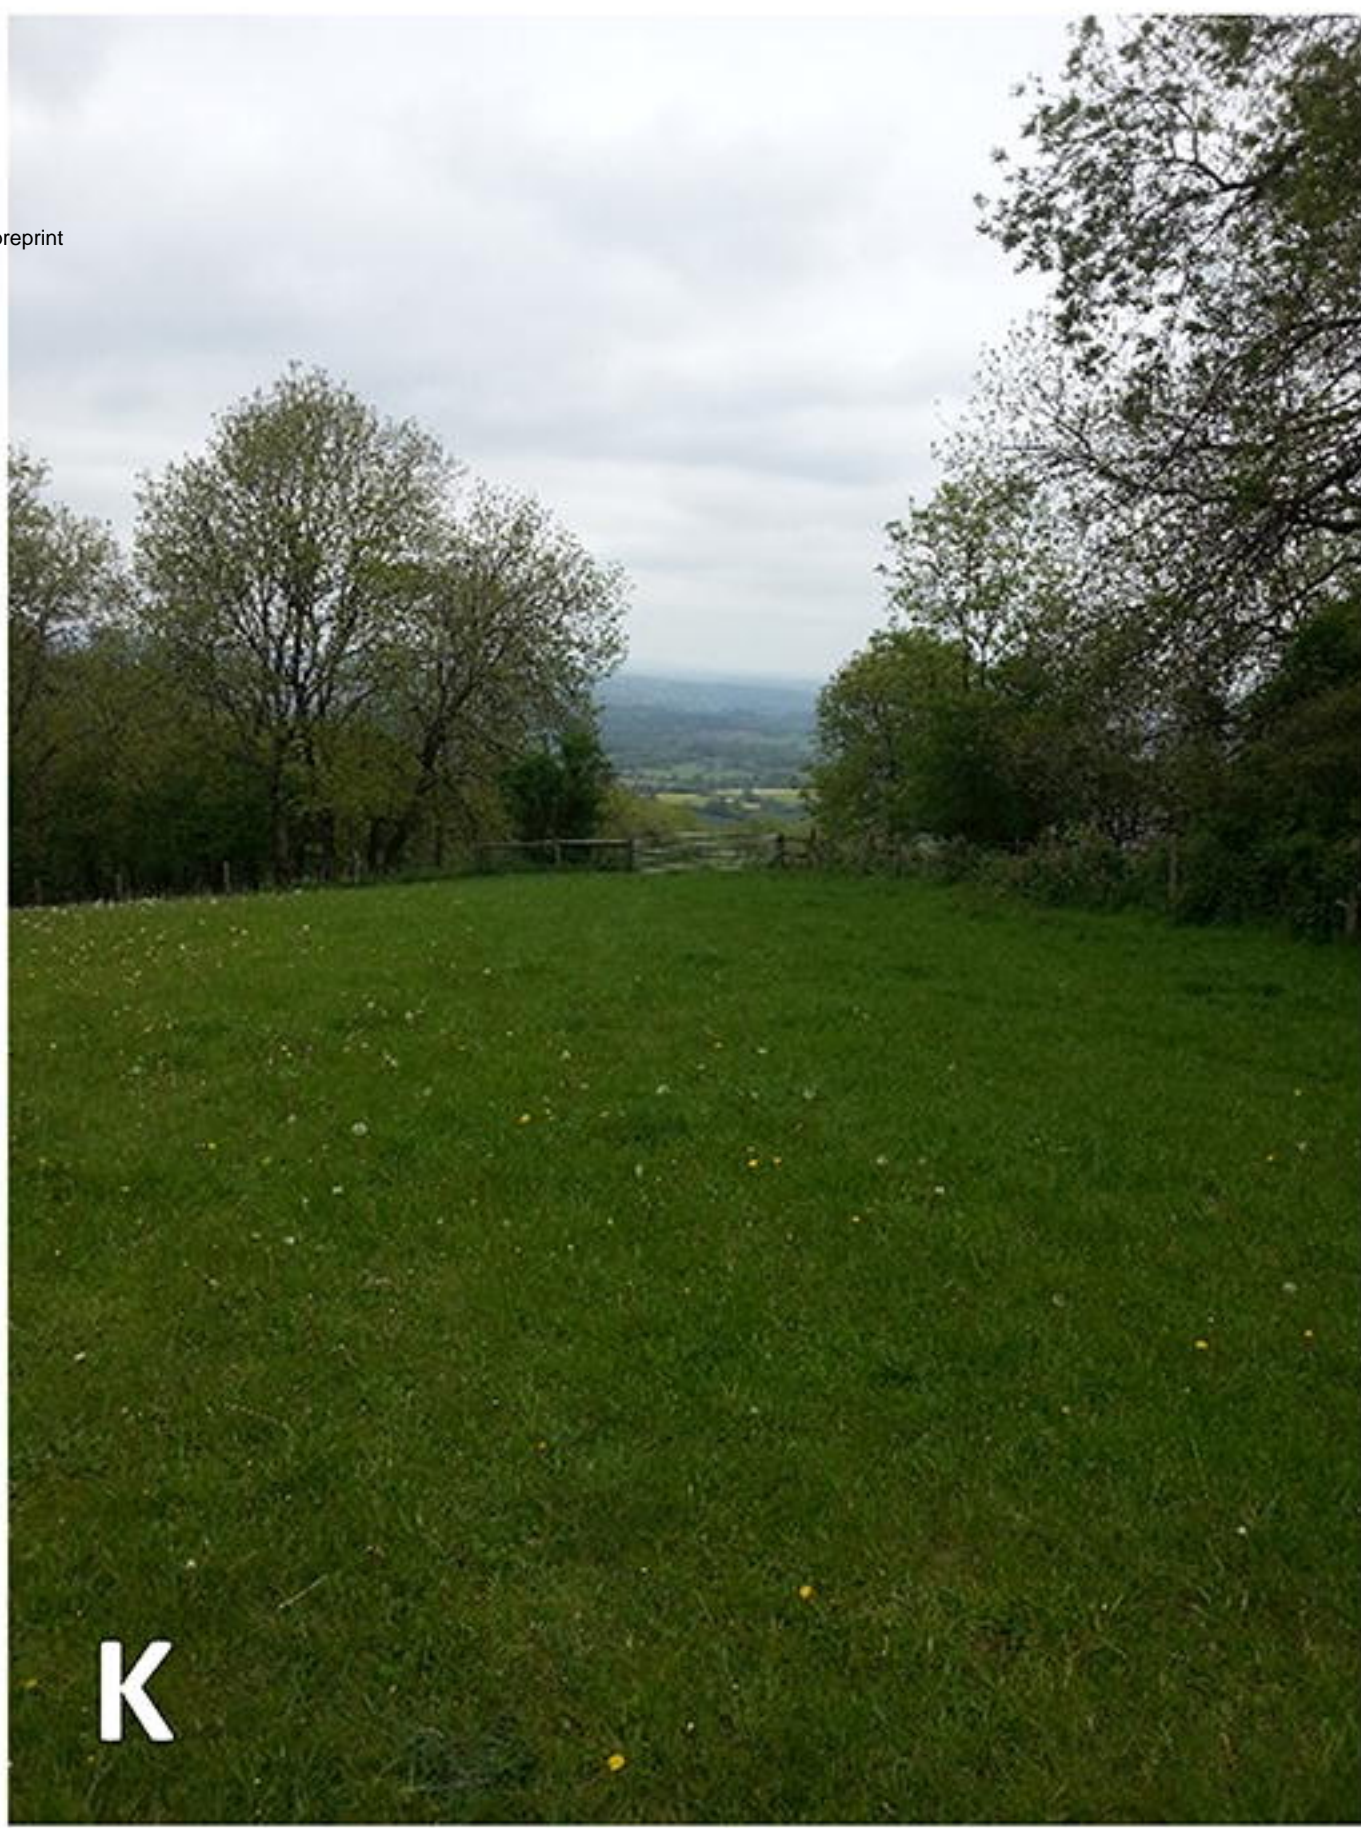

**K**

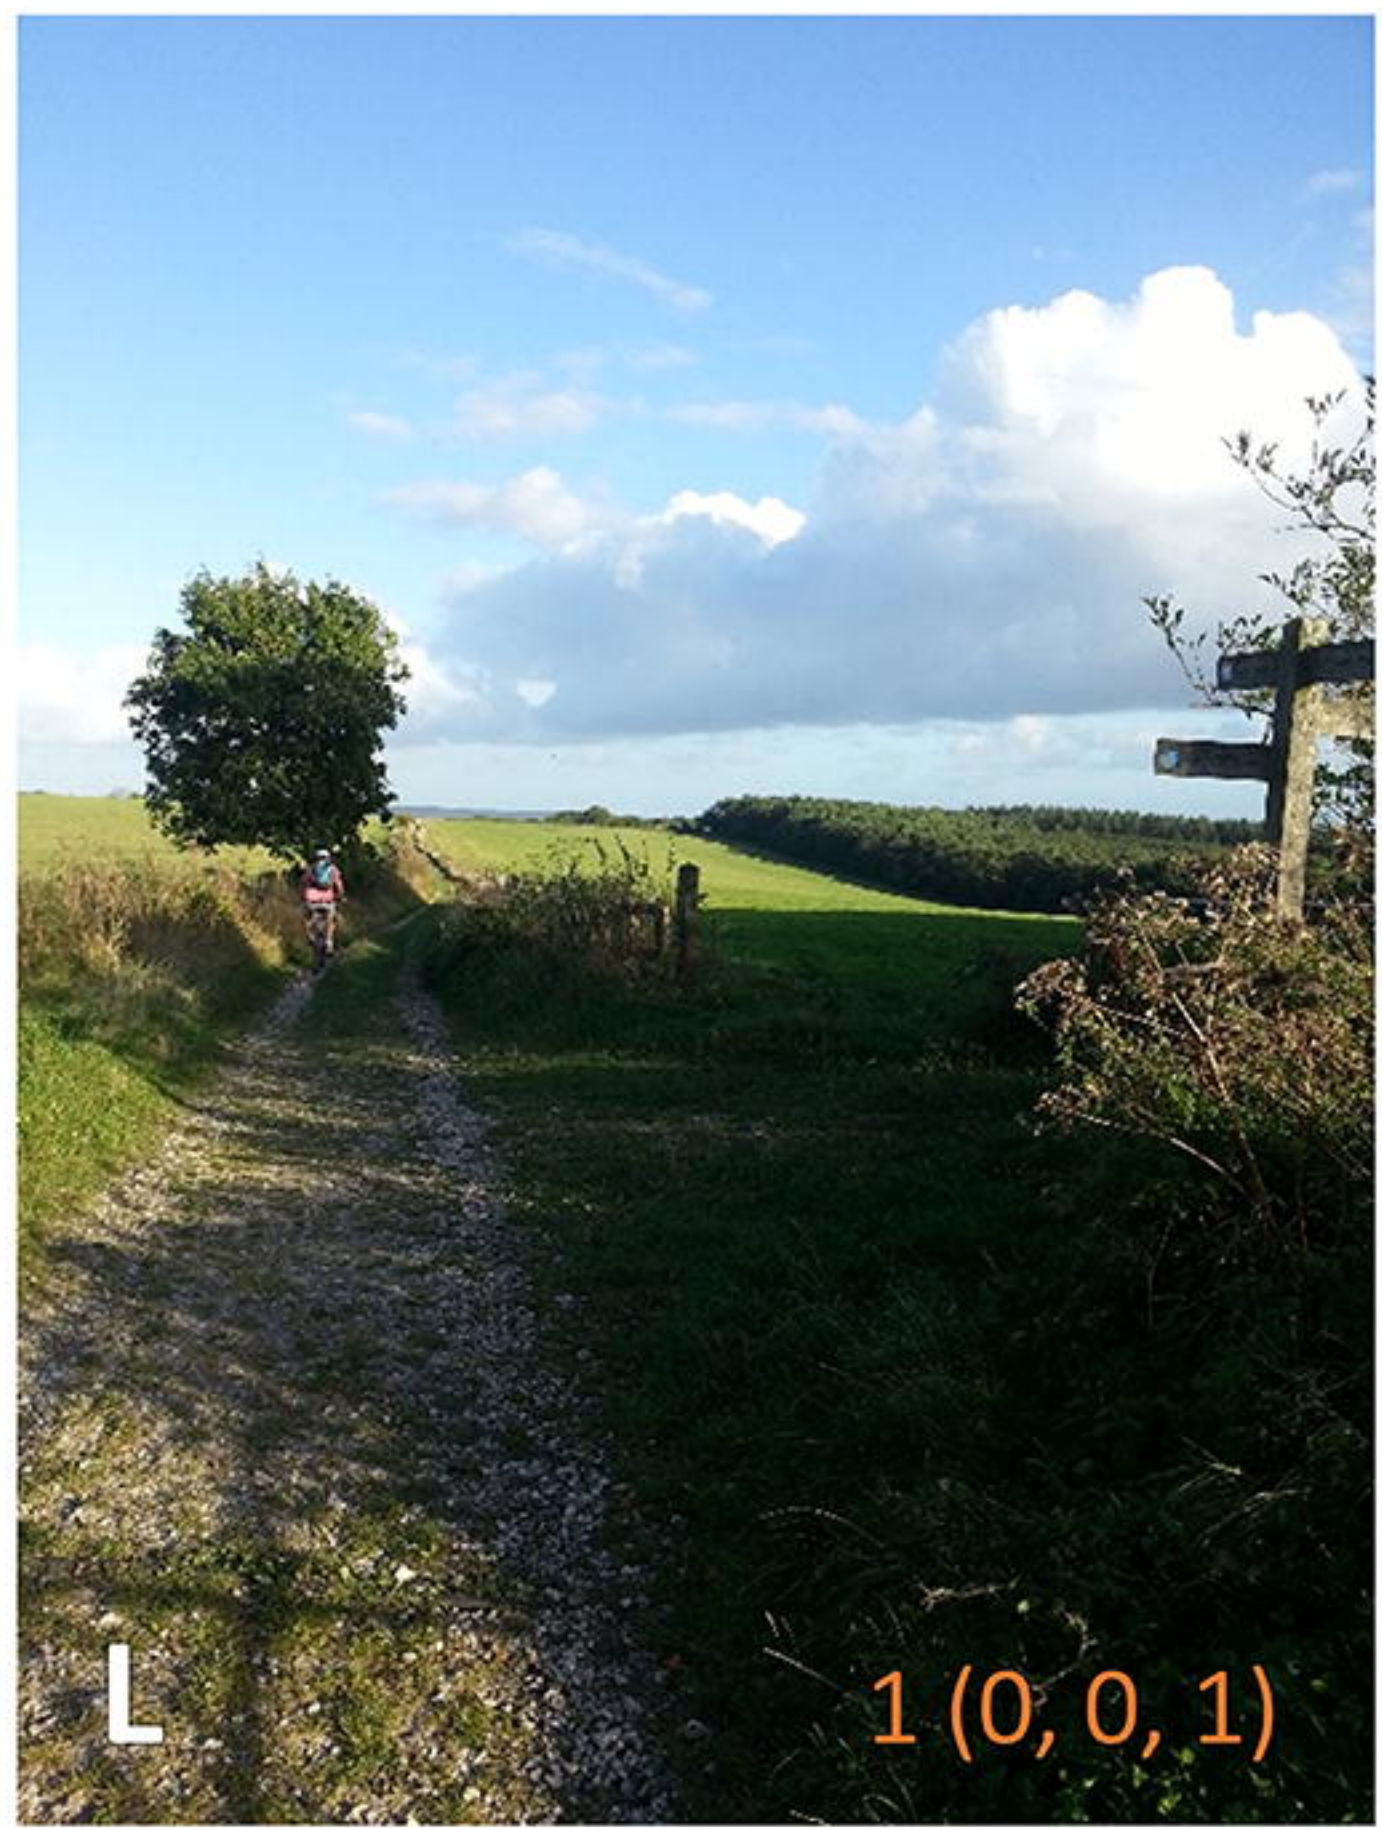

**L** 1 (0, 0, 1)

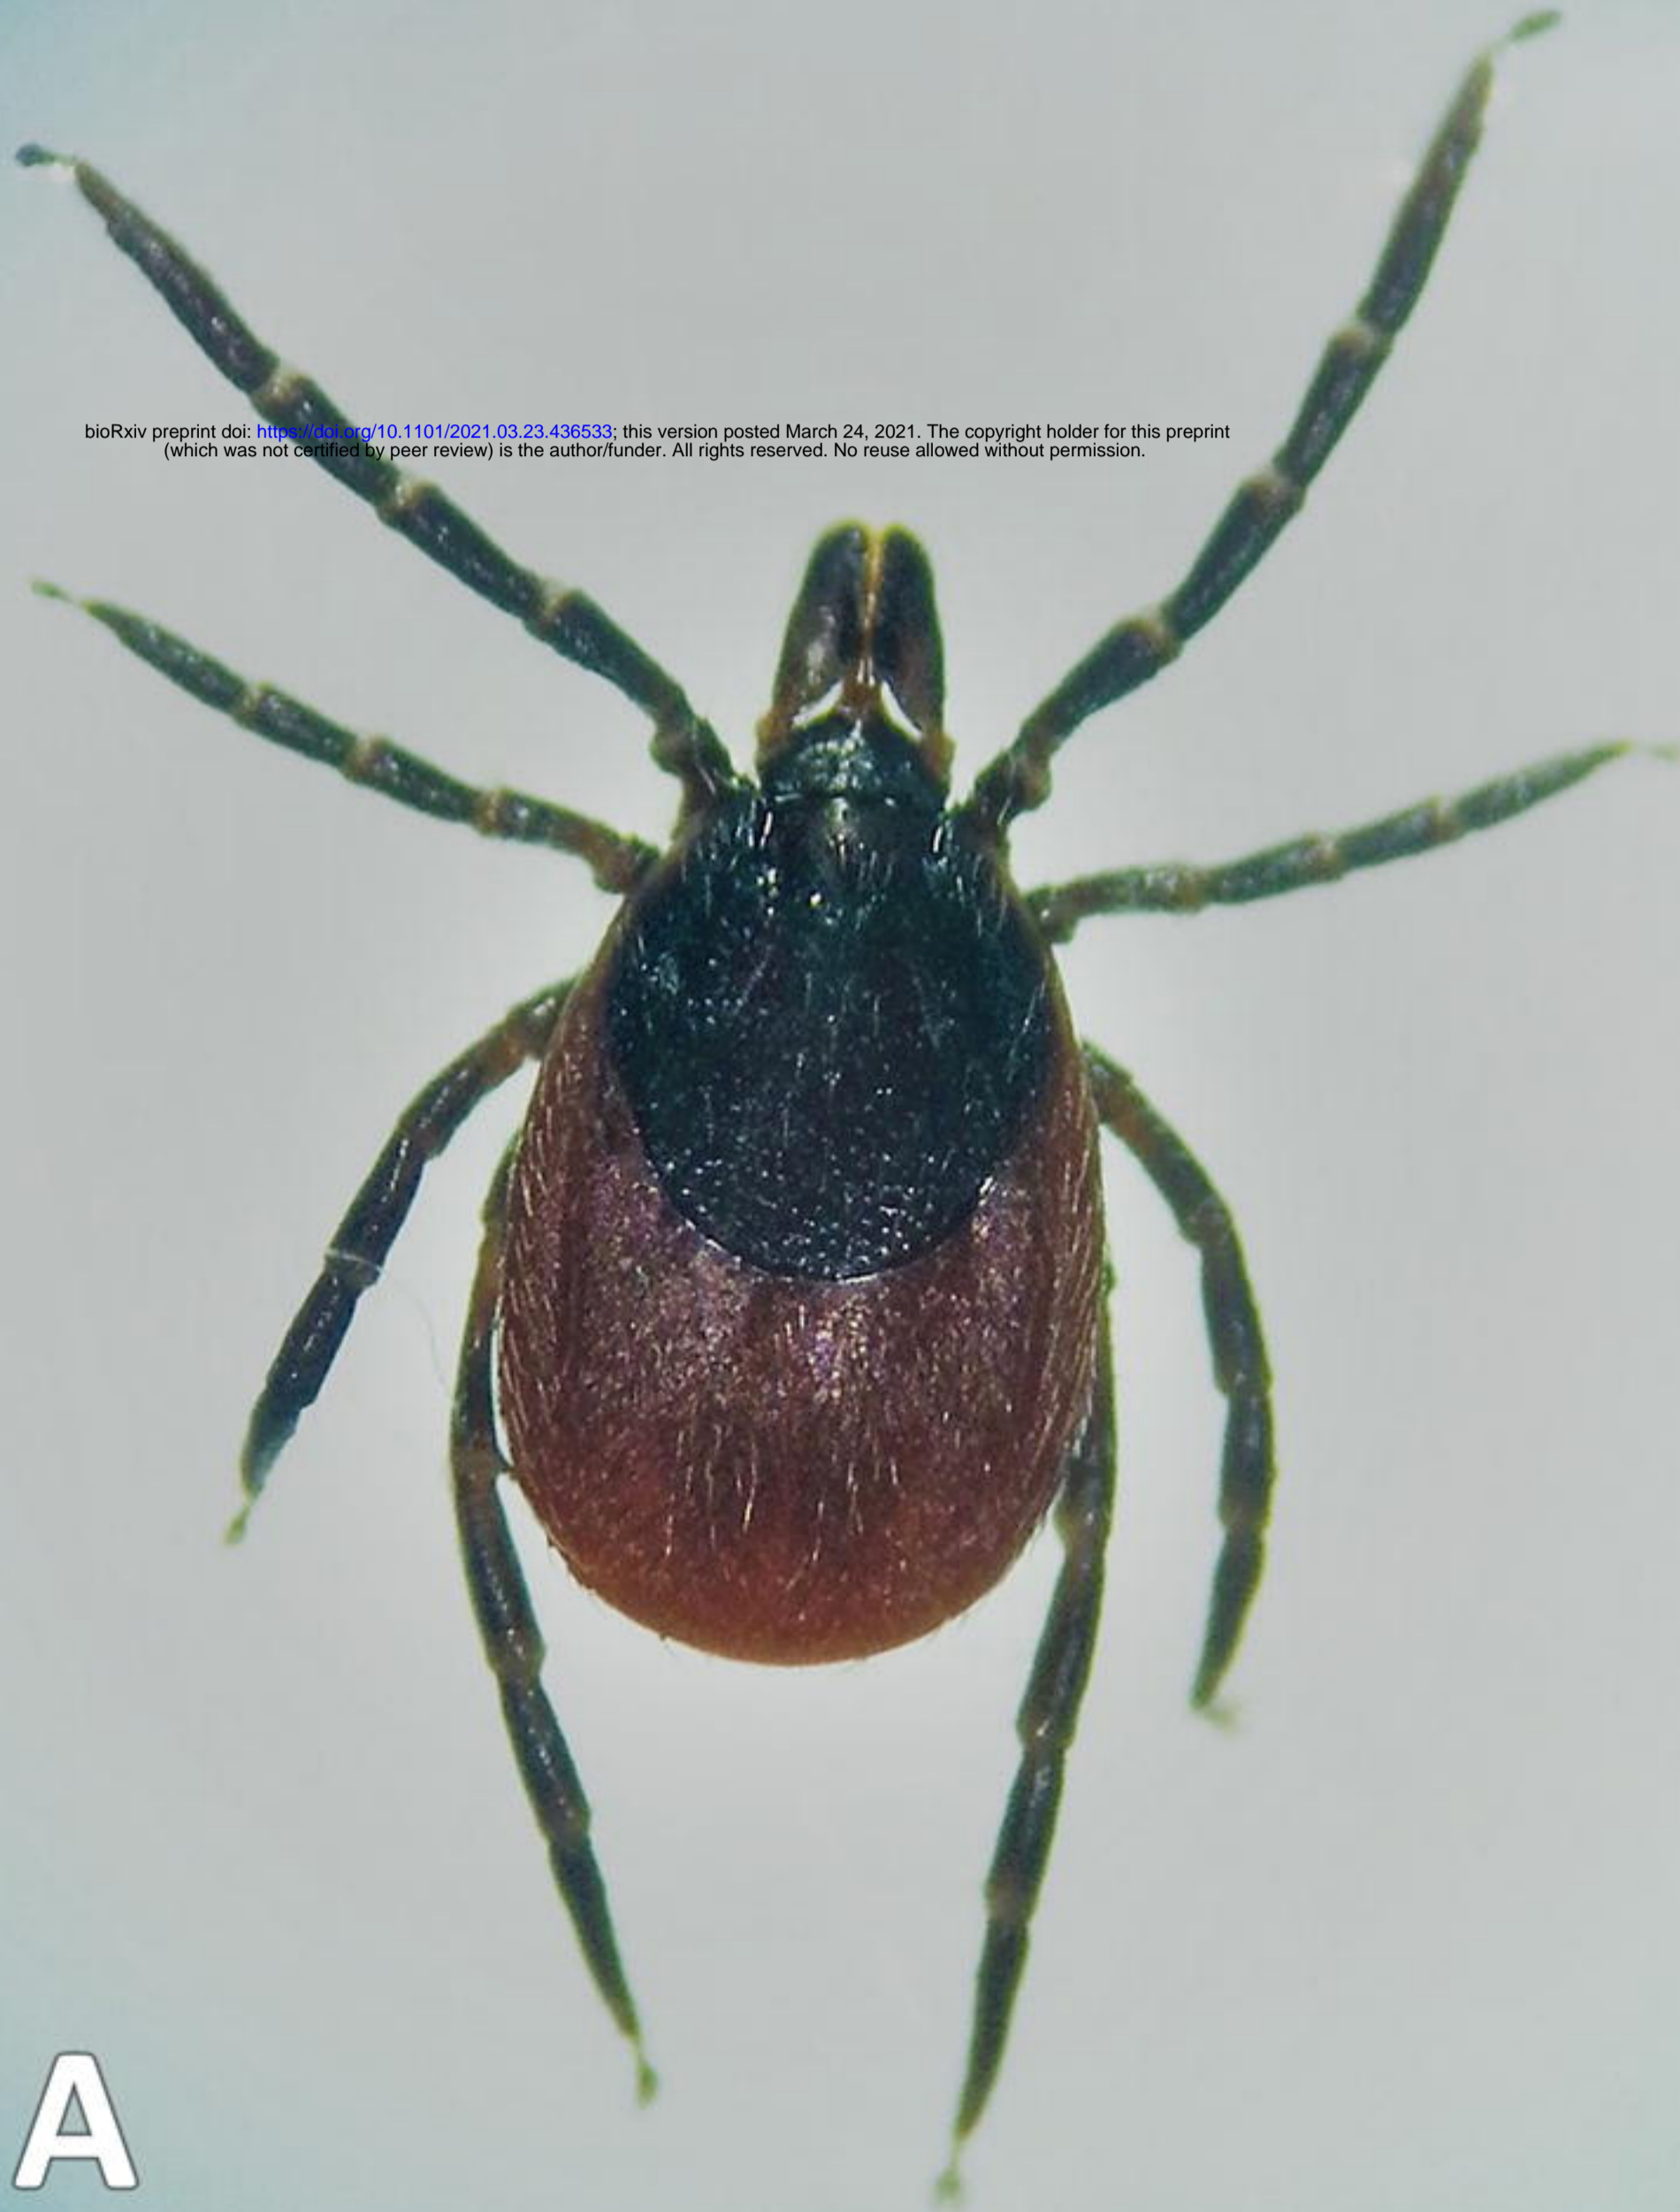

A

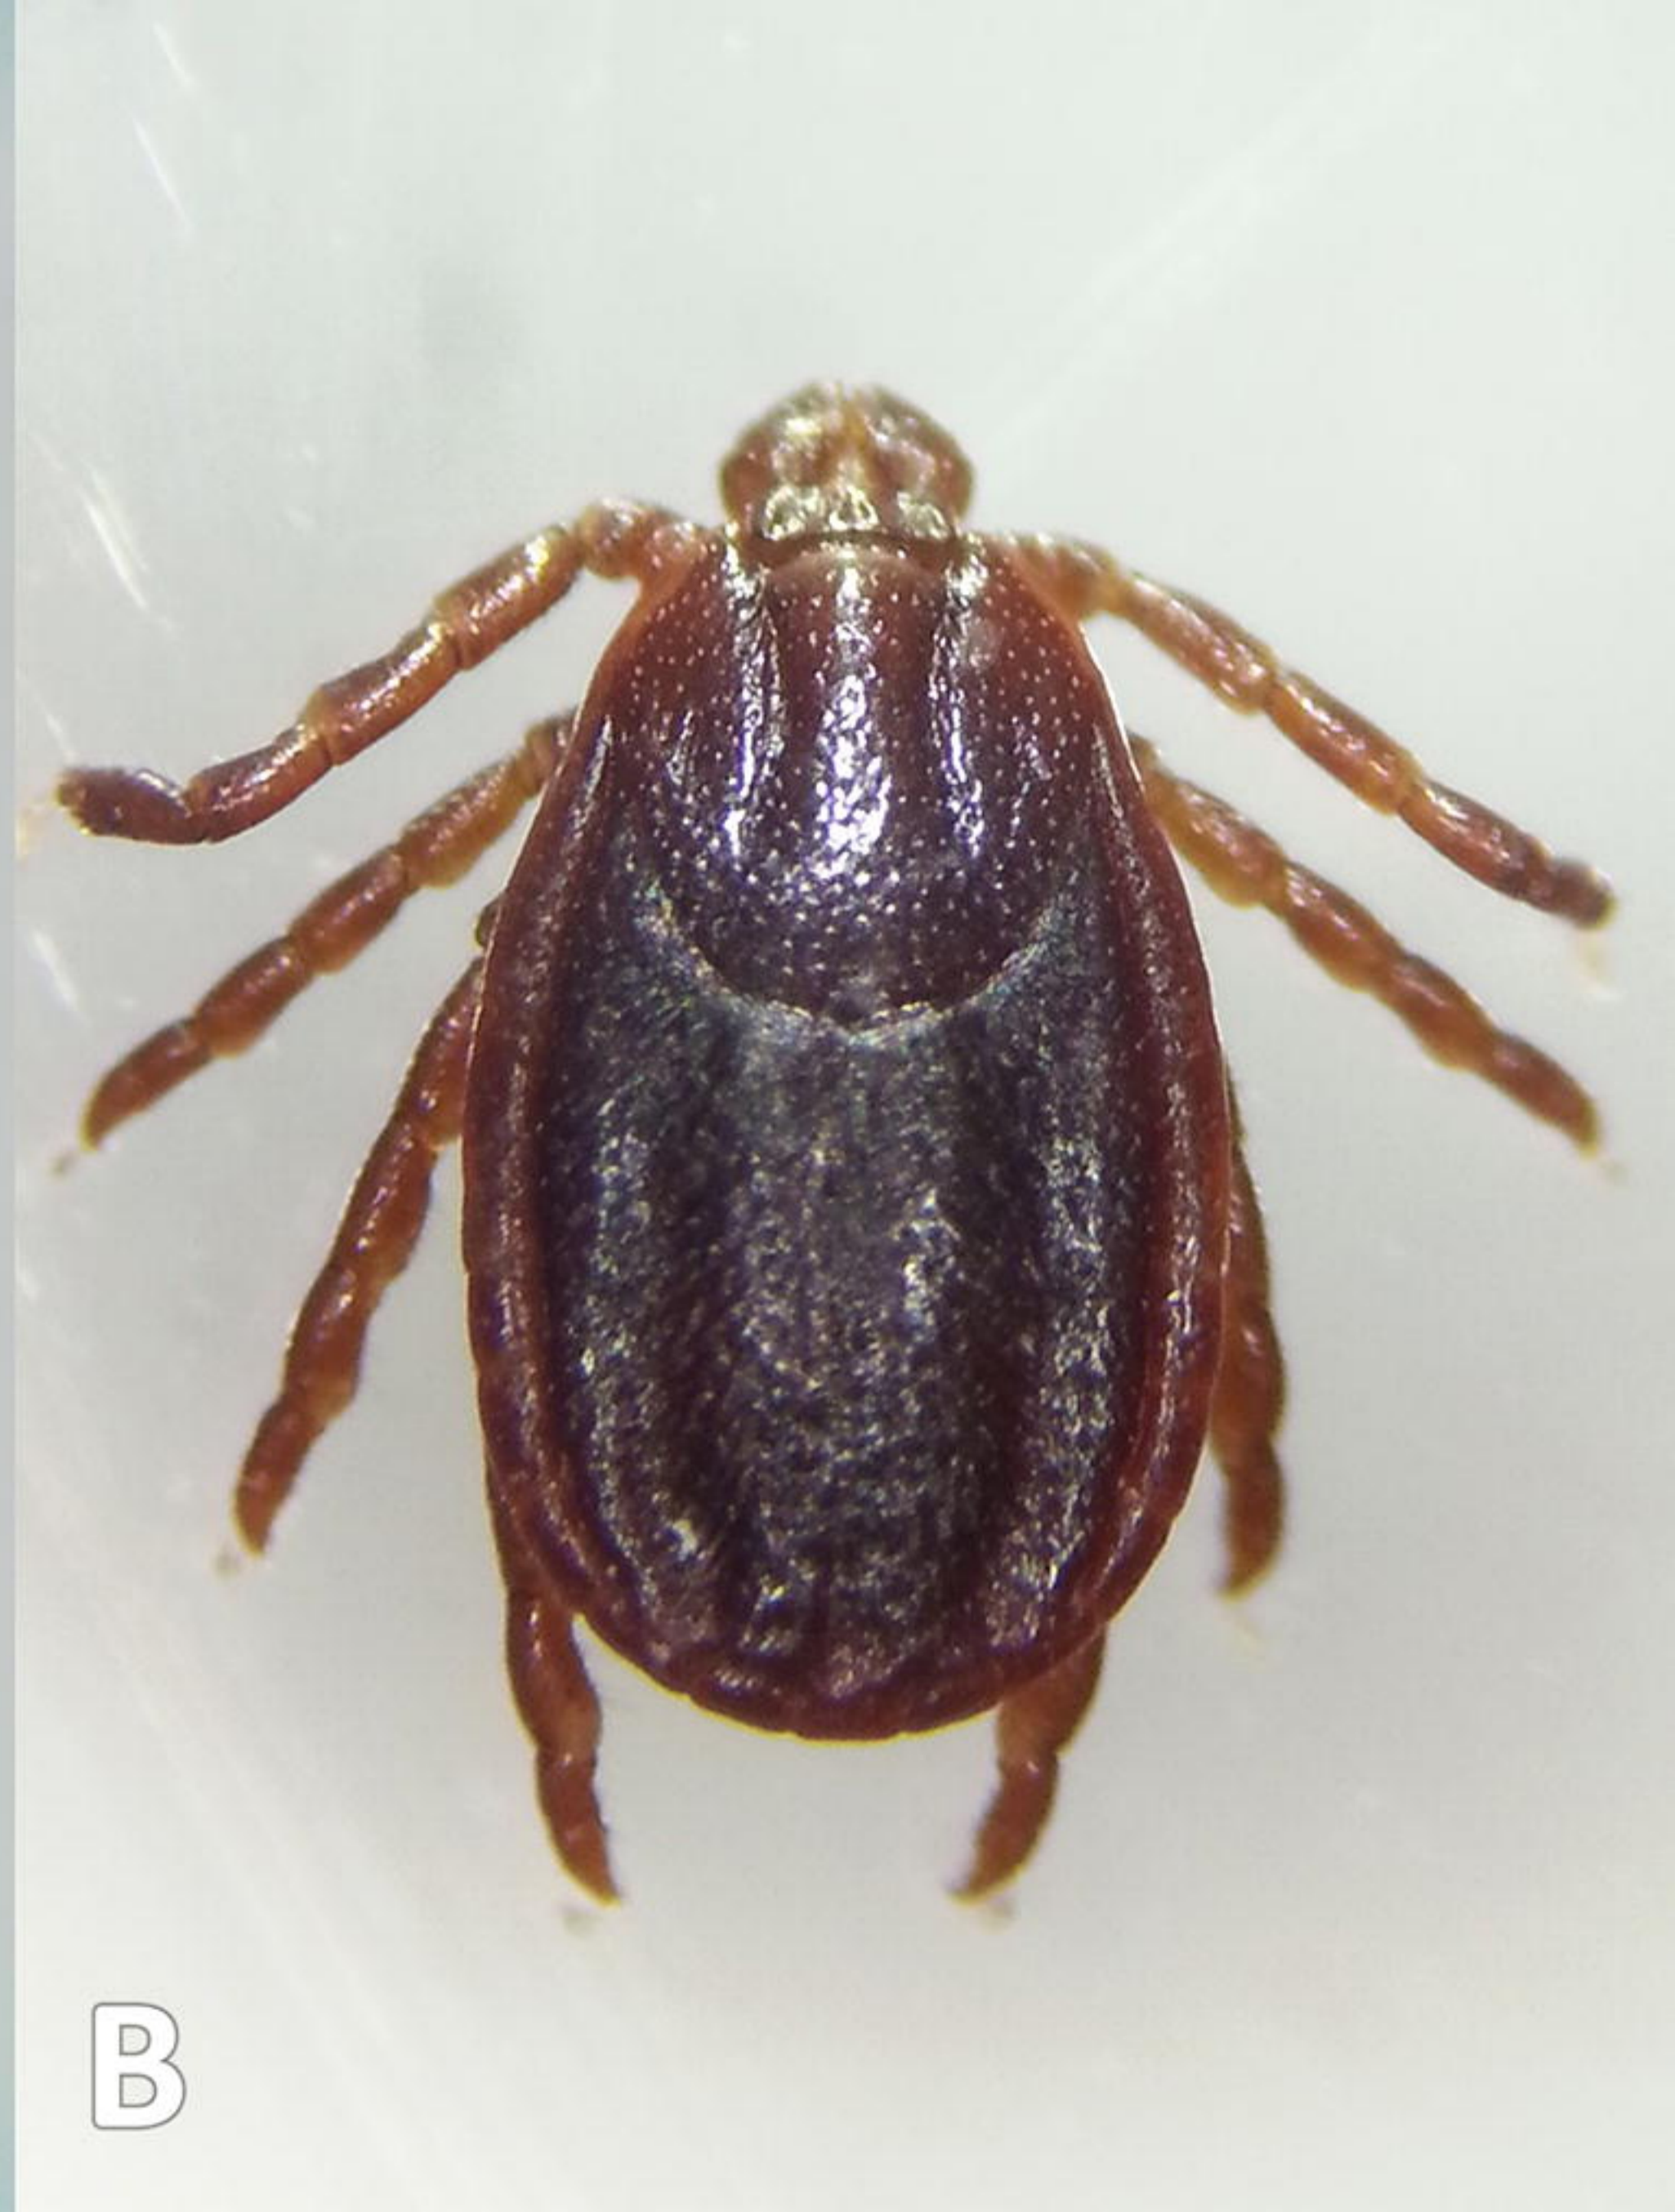

B

**A**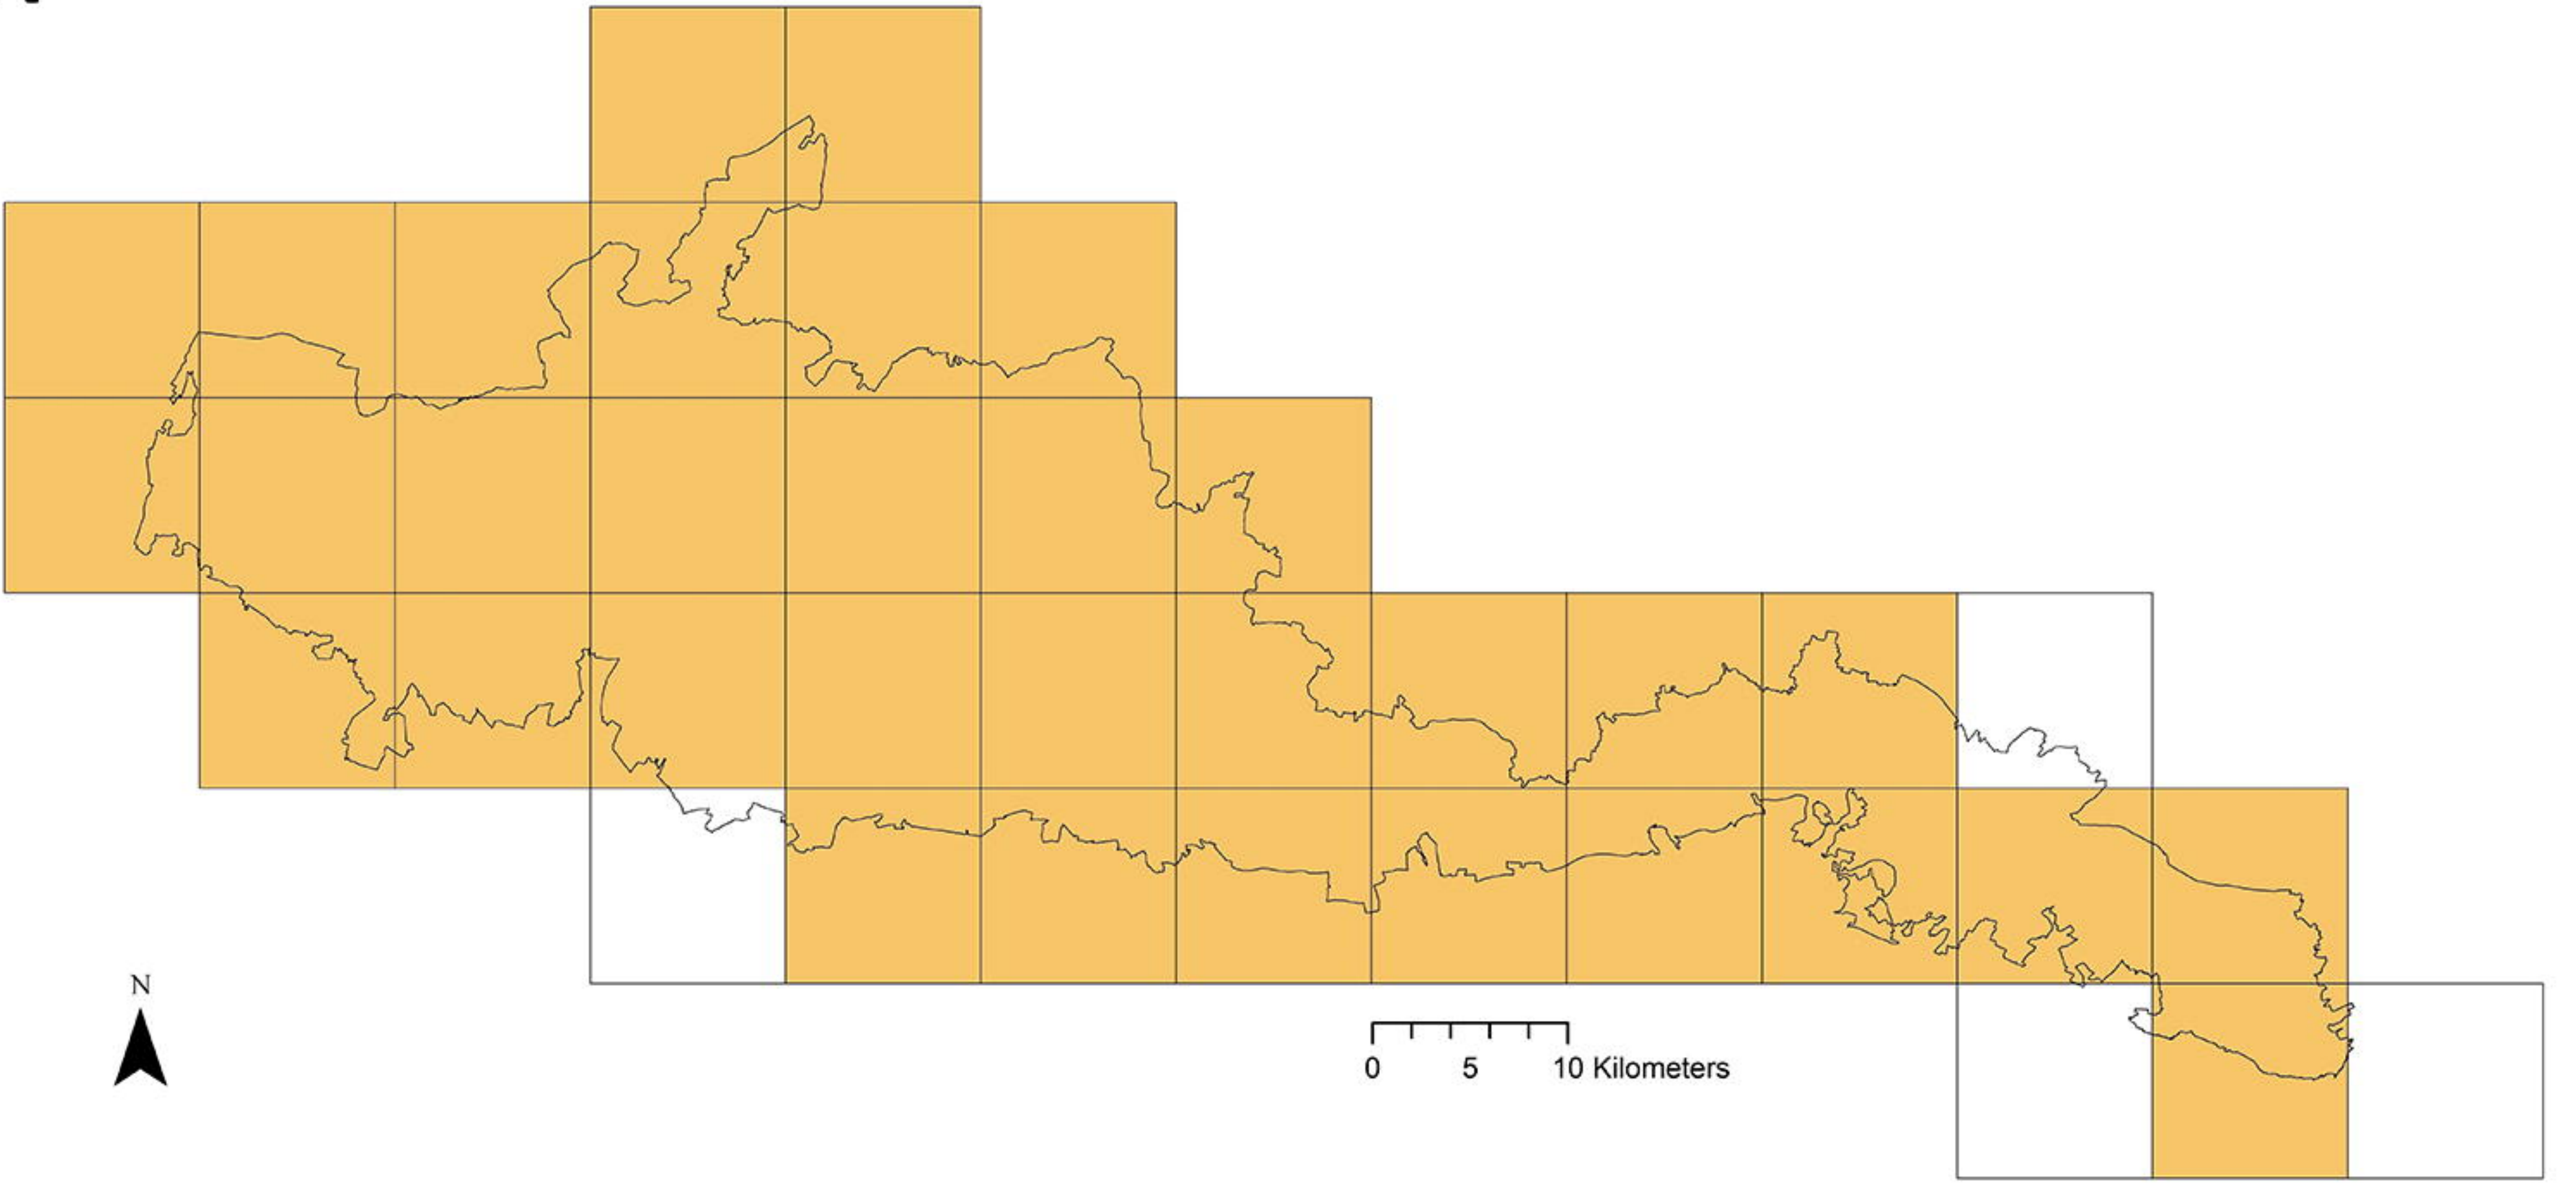**B**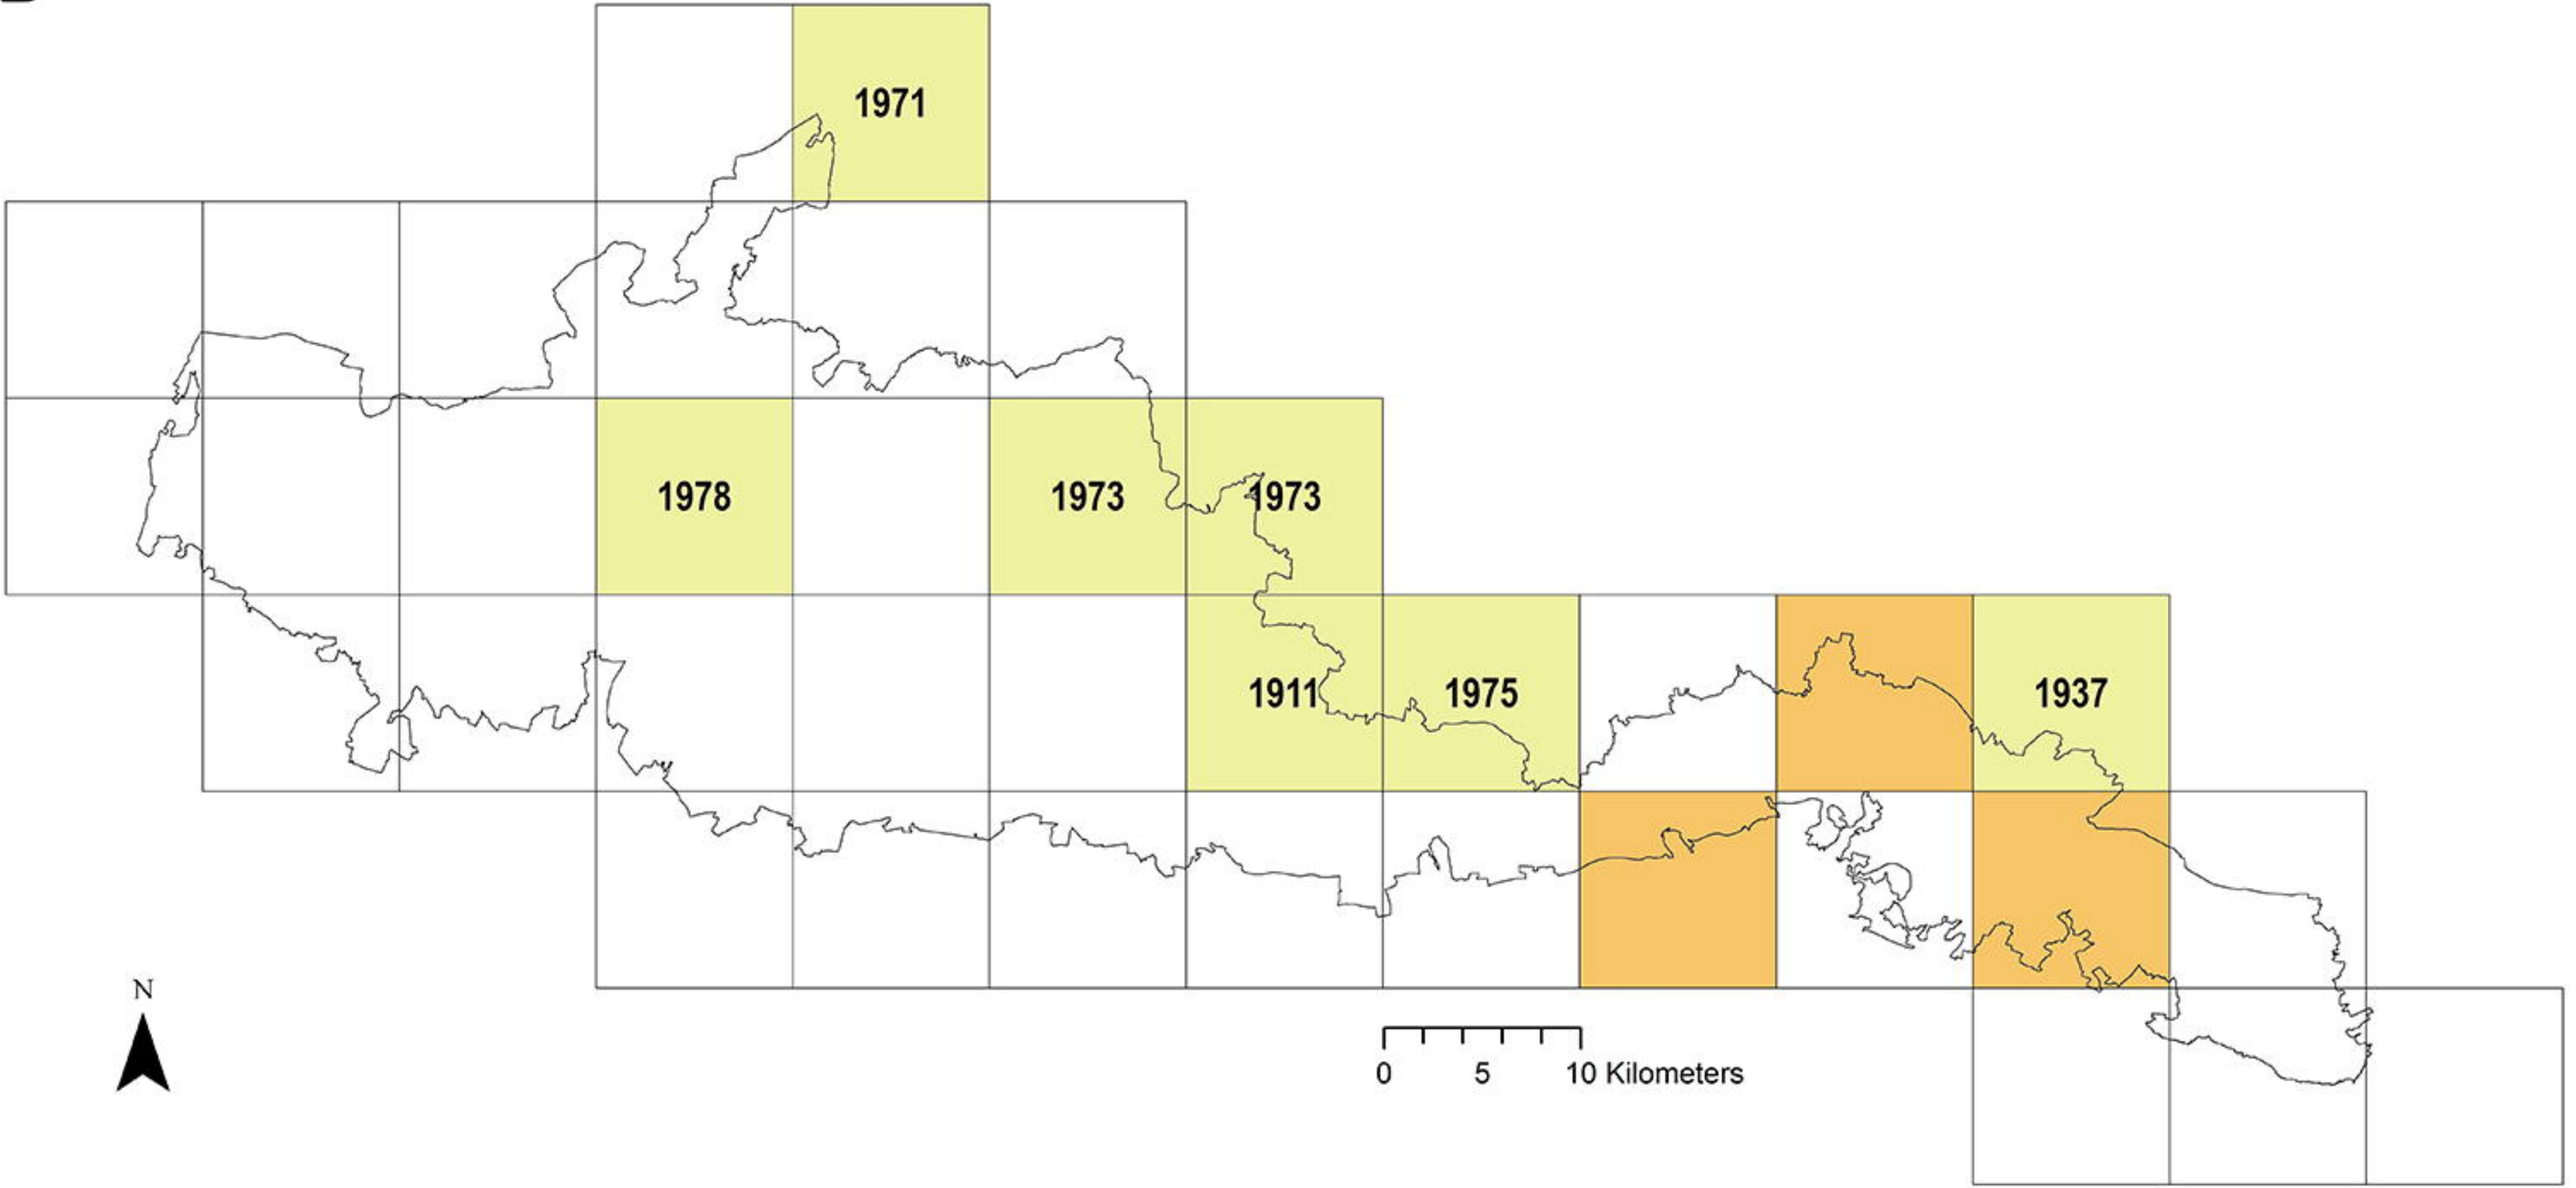**C**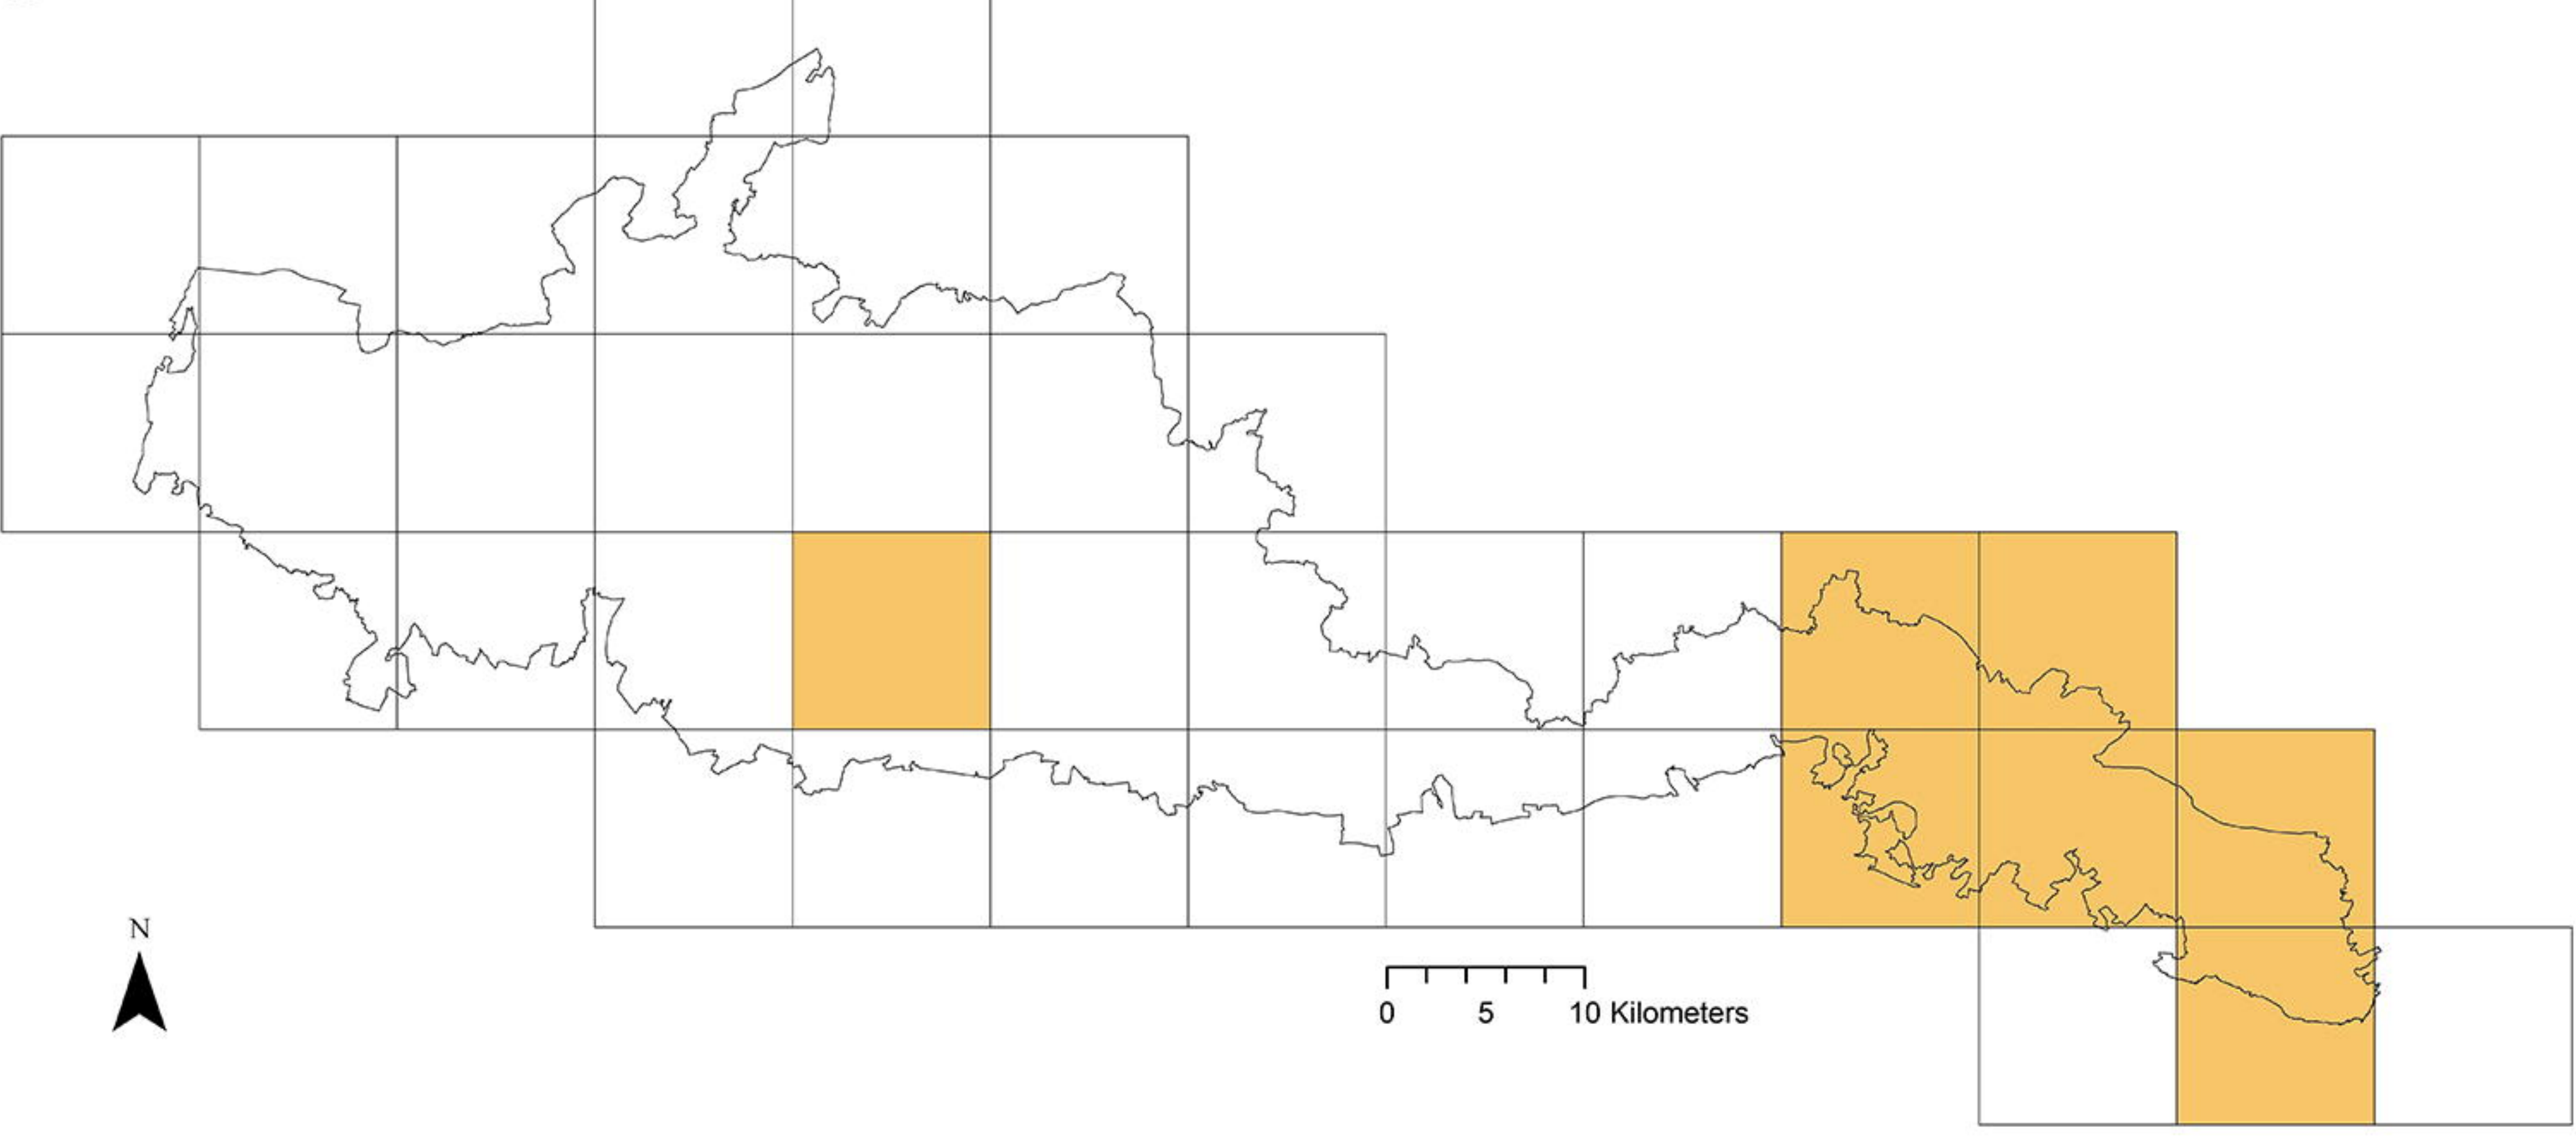

bioRxiv preprint doi: <https://doi.org/10.1101/2021.03.23.436533>; this version posted March 24, 2021. The copyright holder for this preprint (which was not certified by peer review) is the author/funder. All rights reserved. No reuse allowed without permission.

**D**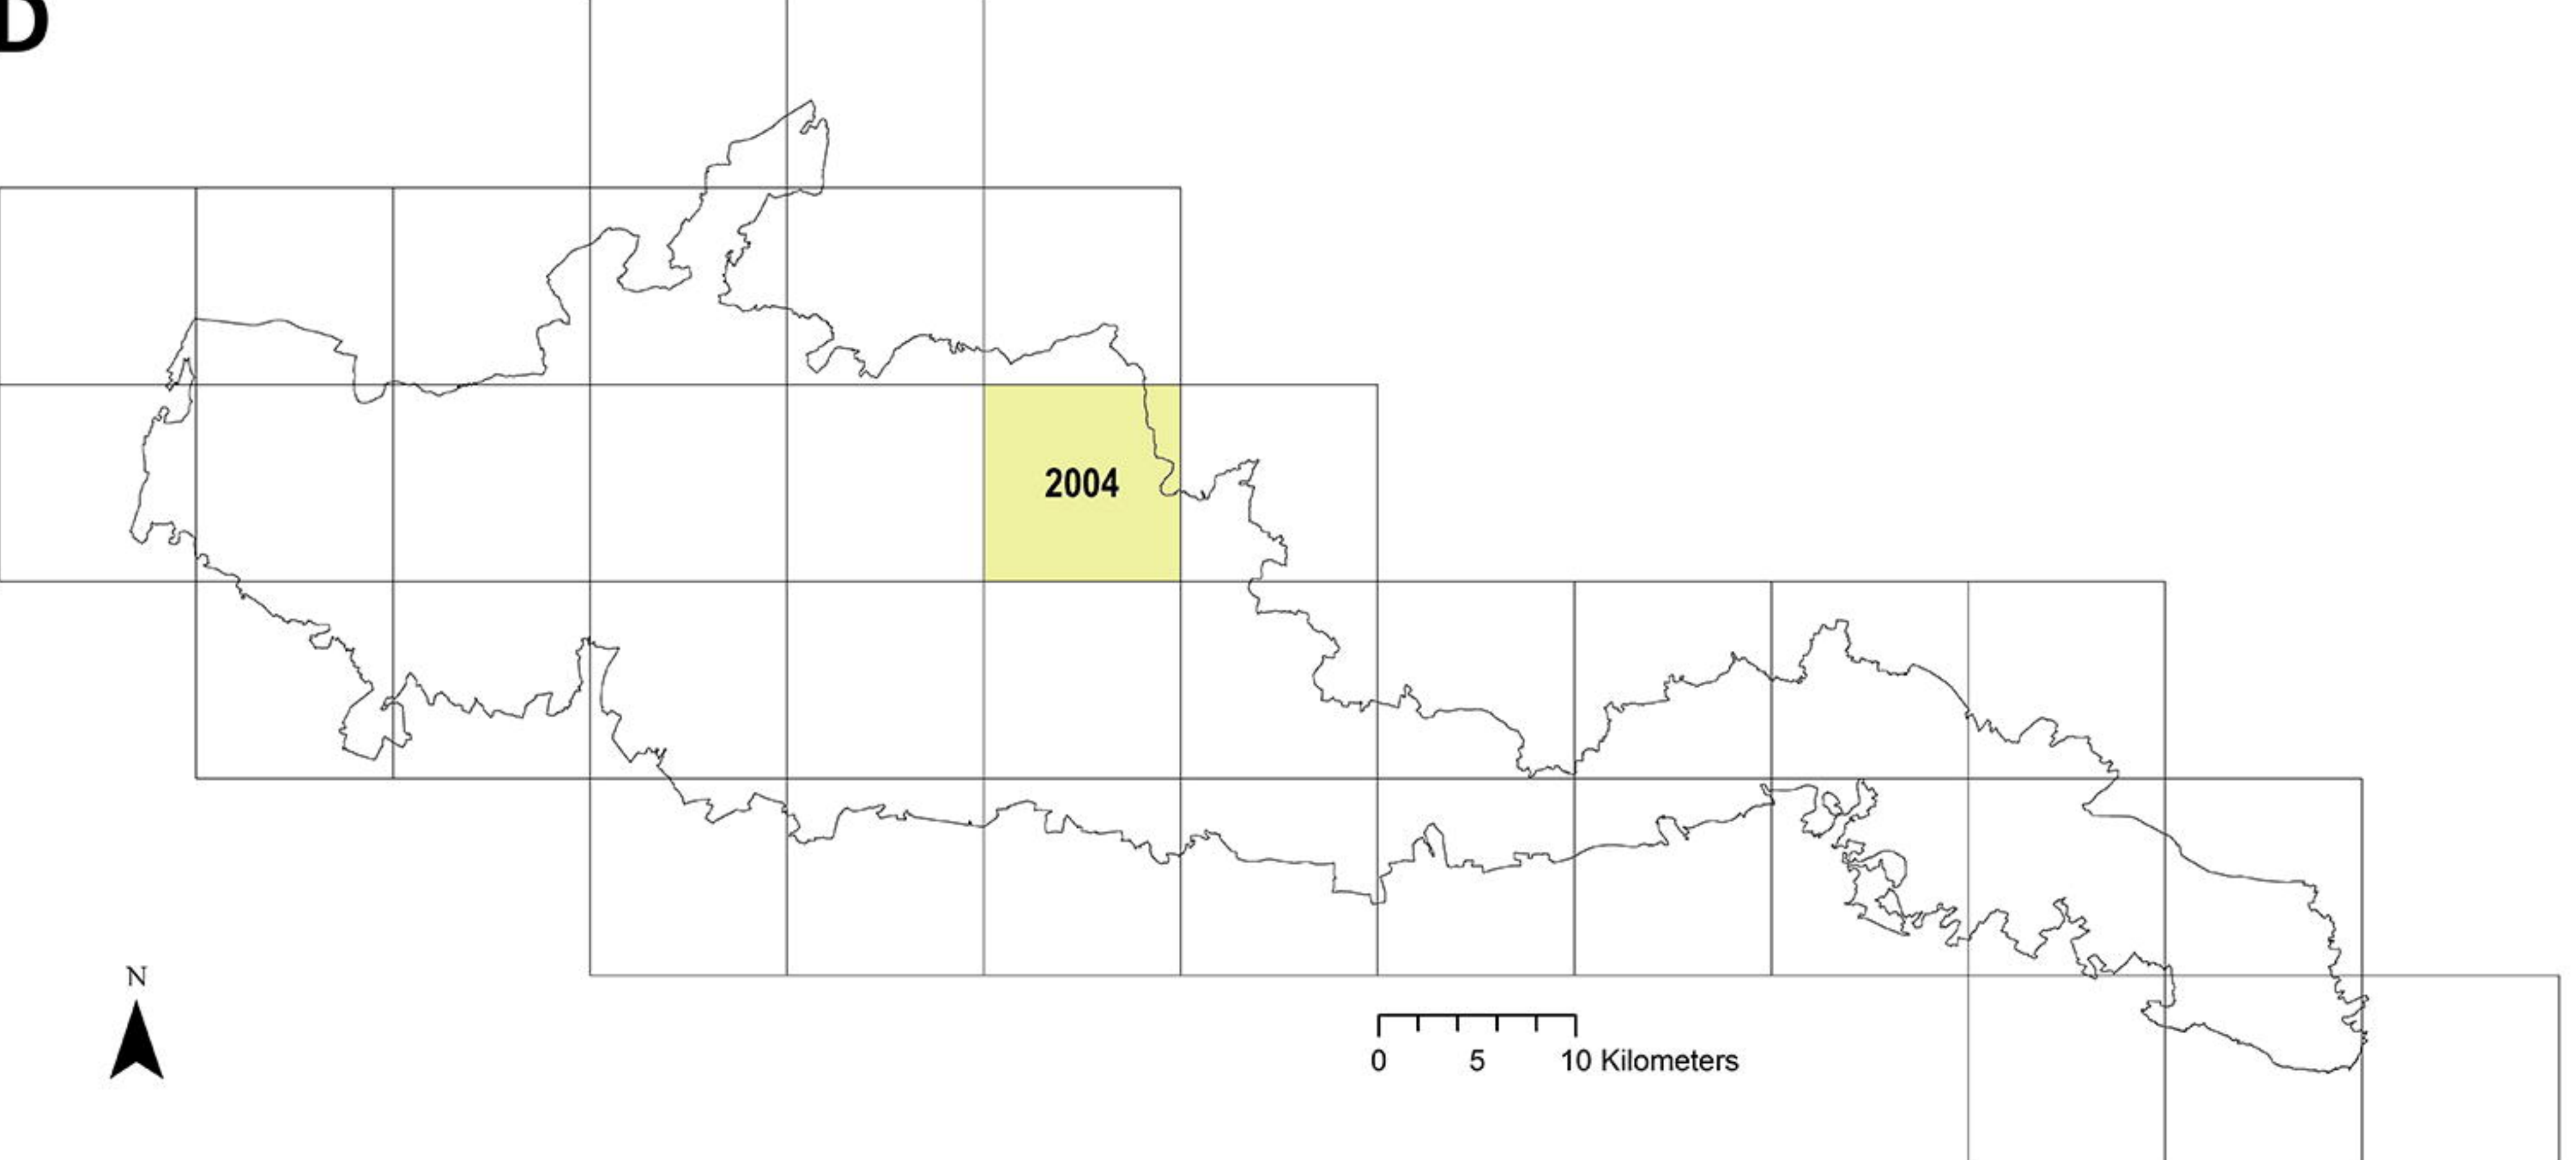

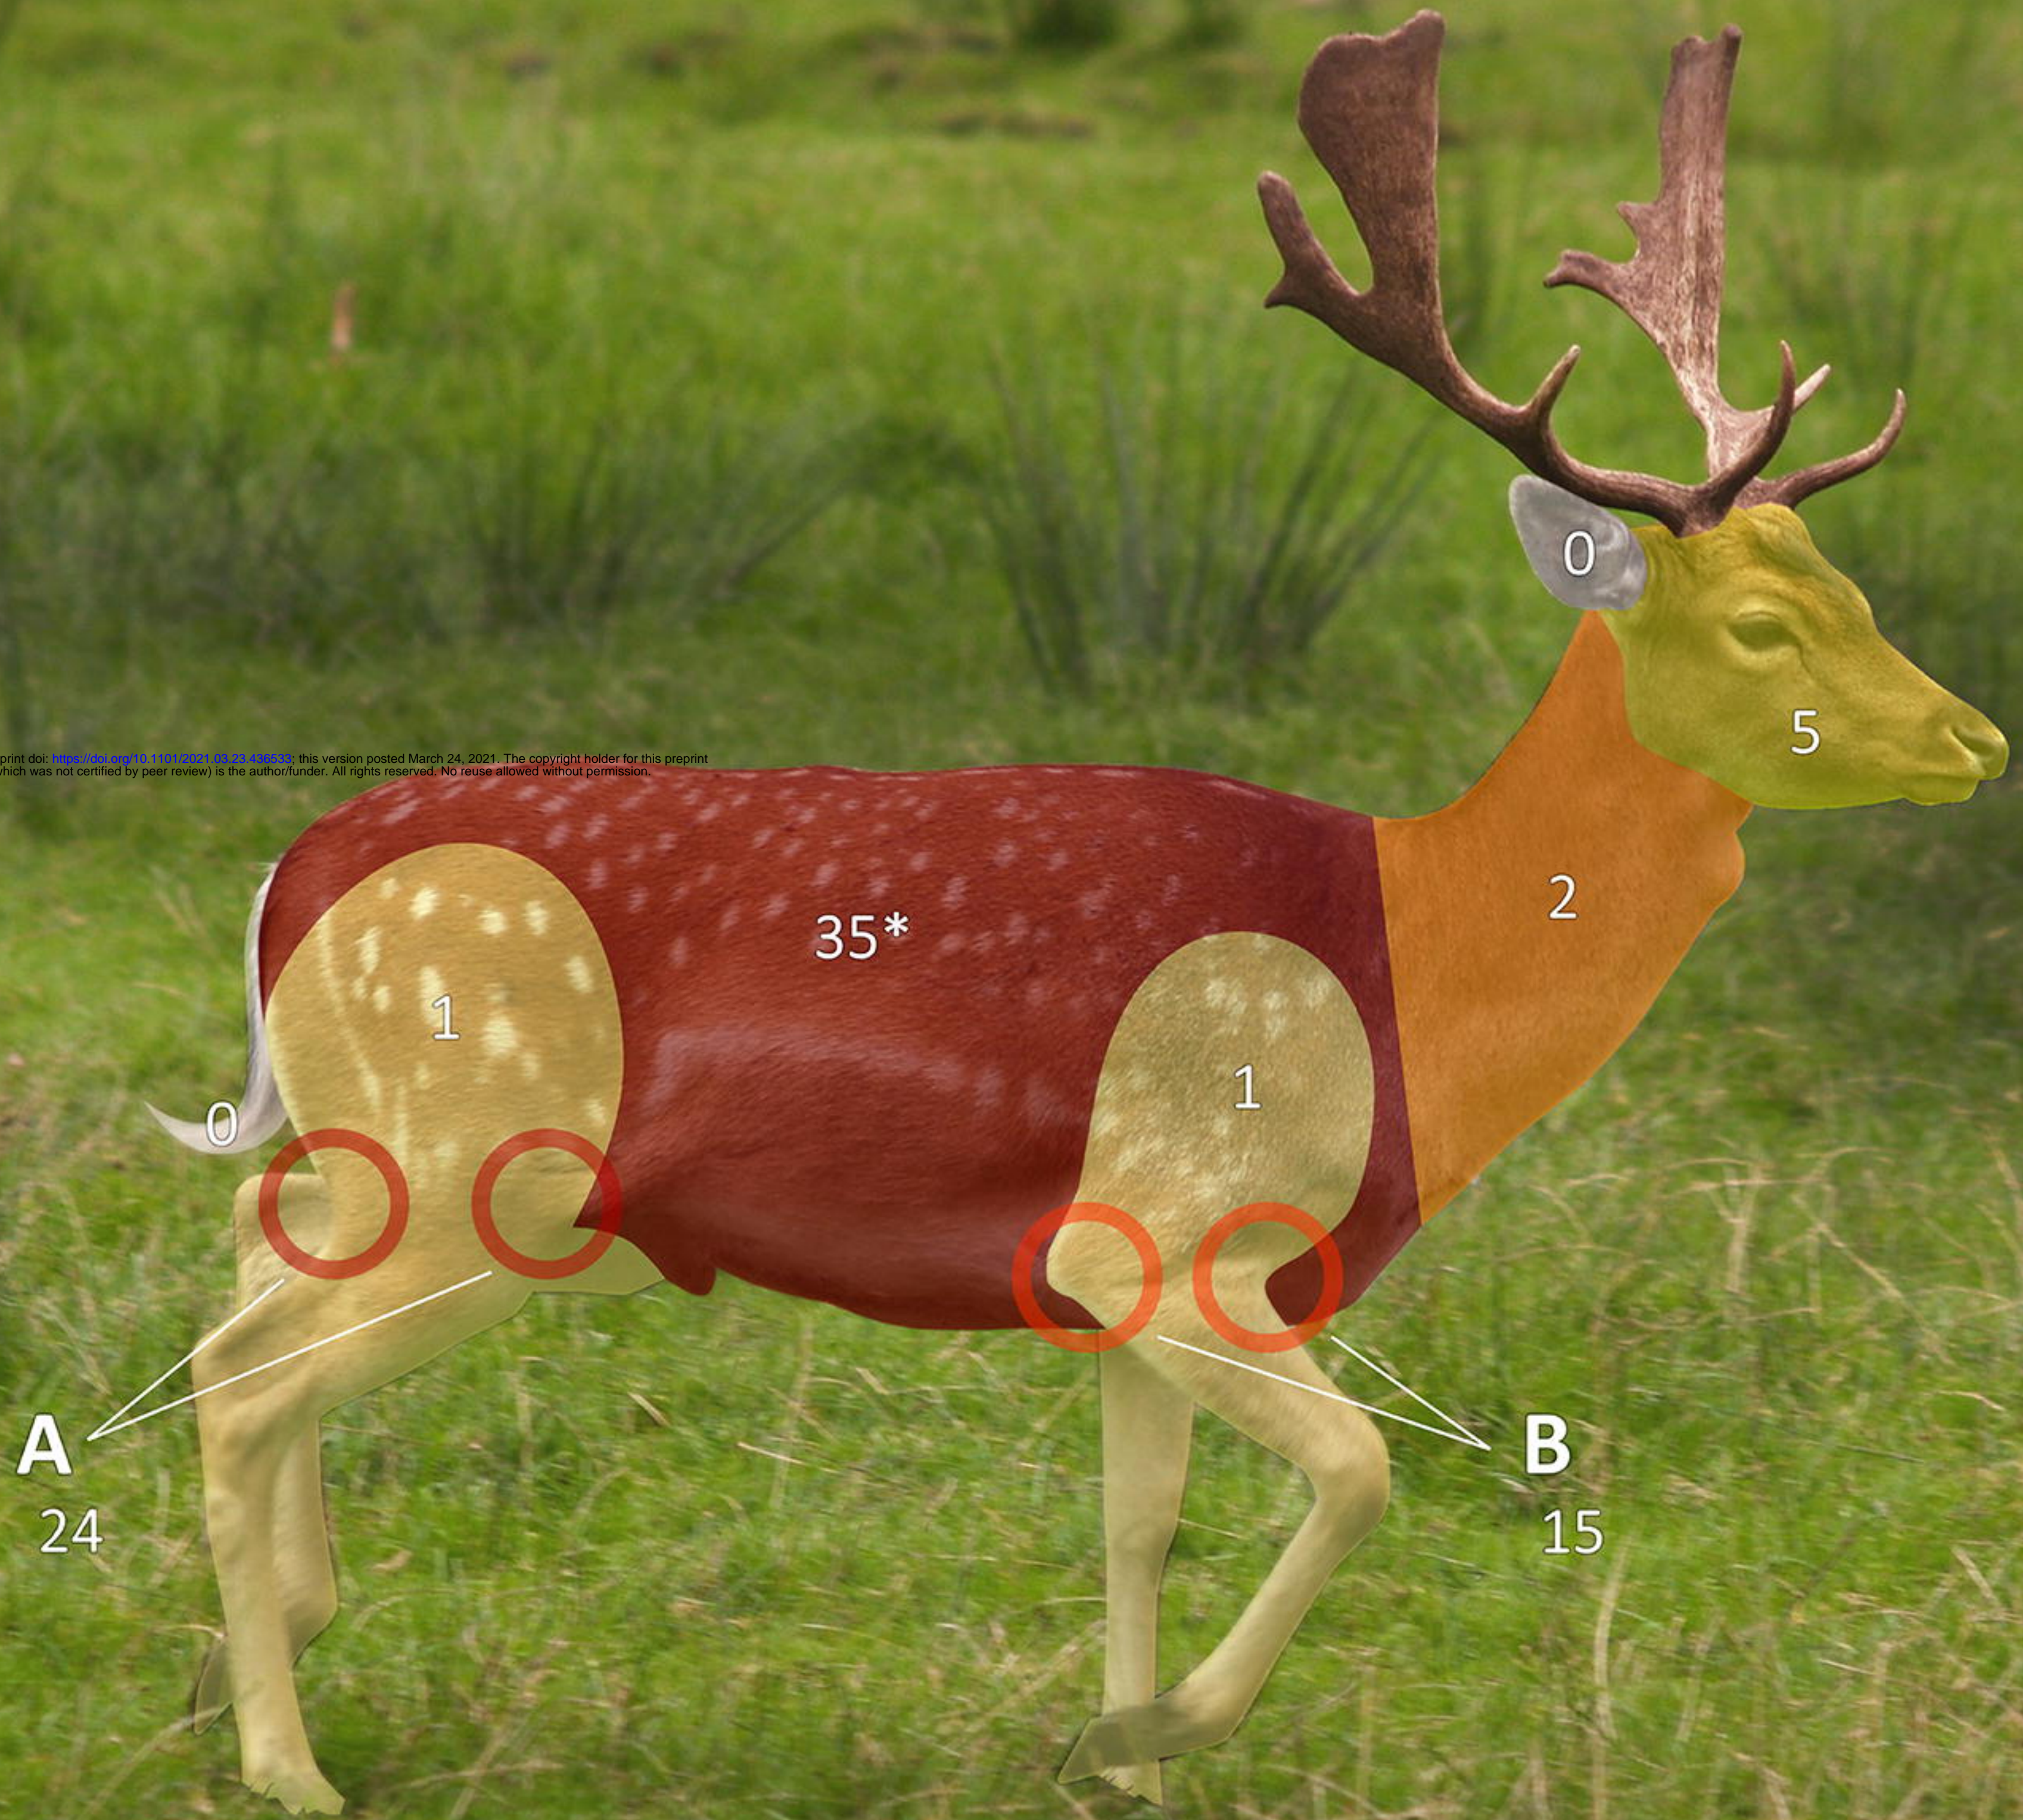

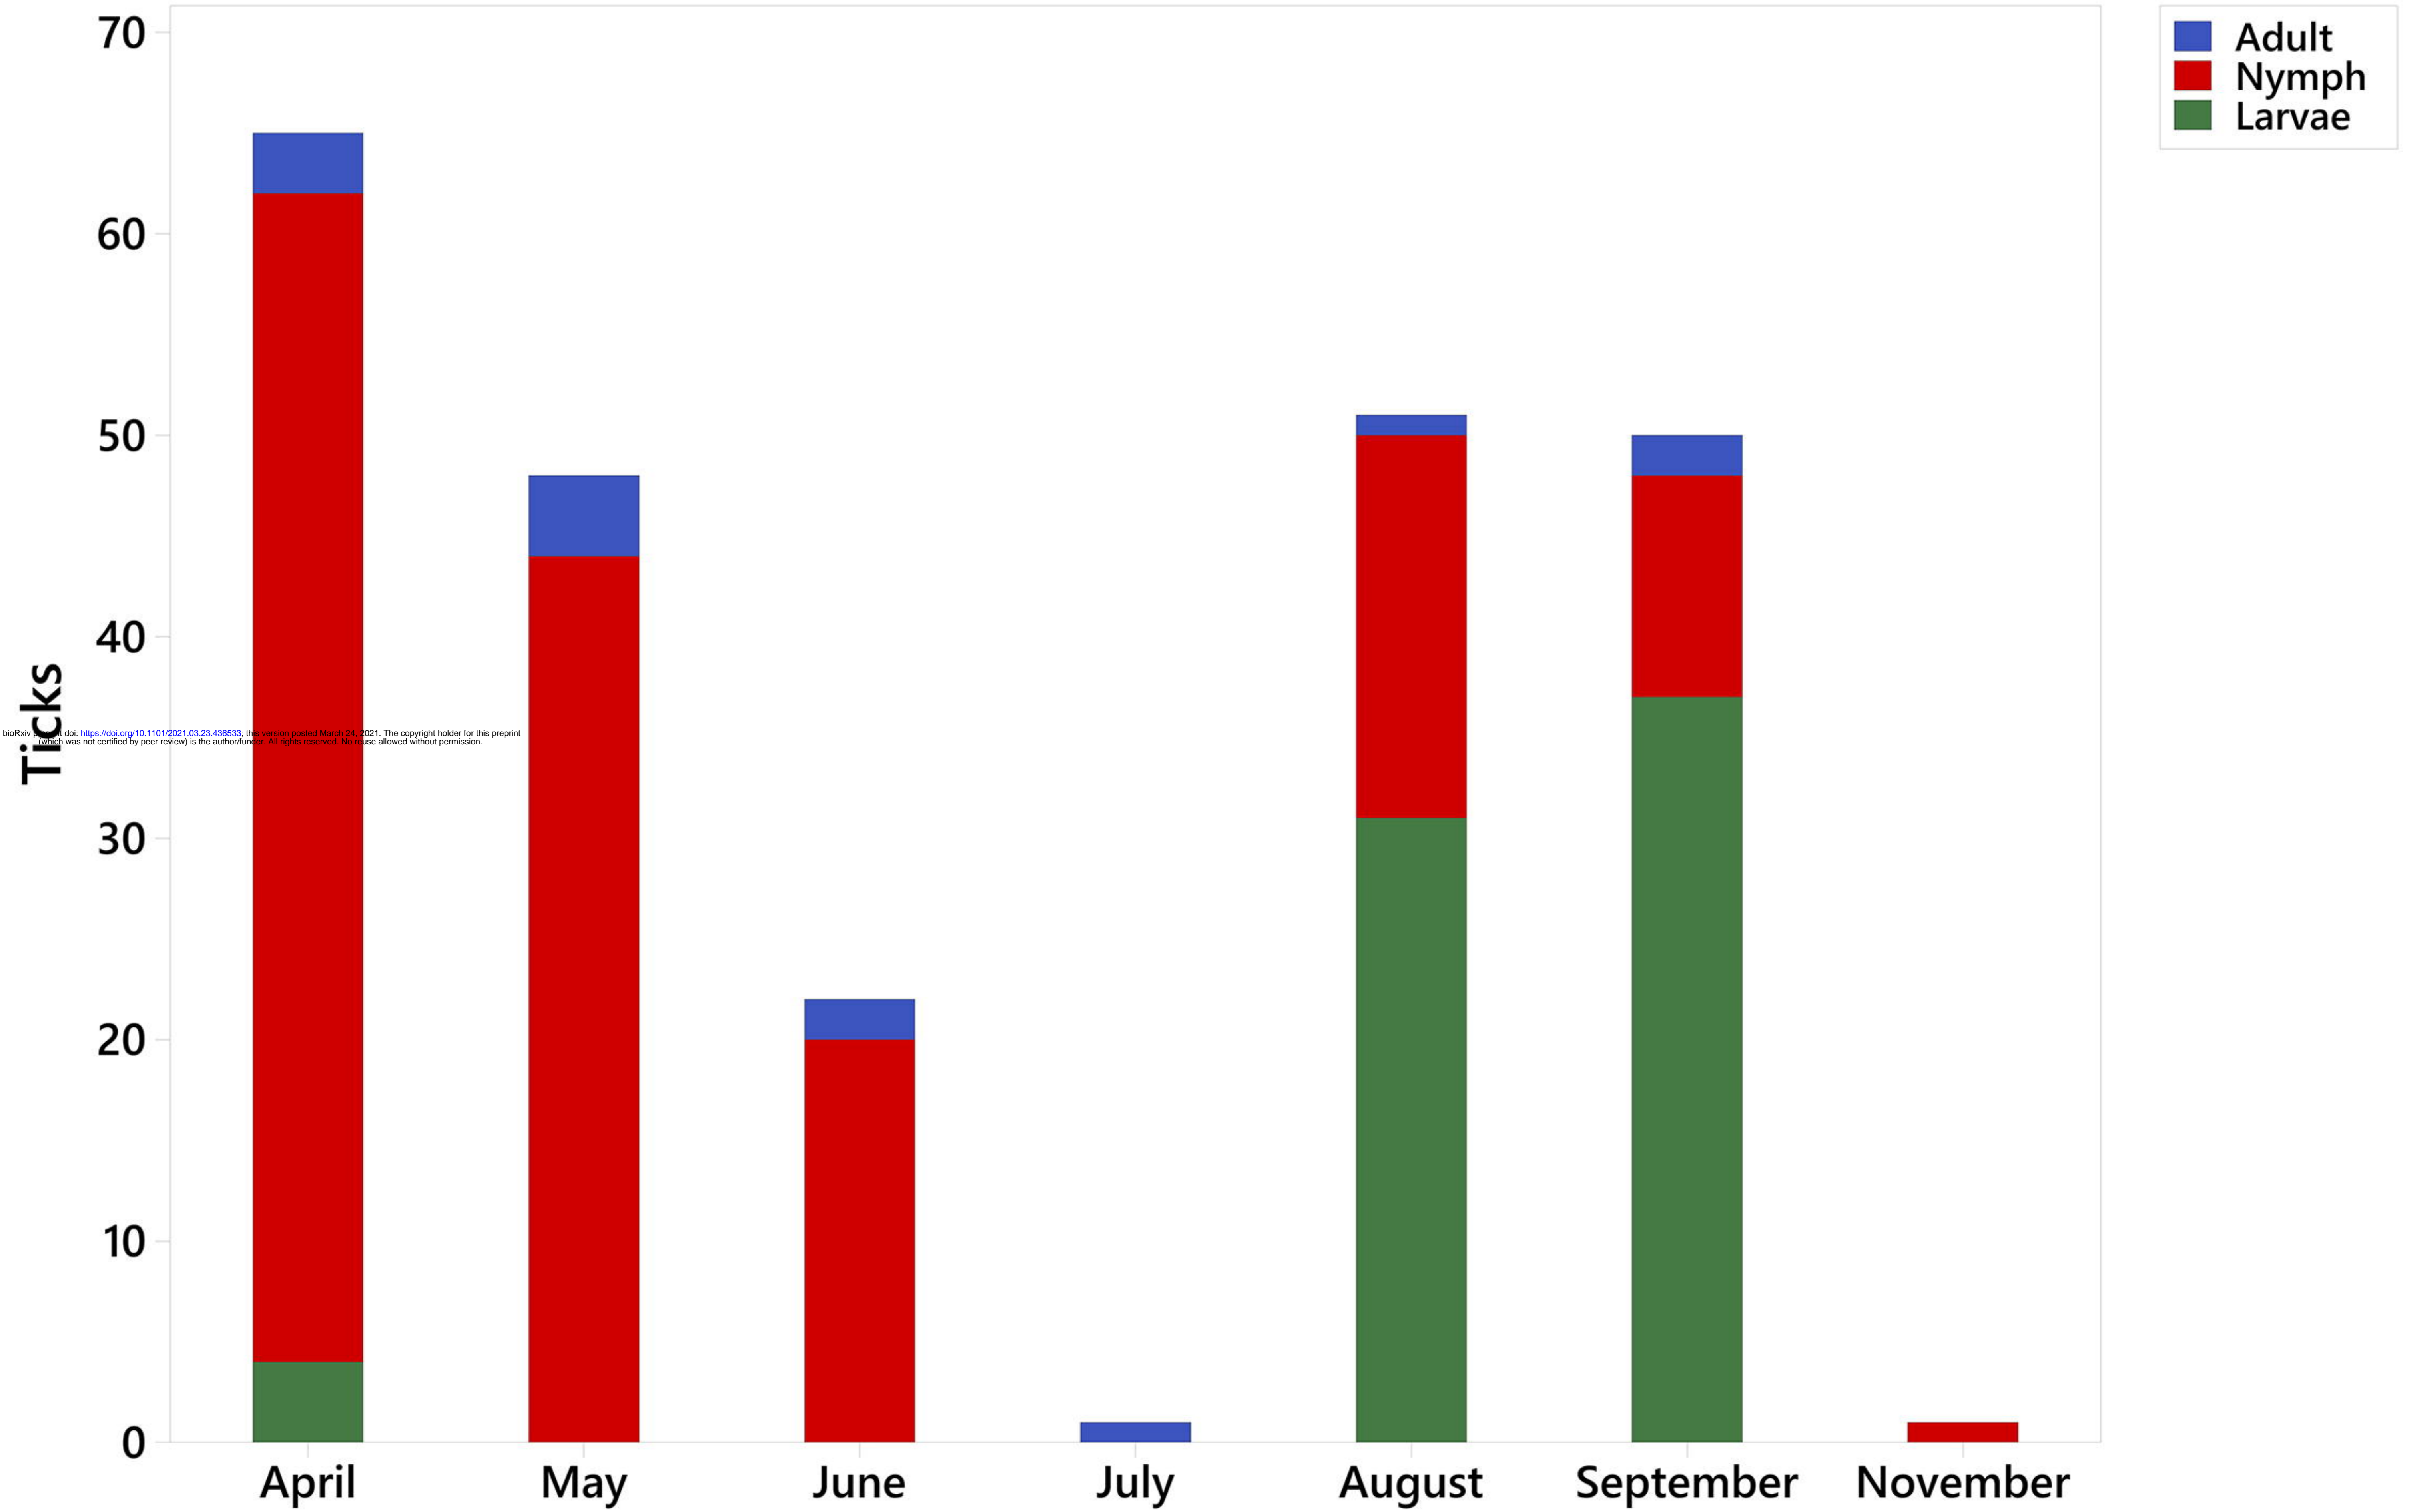

bioRxiv preprint doi: <https://doi.org/10.1101/2021.03.23.436533>; this version posted March 24, 2021. The copyright holder for this preprint (which was not certified by peer review) is the author/funder. All rights reserved. No reuse allowed without permission.
